# Supplementary material for: Synthesis of polysubstituted pyridazines via Cu-mediated C(sp3)–C(sp3) coupling/annulation of saturated ketones with acylhydrazones
Source: Royal Society of Chemistry journal article supplement (doi:10.1039/d4cc02760d), 2024-01-01
Supplement: d4cc02760d1.pdf [file d4cc02760d1.pdf]

# Supporting Information

## Synthesis of polysubstituted pyridazines via Cu-mediated C(sp<sup>3</sup>)-C(sp<sup>3</sup>) coupling/annulation of saturated ketones with acylhydrazones

Honggui Zhou,<sup>1,a</sup> Zhefeng Li,<sup>1,a</sup> Juehong Chen,<sup>a</sup> Si Zhou,<sup>a</sup> Xinyu Wang,<sup>a</sup> Linwei Zhang,<sup>a</sup> Jiuxi Chen<sup>a</sup>  
and Ningning Lv<sup>\*,a,b</sup>

<sup>a</sup>College of Chemistry & Materials Engineering, Wenzhou University, Wenzhou 325035, China.

<sup>b</sup>Key Lab of Biohealth Materials and Chemistry of Wenzhou, Wenzhou 325035, China.

*E-mail:* [ningninglv@wzu.edu.cn](mailto:ningninglv@wzu.edu.cn);

Supporting Information Placeholder

### Table of Contents

|                                                                            |            |
|----------------------------------------------------------------------------|------------|
| <b>1. General Information.....</b>                                         | <b>S2</b>  |
| <b>2. Experimental Section for the Synthesis of Substrates.....</b>        | <b>S2</b>  |
| <b>3. Optimization of Reaction Conditions.....</b>                         | <b>S5</b>  |
| <b>4. General Procedure for Accessing Polysubstituted Pyridazines.....</b> | <b>S8</b>  |
| <b>5. Analytical Data for All Products.....</b>                            | <b>S9</b>  |
| <b>6. Synthetic Applications.....</b>                                      | <b>S22</b> |
| <b>7. Mechanistic Investigations.....</b>                                  | <b>S24</b> |
| <b>8. References.....</b>                                                  | <b>S39</b> |
| <b>9. X-Ray Crystallographic Data for Product 3n.....</b>                  | <b>S40</b> |
| <b>10. NMR Spectra for All Products.....</b>                               | <b>S42</b> |

## 1. General Information.

Unless otherwise noted, all chemicals, containing 2-phenylacetophenones, ligands, propiophenones, *tert*-butylhydrazinecarboxylate, (1-phenylethylidene)benzohydrazide, Cu-catalysts, acid additives, base additives, oxidants, and all solvents, were obtained from commercial source and used as received without any further purification. (*E*)-*N'*-(1-phenylethylidene)Benzohydrazide substrates (**1**) were synthesized according to the relevant reference,<sup>1</sup> 2-phenylacetophenone substrates (**2**) were synthesized according to the relevant reference,<sup>2</sup> *tert*-butyl(*E*)-2-(Phenylethylidene)hydrazine-1-carboxylate substrates (**4**) were synthesized according to the relevant references.<sup>3-6</sup> 1-Phenylprop-2-en-1-one (**5h**) and (1-phenylethylidene)hydrazine (**1i**) were synthesized according to the relevant references.<sup>7-8</sup> <sup>1</sup>H NMR and <sup>13</sup>C NMR spectra were measured on a 500 MHz and 400 MHz Bruker spectrometer, using CDCl<sub>3</sub> as the solvent with tetramethylsilane (TMS) as the internal standard at room temperature. Chemical shifts are given  $\delta$  relative to tetramethylsilane, and the coupling constants *J* are given in hertz. The multiplicities are reported as follows: singlet (s), doublet (d), triplet (t), quarter (q) and multiplet (m). High-resolution mass spectra (HRMS) were recorded on an electrospray ionization (ESI-TOF) quadrupole time-of-flight mass spectrometer. Melting points were measured with WRR digital point apparatus. Analytical thin-layer chromatography (TLC) was performed on pre-coated, glass-backed silica gel plates. Flash column chromatography was performed over silica gel (300-400 mesh) using ethyl acetate (EA)/petroleum ether (PE) as eluent. X-ray crystallographic analysis was done at the X-ray crystallography facility, Shanghai Institute of Organic Chemistry (SIOC), Chinese Academy of Sciences (CAS).

## 2. Experimental Section for the Synthesis of Substrates.

### 2.1. General procedure for the synthesis of acylhydrazones (**1a-1h**)<sup>1</sup>

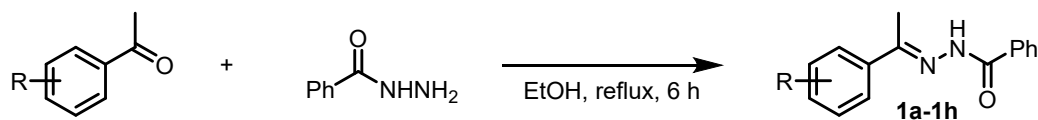

Standard procedure for the preparation of substituted acylhydrazones (**1a-1h**) were according to the reported procedure:<sup>1</sup> to a stirred solution of benzoyl hydrazine (10

mmol) in EtOH was added aryl ketones (10 mmol). The reaction mixture was heated under reflux for 6 hours, the precipitates were collected on a Büchner funnel. The acylhydrazones (**1a-1h**) were obtained in a quantitative yield and were purified by recrystallization from ethanol and washed with diethyl ether. In all cases, the obtained acylhydrazone was *E* configuration.

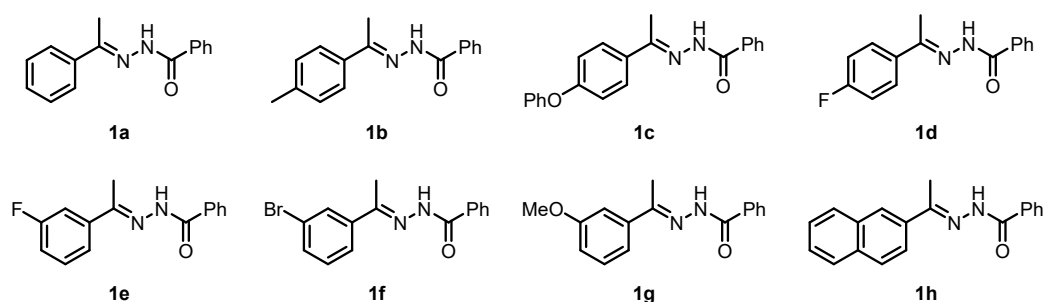

## 2.2. General procedure for the synthesis of 2-phenylacetophenones (**2a-2h**)<sup>2</sup>

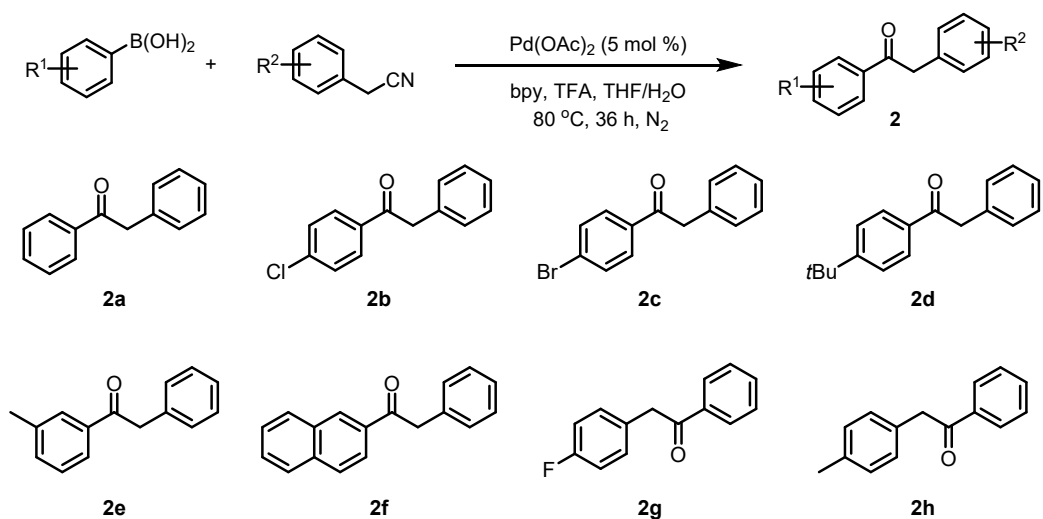

Standard procedure for the preparation of substituted 2-phenylacetophenones (**2a-2h**) were according to the reported procedure:<sup>2</sup> to a Schlenk tube with a magnetic stirring bar were charged the substituted 2-phenylacetonitriles (2 mmol), substituted arylboronic acids (4.0 mmol), Pd(OAc)<sub>2</sub> (5 mol %), 2,2'-bipyridine (10 mol %), TFA (10 equiv), THF (10 mL), and H<sub>2</sub>O (4 mL) under a N<sub>2</sub> atmosphere. The reaction mixture was stirred at 80 °C for 36 h. After cooling to room temperature, the mixture was poured into EtOAc (25 mL), which was washed with saturated NaHCO<sub>3</sub> solution (2 × 10 mL) and then brine (1 × 10 mL). After extracting the aqueous layer with EtOAc (3 × 10 mL), the combined organic layers were dried (Na<sub>2</sub>SO<sub>4</sub>), and evaporated under vacuum. The residue was purified by flash column chromatography (PE/EtOAc) to afford the

substituted 2-phenylacetophenones (**2a-2h**).

### 2.3. General procedure for the synthesis of acylhydrazones (**4a-4k**)<sup>3-6</sup>

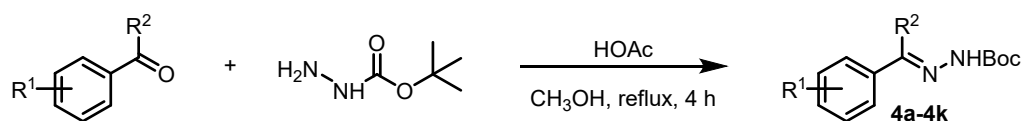

Standard procedure for the preparation of substituted acylhydrazones (**4a-4k**) were according to the reported procedures:<sup>3-6</sup> to a stirred solution of tertiary butyl carbazate (10 mmol, 1.32 g) and HOAc (2 mmol, 0.12 g) in CH<sub>3</sub>OH (5 mL) was added corresponding substituted acetophenones (10 mmol) and allowed to stir the reaction mixture at reflux for about 4 h. The completion of the reaction was monitored by TLC chromatography. After completion of the reaction, the reaction mixture was cooled and filtered to remove the solvent. The filtered solid was recrystallized with petroleum ether to get the pure corresponding acylhydrazones (**4a-4k**). In all cases, the obtained acylhydrazone was *E* configuration.

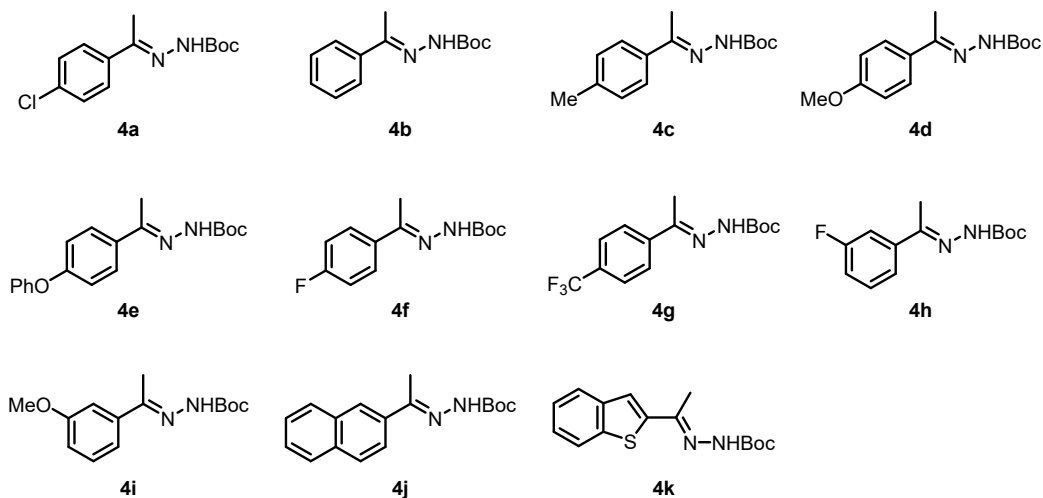

### 2.4. General procedure for the synthesis of 1-phenylprop-2-en-1-one (**5h**)<sup>7</sup>

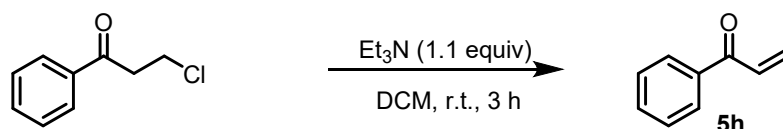

Standard procedure for the preparation of 1-phenylprop-2-en-1-one (**5h**) was according to the reported procedure:<sup>7</sup> to a 50 mL round bottom flask equipped with magnetic stir bar was added 3-chloro-1-phenylpropan-1-one (10 mmol) in DCM (20 mL), then Et<sub>3</sub>N (11 mmol) was added dropwise for about 10 min, afterwards, the reaction was stirred

at room temperature for the appropriate time (monitored by TLC). After completion of the reaction, the mixture was poured into DCM (15 mL) and washed with water (3 x 20 mL), then dried with anhydrous Na<sub>2</sub>SO<sub>4</sub> and evaporated under vacuum. The residue was purified by flash column chromatography (hexane-EtOAc) to afford the targeted 1-phenylprop-2-en-1-one (**5h**).

### 2.5. General procedure for the synthesis of (1-phenylethylidene)hydrazine (**1i**)<sup>8</sup>

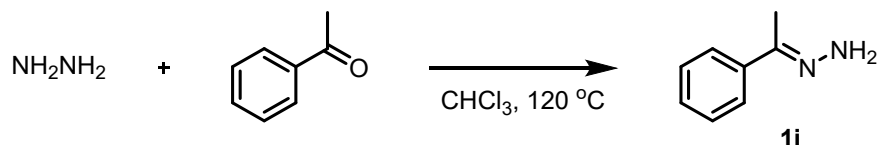

Standard procedure for the preparation of (1-phenylethylidene)hydrazine (**1i**) was according to the reported procedure:<sup>8</sup> to a 100 mL round bottom flask equipped with magnetic stir bar was added hydrazine hydrate (1.2 mol) and acetophenone (40.0 mmol) in CHCl<sub>3</sub> (30 mL), then stirred the reaction mixture at 120 °C for 4 hours. After cooling to room temperature, the mixture was extracted with DCM. The combined organic layer was washed with brine, then dried with Na<sub>2</sub>SO<sub>4</sub> and evaporated under vacuum to afford the targeted product **1i**. The obtained hydrazine was *E* configuration.

### 3. Optimization of Reaction Conditions.

**Table S1. Optimization of reaction conditions for the synthesis of 3,4,6-trisubstituted pyridazine.<sup>a,b</sup>**

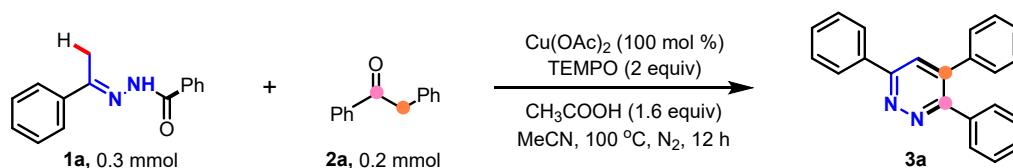

| entry    | Deviation from the standard conditions                | yield(%) <sup>b</sup> |
|----------|-------------------------------------------------------|-----------------------|
| <b>1</b> | <b>none</b>                                           | <b>90</b>             |
| 2        | without Cu-salt                                       | trace                 |
| 3        | without TEMPO                                         | 33                    |
| 4        | without acid additive                                 | 55                    |
| 5        | CuBr <sub>2</sub> instead of Cu(OAc) <sub>2</sub>     | 15                    |
| 6        | Cu(OTf) <sub>2</sub> instead of Cu(OAc) <sub>2</sub>  | 17                    |
| 7        | Cu(acac) <sub>2</sub> instead of Cu(OAc) <sub>2</sub> | 48                    |
| 8        | CuI instead of Cu(OAc) <sub>2</sub>                   | 46                    |

|    |                                                                 |       |
|----|-----------------------------------------------------------------|-------|
| 9  | DMF instead of MeCN                                             | trace |
| 10 | THF instead of MeCN                                             | 15    |
| 11 | DMSO instead of MeCN                                            | 35    |
| 12 | EtOH instead of MeCN                                            | 45    |
| 13 | PhCH <sub>3</sub> instead of MeCN                               | 15    |
| 14 | <sup>n</sup> C <sub>4</sub> H <sub>9</sub> COOH instead of HOAc | 79    |
| 15 | PivOH instead of HOAc                                           | 75    |
| 16 | 0.5 equiv. Cu(OAc) <sub>2</sub> was used                        | 74    |
| 17 | 1.5 equiv. Cu(OAc) <sub>2</sub> was used                        | 75    |
| 18 | 120 °C instead of 100 °C                                        | 80    |
| 19 | 80 °C instead of 100 °C                                         | 48    |
| 20 | air instead of N <sub>2</sub>                                   | 58    |
| 21 | O <sub>2</sub> instead of N <sub>2</sub>                        | 19    |

<sup>a</sup>Reaction Conditions: **1a** (0.3 mmol), **2a** (0.2 mmol), Cu(OAc)<sub>2</sub> (100 mol%), TEMPO (2 equiv), HOAc (1.6 equiv), MeCN (2 mL), 100 °C, N<sub>2</sub>, 12 h. <sup>b</sup>Isolated yields.

**Table S2. Screening of the leaving group on the acylhydrazone for the synthesis of 3,4,6-trisubstituted pyridazine.**<sup>a,b</sup>

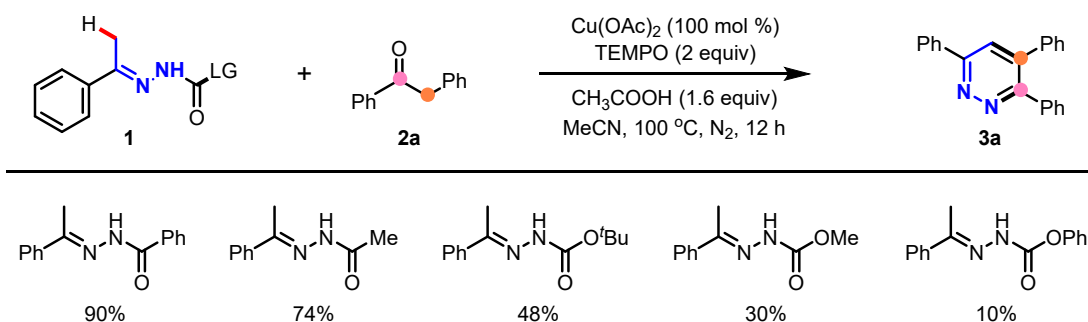

<sup>a</sup>Reaction Conditions: **1** (0.3 mmol), **2a** (0.2 mmol), Cu(OAc)<sub>2</sub> (100 mol%), TEMPO (2 equiv), HOAc (1.6 equiv), MeCN (2 mL), 100 °C, N<sub>2</sub>, 12 h. <sup>b</sup>Isolated yields.

**Table S3. Optimization of reaction conditions for the synthesis of 3,5-disubstituted pyridazine.**<sup>a,b</sup>

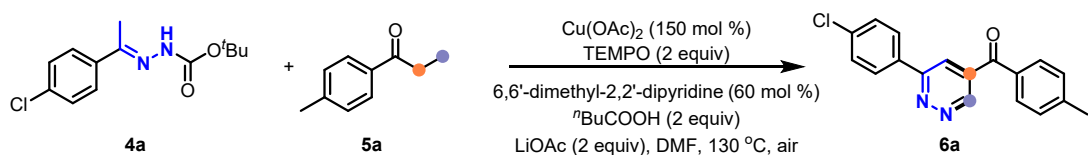

| entry    | deviation from the standard conditions | yield(%) <sup>b</sup> |
|----------|----------------------------------------|-----------------------|
| <b>1</b> | <b>none</b>                            | <b>76</b>             |
| 2        | without Cu-salt                        | trace                 |
| 3        | without TEMPO                          | trace                 |
| 4        | without ligand                         | 50                    |

|    |                                                                  |       |
|----|------------------------------------------------------------------|-------|
| 5  | without base additive                                            | 57    |
| 6  | without acid additive                                            | 56    |
| 7  | Cu(acac) <sub>2</sub> instead of Cu(OAc) <sub>2</sub>            | <10   |
| 8  | Cu(OTf) <sub>2</sub> instead of Cu(OAc) <sub>2</sub>             | <10   |
| 9  | CuSO <sub>4</sub> instead of Cu(OAc) <sub>2</sub>                | 24    |
| 10 | CuCl <sub>2</sub> instead of Cu(OAc) <sub>2</sub>                | trace |
| 11 | CuI instead of Cu(OAc) <sub>2</sub>                              | <10   |
| 12 | MeCN instead of DMF                                              | 15    |
| 13 | DCE instead of DMF                                               | <10   |
| 14 | THF instead of DMF                                               | 20    |
| 15 | DMSO instead of DMF                                              | 57    |
| 16 | NMP instead of DMF                                               | 60    |
| 17 | HOAc instead of <sup>n</sup> C <sub>4</sub> H <sub>9</sub> COOH  | 66    |
| 18 | PivOH instead of <sup>n</sup> C <sub>4</sub> H <sub>9</sub> COOH | 69    |
| 19 | Li <sub>2</sub> CO <sub>3</sub> instead of LiOAc                 | 50    |
| 20 | LiOH instead of LiOAc                                            | 58    |
| 21 | LiOMe instead of LiOAc                                           | 60    |
| 22 | L2 instead of L1                                                 | 55    |
| 23 | L3 instead of L1                                                 | 40    |
| 24 | L4 instead of L1                                                 | 65    |
| 25 | L5 instead of L1                                                 | 65    |
| 26 | N <sub>2</sub> instead of air                                    | 62    |
| 27 | O <sub>2</sub> instead of air                                    | 38    |
| 28 | 140 °C instead of 130 °C                                         | 74    |
| 29 | 120 °C instead of 130 °C                                         | 68    |

<sup>a</sup>Reaction Conditions: **4a** (0.25 mmol), **5a** (0.2 mmol), Cu(OAc)<sub>2</sub> (150 mol%), TEMPO (2 equiv), 6,6'-dimethyl-2,2'-bipyridine (60 mol%), <sup>n</sup>C<sub>4</sub>H<sub>9</sub>COOH (2 equiv), LiOAc (2 equiv), DMF (2 mL), 130 °C, air, 12 h. <sup>b</sup>Isolated yields.

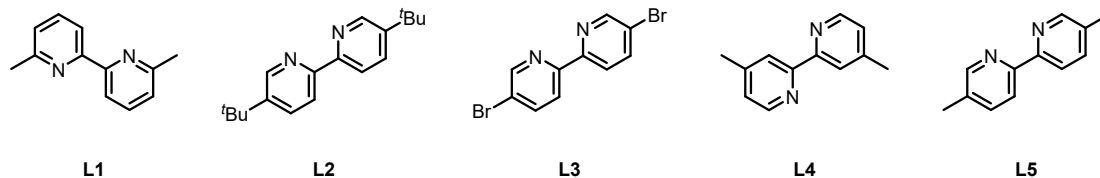

**Table S4. Screening of the leaving groups on the acylhydrazone for the synthesis of 3,5-disubstituted pyridazine.<sup>a,b</sup>**

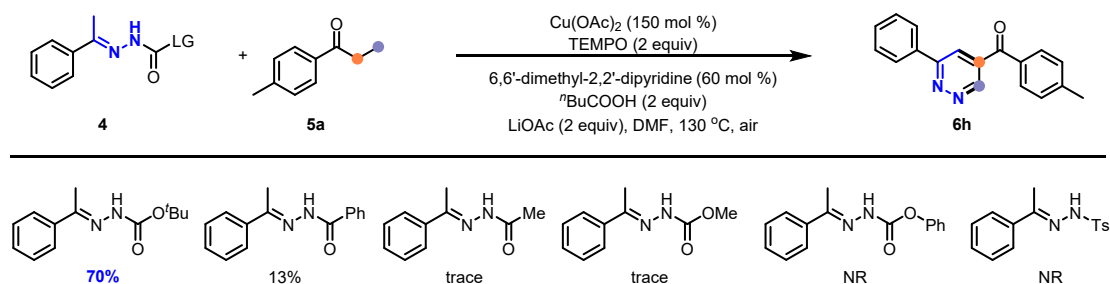

<sup>a</sup>Reaction Conditions: **4** (0.25 mmol), **5a** (0.2 mmol), Cu(OAc)<sub>2</sub> (150 mol%), TEMPO (2 equiv), 6,6'-dimethyl-2,2'-dipyridine (60 mol%), <sup>t</sup>C<sub>4</sub>H<sub>9</sub>COOH (2 equiv), LiOAc (2 equiv), DMF (2 mL), 130 °C, air, 12 h. <sup>b</sup>Isolated yields.

## 4. General Procedure for Accessing Polysubstituted Pyridazines.

### 4.1. General procedure for the synthesis of 3,4,6-triaryl pyridazines (**3a-3o**).

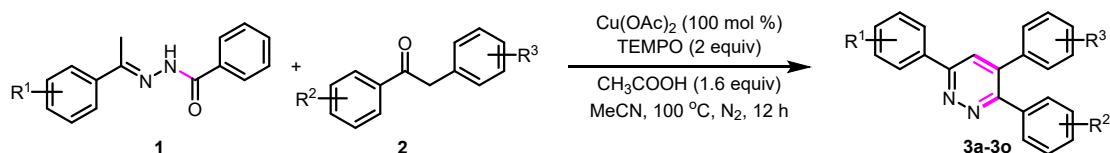

In a 25 mL Schlenk reaction tube with a stir bar, *N*-benzoylhydrazones (**1**) (0.3 mmol), substituted 2-phenylacetophenone (**2**) (0.2 mmol), Cu(OAc)<sub>2</sub> (0.2 mmol, 36.2 mg), TEMPO (0.4 mmol, 62.4 mg), HOAc (0.32 mmol) were dissolved in MeCN (2.0 mL) under a nitrogen atmosphere. The reaction mixture was then heated at 100 °C (oil bath) with vigorous stirring for 12 hours. After the reaction completion, the mixture was poured into ethyl acetate, and washed with saturated brine (1 × 40 mL). The combined organic layers were dried over anhydrous Na<sub>2</sub>SO<sub>4</sub> and evaporated under vacuum. The residue was purified by a silica gel packed flash chromatography column with petroleum ether/ethyl acetate (15:1) as the eluent to afford the desired 3,4,6-triarylpyridazines (**3a-3o**).

### 4.2. General procedure for the synthesis of *tert*-butyl 3-methyl-6-phenylpyridazine-4-carboxylate (**3p**).

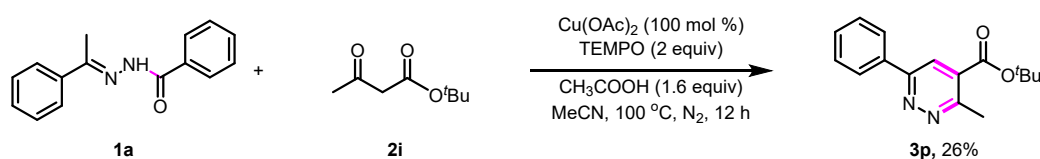

In a 25 mL Schlenk reaction tube with a stir bar, substituted acylhydrazones (**1a**) (0.3 mmol), *tert*-butyl 3-oxobutanoate (**2i**) (0.2 mmol), Cu(OAc)<sub>2</sub> (0.2 mmol, 36.2 mg),



TEMPO (0.4 mmol, 62.4 mg), HOAc (0.32 mmol) were dissolved in MeCN (2.0 mL) under a nitrogen atmosphere. The reaction mixture was then heated at 100 °C (oil bath) with vigorous stirring for 12 hours. After the reaction completion, the mixture was poured into ethyl acetate, and washed with saturated brine (1 × 40 mL). The combined organic layers were dried over anhydrous Na<sub>2</sub>SO<sub>4</sub> and evaporated under vacuum. The residue was purified by a silica gel packed flash chromatography column with petroleum ether/ethyl acetate (15:1) as the eluent to afford the desired tert-butyl 3-methyl-6-phenylpyridazine-4-carboxylate (**3p**) in a yield of 26%.

#### 4.3. General procedure for the synthesis of 3,5-disubstituted pyridazines (6a-6q).

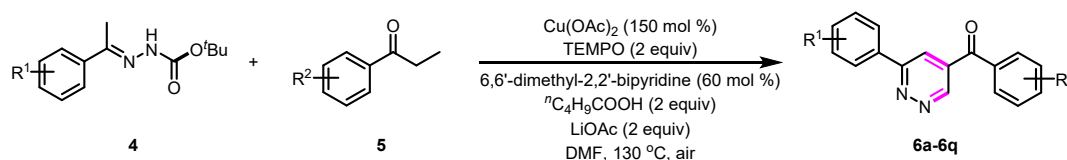

In a 25 mL Schlenk reaction tube with a stir bar, substituted acylhydrazone (**4**) (0.25 mmol), substituted propiophenone (**5**) (0.2 mmol), Cu(OAc)<sub>2</sub> (0.3 mmol, 54.3 mg), 6,6'-dimethyl-2,2'-bipyridine (0.12 mmol, 22.1 mg), TEMPO (0.4 mmol, 62.4 mg), LiOAc (0.4 mmol, 25.6 mg), *n*C<sub>4</sub>H<sub>9</sub>COOH (0.4 mmol, 40.8 mg) were dissolved in DMF (2 mL) under air atmosphere. The reaction mixture was then heated at 130 °C (oil bath) with vigorous stirring for 12 hours. After the reaction equilibrium, the mixture was poured into ethyl acetate and washed with saturated brine (3 × 10 mL). The combined organic layers were dried over anhydrous Na<sub>2</sub>SO<sub>4</sub> and evaporated under vacuum. The residue was purified by a silica gel packed flash chromatography column with petroleum ether/ethyl acetate (12:1) as the eluent to afford the desired 3-aryl-5-benzoylpyridazines products (**6a-6q**).

## 5. Analytical Data for All Products.

### 3,4,6-triphenylpyridazine (**3a**):

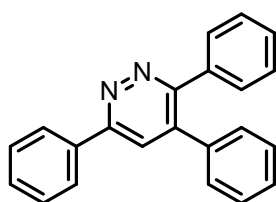

Yellow solid (55.4 mg, 90%). mp: 165-166 °C. Column chromatography on silica gel (Eluent: petroleum ether/ethyl acetate, 15/1). **<sup>1</sup>H NMR** (500 MHz, CDCl<sub>3</sub>) δ 8.20 (d, *J* = 7.5 Hz, 2H), 7.86 (s, 1H), 7.57-7.50 (m, 5H), 7.37-7.30 (m, 6H), 7.28-7.26 (m, 2H). **<sup>13</sup>C NMR** (125 MHz, CDCl<sub>3</sub>) δ 158.2, 157.8, 139.5, 137.2, 136.7, 136.2, 130.1, 129.1, 129.1, 128.8, 128.7, 128.1, 127.1, 124.8. **HRMS (ESI-TOF)** *m/z*: [M + H]<sup>+</sup> Calcd for C<sub>22</sub>H<sub>17</sub>N<sub>2</sub> 309.1386, Found 309.1374.

**3,4-diphenyl-6-(*p*-tolyl)pyridazine (3b):**

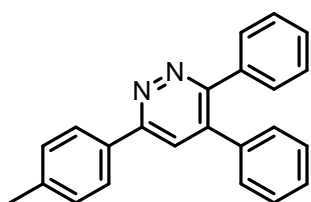

Yellow solid (53.5 mg, 83%). mp: 196-197 °C. Column chromatography on silica gel (Eluent: petroleum ether/ethyl acetate, 15/1). **<sup>1</sup>H NMR** (400 MHz, CDCl<sub>3</sub>) δ 8.15 (d, *J* = 7.5 Hz, 2H), 7.87 (s, 1H), 7.55 (d, *J* = 7.5 Hz, 2H), 7.42-7.30 (m, 10H), 2.49 (s, 3H). **<sup>13</sup>C NMR** (125 MHz, CDCl<sub>3</sub>) δ 158.3, 157.7, 139.5, 138.8, 136.9, 136.2, 134.2, 130.0, 130.0, 129.5, 129.0, 129.0, 128.7, 128.1, 127.1, 124.8, 21.3. **HRMS (ESI-TOF)** *m/z*: [M + H]<sup>+</sup> Calcd for C<sub>23</sub>H<sub>19</sub>N<sub>2</sub> 323.1543, Found 323.1545.

**6-(4-phenoxyphenyl)-3,4-diphenylpyridazine (3c):**

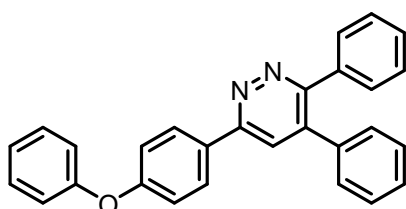

Yellow solid (66.4 mg, 83%). mp: 165-166 °C. Column chromatography on silica gel (Eluent: petroleum ether/ethyl acetate, 15/1). **<sup>1</sup>H NMR** (400 MHz, CDCl<sub>3</sub>) δ 8.26 (d, *J* = 8.4 Hz, 2H), 7.88 (s, 1H), 7.57 (d, *J* = 7.2 Hz, 2H), 7.48-7.33 (m, 10H), 7.24-7.17 (m, 5H). **<sup>13</sup>C NMR** (100 MHz, CDCl<sub>3</sub>) δ 159.5, 156.5, 137.3, 136.8, 130.9, 130.1, 130.0, 129.2, 128.8, 128.8, 128.7, 128.2, 124.4, 124.0, 119.6, 118.8. **HRMS (ESI-TOF)** *m/z*: [M + Na]<sup>+</sup> Calcd for C<sub>28</sub>H<sub>21</sub>N<sub>2</sub>O 423.1468, Found 423.1451.

**6-(4-fluorophenyl)-3,4-diphenylpyridazine (3d):**

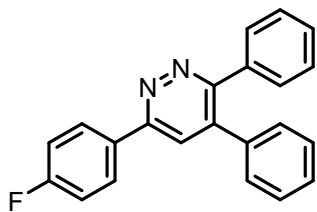

Yellow solid (54.1 mg, 83%). mp: 174-175 °C. Column chromatography on silica gel (Eluent: petroleum ether/ethyl acetate, 15/1). **<sup>1</sup>H NMR** (400 MHz, CDCl<sub>3</sub>) δ 8.10-8.06 (m, 2H), 7.70 (s, 1H), 7.39 (d, *J* = 7.2 Hz, 2H), 7.26-7.19 (m, 6H), 7.16-7.13 (m, 3H), 7.11-7.09 (m, 1H). **<sup>13</sup>C NMR** (125 MHz, CDCl<sub>3</sub>) δ 164.2 (d, *J*<sub>C-F</sub> = 248.8 Hz), 158.2, 156.8, 139.6, 137.1, 136.6, 132.3 (d, *J*<sub>C-F</sub> = 3.8 Hz), 130.0, 129.1, 129.0, 129.0, 128.8, 128.8, 128.2, 124.5, 116.1 (d, *J*<sub>C-F</sub> = 22.5 Hz). **HRMS (ESI-TOF)** *m/z*: [M + H]<sup>+</sup> Calcd for C<sub>22</sub>H<sub>16</sub>FN<sub>2</sub> 327.1292, Found 327.1321.

**6-(3-fluorophenyl)-3,4-diphenylpyridazine (3e):**

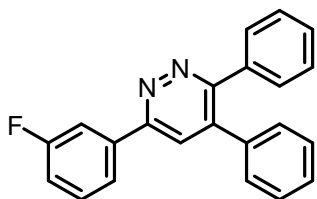

Yellow solid (51.5 mg, 79%). mp: 202-203 °C. Column chromatography on silica gel (Eluent: petroleum ether/ethyl acetate, 15/1). **<sup>1</sup>H NMR** (500 MHz, CDCl<sub>3</sub>) δ 7.87-7.84 (m, 2H), 7.73 (s, 1H), 7.41-7.38 (m, 3H), 7.27-7.24 (m, 4H), 7.23-7.21 (m, 2H), 7.17 (d, *J* = 7.0 Hz, 2H), 7.10 (t, *J* = 9.0 Hz, 1H). **<sup>13</sup>C NMR** (125 MHz, CDCl<sub>3</sub>) δ 163.4 (d, *J*<sub>C-F</sub> = 243.8 Hz), 158.7, 156.5, 139.6, 138.4 (d, *J*<sub>C-F</sub> = 7.5 Hz), 137.0, 136.6, 130.6 (d, *J*<sub>C-F</sub> = 7.5 Hz), 130.1, 129.1, 128.9, 128.9, 128.8, 128.2, 124.9, 122.6 (d, *J*<sub>C-F</sub> = 2.5 Hz), 117.0 (d, *J*<sub>C-F</sub> = 21.3 Hz), 114.1 (d, *J*<sub>C-F</sub> = 23.8 Hz). **HRMS (ESI-TOF)** *m/z*: [M + H]<sup>+</sup> Calcd for C<sub>22</sub>H<sub>16</sub>FN<sub>2</sub> 327.1292, Found 327.1313.

**6-(3-bromophenyl)-3,4-diphenylpyridazine (3f):**

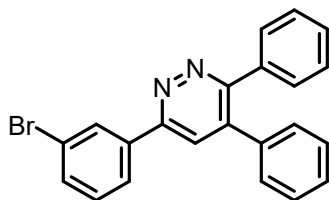

Yellow solid (57.3 mg, 74%). mp: 140-141 °C. Column chromatography on silica gel (Eluent: petroleum ether/ethyl acetate, 15/1). **<sup>1</sup>H NMR** (400 MHz, CDCl<sub>3</sub>) δ 8.26 (s,

1H), 8.04 (d,  $J = 7.6$  Hz, 1H), 7.73 (s, 1H), 7.54 (d,  $J = 8.0$  Hz, 1H), 7.41 (d,  $J = 8.0$  Hz, 2H), 7.34-7.30 (m, 1H), 7.30-7.22 (m, 6H), 7.17 (d,  $J = 3.6$  Hz, 2H).  $^{13}\text{C}$  NMR (125 MHz,  $\text{CDCl}_3$ )  $\delta$  138.2, 133.0, 130.6, 130.1, 130.0, 129.1, 128.9, 128.9, 128.8, 128.2, 125.6, 123.3. **HRMS (ESI-TOF)**  $m/z$ :  $[\text{M} + \text{H}]^+$  Calcd for  $\text{C}_{22}\text{H}_{16}\text{BrN}_2$  387.0491, Found 387.0475.

**6-(3-methoxyphenyl)-3,4-diphenylpyridazine (3g):**

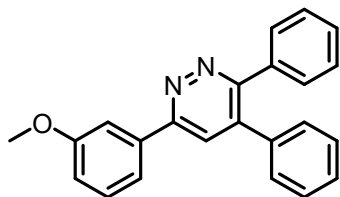

Yellow solid (54.8 mg, 81%). mp: 107-108 °C. Column chromatography on silica gel (Eluent: petroleum ether/ethyl acetate, 15/1).  $^1\text{H}$  NMR (400 MHz,  $\text{CDCl}_3$ )  $\delta$  7.77 (d,  $J = 12.0$  Hz, 2H), 7.59 (d,  $J = 7.6$  Hz, 1H), 7.42 (d,  $J = 7.6$  Hz, 2H), 7.34 (t,  $J = 8.0$  Hz, 1H), 7.28-7.17 (m, 8H), 6.97 (d,  $J = 8.4$  Hz, 1H), 3.82 (s, 3H).  $^{13}\text{C}$  NMR (100 MHz,  $\text{CDCl}_3$ )  $\delta$  160.3, 139.5, 137.5, 137.2, 136.8, 130.1, 130.1, 129.1, 128.8, 128.2, 125.0, 119.4, 116.5, 112.0, 55.5. **HRMS (ESI-TOF)**  $m/z$ :  $[\text{M} + \text{H}]^+$  Calcd for  $\text{C}_{23}\text{H}_{19}\text{N}_2\text{O}$  339.1492, Found 339.1509.

**6-(naphthalen-2-yl)-3,4-diphenylpyridazine (3h):**

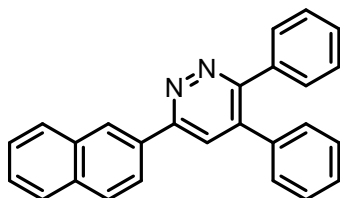

Yellow solid (59.4 mg, 83%). mp: 173-174 °C. Column chromatography on silica gel (Eluent: petroleum ether/ethyl acetate, 15/1).  $^1\text{H}$  NMR (400 MHz,  $\text{CDCl}_3$ )  $\delta$  8.67 (s, 1H), 8.37 (d,  $J = 8.4$  Hz, 1H), 8.03-7.97 (m, 3H), 7.91 (d,  $J = 4.4$  Hz, 1H), 7.56-7.53 (m, 4H), 7.40-7.29 (m, 8H).  $^{13}\text{C}$  NMR (125 MHz,  $\text{CDCl}_3$ )  $\delta$  158.2, 157.6, 139.5, 137.3, 136.8, 134.2, 133.4, 130.1, 129.1, 128.9, 128.9, 128.8, 128.8, 128.8, 128.8, 128.2, 127.8, 127.1, 126.9, 126.6, 125.0, 124.3. **HRMS (ESI-TOF)**  $m/z$ :  $[\text{M} + \text{H}]^+$  Calcd for  $\text{C}_{26}\text{H}_{19}\text{N}_2$  359.1543, Found 359.1532.

**3-(4-chlorophenyl)-4,6-diphenylpyridazine (3i):**

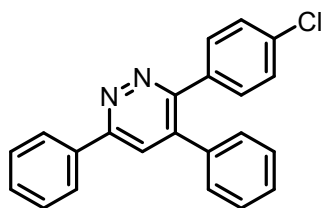

Yellow solid (50.7 mg, 74%). mp: 138-139 °C. Column chromatography on silica gel (Eluent: petroleum ether/ethyl acetate, 15/1). **<sup>1</sup>H NMR** (400 MHz, CDCl<sub>3</sub>) δ 8.08 (d, *J* = 7.2 Hz, 2H), 7.74 (s, 1H), 7.46-7.37 (m, 5H), 7.31-7.26 (m, 3H), 7.18-7.15 (m, 2H), 6.92-6.88 (m, 2H). **<sup>13</sup>C NMR** (125 MHz, CDCl<sub>3</sub>) δ 164.2, 162.2, 137.1, 136.0, 132.8, 132.0, 131.9, 130.1, 129.1, 129.0, 128.9, 128.9, 127.1, 124.9, 115.4, 115.2. **HRMS (ESI-TOF)** *m/z*: [M + H]<sup>+</sup> Calcd for C<sub>22</sub>H<sub>16</sub>ClN<sub>2</sub> 343.0997, Found 343.0997.

**3-(4-fluorophenyl)-4,6-diphenylpyridazine (3j):**

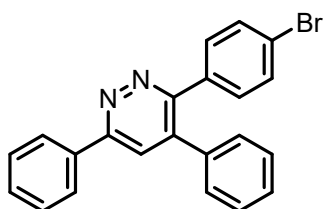

Yellow solid (55.7 mg, 72%). mp: 160-161 °C. Column chromatography on silica gel (Eluent: petroleum ether/ethyl acetate, 15/1). **<sup>1</sup>H NMR** (400 MHz, CDCl<sub>3</sub>) δ 8.27 (d, *J* = 7.2 Hz, 2H), 7.93 (s, 1H), 7.65-7.59 (m, 3H), 7.54 (d, *J* = 8.0 Hz, 2H), 7.48-7.46 (m, 3H), 7.38-7.34 (m, 4H). **<sup>13</sup>C NMR** (125 MHz, CDCl<sub>3</sub>) δ 157.9, 157.1, 139.4, 136.9, 136.0, 135.2, 135.1, 131.4, 130.2, 129.1, 129.0, 129.0, 129.0, 128.4, 127.1, 124.9. **HRMS (ESI-TOF)** *m/z*: [M + H]<sup>+</sup> Calcd for C<sub>22</sub>H<sub>16</sub>BrN<sub>2</sub> 387.0491, Found 387.0493.

**3-(4-(*tert*-butyl)phenyl)-4,6-diphenylpyridazine (3k):**

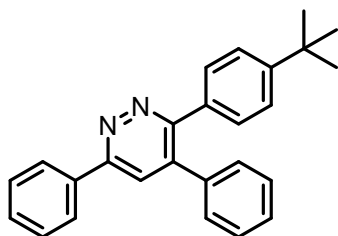

Yellow solid (42.2 mg, 58%). mp: 122-123 °C. Column chromatography on silica gel (Eluent: petroleum ether/ethyl acetate, 15/1). **<sup>1</sup>H NMR** (400 MHz, CDCl<sub>3</sub>) δ 8.09 (d, *J* = 6.8 Hz, 2H), 7.72 (s, 1H), 7.45-7.39 (m, 3H), 7.35 (d, *J* = 8.4 Hz, 2H), 7.28-7.18 (m, 7H), 1.21 (s, 9H). **<sup>13</sup>C NMR** (100 MHz, CDCl<sub>3</sub>) δ 158.1, 157.5, 152.0, 139.3, 137.5,

136.3, 133.7, 130.0, 129.8, 129.1, 129.1, 128.8, 128.7, 127.1, 125.1, 124.9, 34.7, 31.3.

**HRMS (ESI-TOF) m/z:**  $[M + Na]^+$  Calcd for  $C_{26}H_{24}N_2Na$  387.1832, Found 387.1858.

**4,6-diphenyl-3-(*m*-tolyl)pyridazine (3l):**

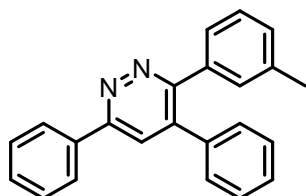

Yellow solid (39.3 mg, 61%). mp: 117-118 °C. Column chromatography on silica gel (Eluent: petroleum ether/ethyl acetate, 15/1). **<sup>1</sup>H NMR** (400 MHz,  $CDCl_3$ )  $\delta$  8.10 (d,  $J = 6.0$  Hz, 2H), 7.75 (s, 1H), 7.48-7.41 (m, 3H), 7.36 (s, 1H), 7.28-7.26 (m, 3H), 7.19-7.17 (m, 2H), 7.09-7.05 (m, 3H), 2.22 (s, 3H). **<sup>13</sup>C NMR** (125 MHz,  $CDCl_3$ )  $\delta$  137.9, 137.3, 136.6, 136.2, 130.7, 130.0, 129.5, 129.1, 129.1, 128.7, 128.7, 127.8, 127.2, 127.1, 124.8, 21.4. **HRMS (ESI-TOF) m/z:**  $[M + H]^+$  Calcd for  $C_{23}H_{19}N_2$  323.1543, Found 323.1511.

**3-(naphthalen-2-yl)-4,6-diphenylpyridazine (3m):**

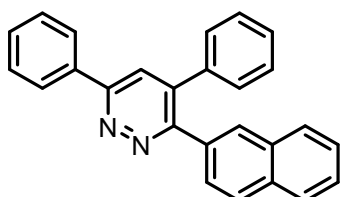

Yellow solid (59.4 mg, 83%). mp: 153-154 °C. Column chromatography on silica gel (Eluent: petroleum ether/ethyl acetate, 15/1). **<sup>1</sup>H NMR** (400 MHz,  $CDCl_3$ )  $\delta$  8.10 (d,  $J = 6.8$  Hz, 2H), 8.05 (s, 1H), 7.76 (s, 1H), 7.69-7.64 (m, 2H), 7.59 (d,  $J = 8.4$  Hz, 1H), 7.45-7.33 (m, 6H), 7.24-7.18 (m, 5H). **<sup>13</sup>C NMR** (100 MHz,  $CDCl_3$ )  $\delta$  158.1, 157.8, 139.7, 137.3, 136.2, 134.3, 133.3, 133.2, 130.1, 129.2, 129.1, 128.9, 128.8, 128.7, 127.7, 127.6, 127.3, 127.2, 126.8, 126.2, 124.9. **HRMS (ESI-TOF) m/z:**  $[M + H]^+$  Calcd for  $C_{26}H_{19}N_2$  359.1543, Found 359.1532.

**4-(4-fluorophenyl)-3,6-diphenylpyridazine (3n):**

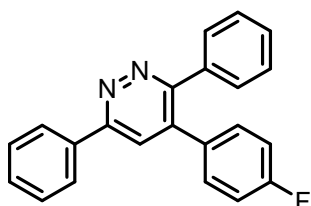

Yellow solid (29.3 mg, 45%). mp: 175-176 °C. Column chromatography on silica gel (Eluent: petroleum ether/ethyl acetate, 15/1). **<sup>1</sup>H NMR** (400 MHz, CDCl<sub>3</sub>) δ 8.17 (d, *J* = 8.0 Hz, 2H), 7.80 (s, 1H), 7.55-7.46 (m, 5H), 7.35-7.29 (m, 3H), 7.25-7.21 (m, 2H), 7.01-7.05 (m, 2H). **<sup>13</sup>C NMR** (125 MHz, CDCl<sub>3</sub>) δ 163.0 (d, *J*<sub>C-F</sub> = 248.8 Hz), 158.2, 157.8, 138.5, 136.6, 136.0, 133.2 (d, *J*<sub>C-F</sub> = 2.5 Hz), 131.0 (d, *J*<sub>C-F</sub> = 7.5 Hz), 130.2, 130.0, 129.1, 128.9, 128.3, 127.1, 124.7, 116.0 (d, *J*<sub>C-F</sub> = 21.3 Hz). **HRMS (ESI-TOF)** m/z: [M + H]<sup>+</sup> Calcd for C<sub>22</sub>H<sub>16</sub>FN<sub>2</sub> 327.1292, Found 327.1313.

**3,6-diphenyl-4-(*p*-tolyl)pyridazine (3o):**

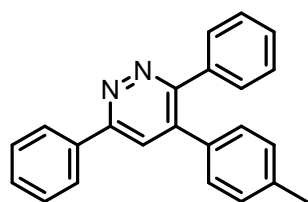

Yellow solid (47.0 mg, 73%). mp: 128-129 °C. Column chromatography on silica gel (Eluent: petroleum ether/ethyl acetate, 15/1). **<sup>1</sup>H NMR** (400 MHz, CDCl<sub>3</sub>) δ 8.18 (d, *J* = 8.0 Hz, 2H), 7.83 (s, 1H), 7.56-7.49 (m, 5H), 7.35-7.29 (m, 3H), 7.18-7.12 (m, 4H), 2.36 (s, 3H). **<sup>13</sup>C NMR** (125 MHz, CDCl<sub>3</sub>) δ 160.3, 158.3, 157.5, 139.5, 137.5, 137.2, 136.7, 130.1, 130.0, 129.1, 128.8, 128.1, 125.0, 119.3, 116.5, 111.9, 55.5. **HRMS (ESI-TOF)** m/z: [M + H]<sup>+</sup> Calcd for C<sub>23</sub>H<sub>19</sub>N<sub>2</sub> 323.1543, Found 323.1555.

**tert-butyl 3-methyl-6-phenylpyridazine-4-carboxylate (3p):**

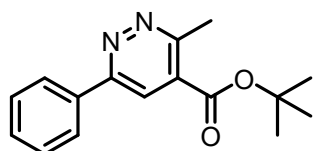

Yellow solid (14.0 mg, 26%). mp: 112-123 °C. Column chromatography on silica gel (Eluent: petroleum ether/ethyl acetate, 15/1). **<sup>1</sup>H NMR** (400 MHz, CDCl<sub>3</sub>) δ 8.12-8.09 (m, 3H), 7.55-7.48 (m, 3H), 2.98 (s, 3H), 1.64 (s, 9H). **<sup>13</sup>C NMR** (125 MHz, CDCl<sub>3</sub>) δ 164.7, 158.4, 156.7, 135.8, 130.4, 130.1, 129.1, 127.0, 123.5, 83.8, 28.2, 22.0. **HRMS (ESI-TOF)** m/z: [M + H]<sup>+</sup> Calcd for C<sub>16</sub>H<sub>19</sub>N<sub>2</sub>O<sub>2</sub> 271.1441, Found 271.1443.

**(6-(4-chlorophenyl)pyridazin-4-yl)(*p*-tolyl)methanone (6a):**

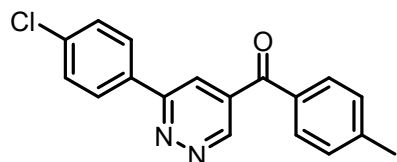

Yellow solid (46.9 mg, 76%). mp: 178-179 °C. Column chromatography on silica gel (Eluent: petroleum ether/ethyl acetate, 12/1). **<sup>1</sup>H NMR** (500 MHz, CDCl<sub>3</sub>) δ 9.36 (s, 1H), 8.09-8.06 (m, 3H), 7.75 (d, *J* = 7.6 Hz, 2H), 7.51 (d, *J* = 9.2 Hz, 2H), 7.35 (d, *J* = 7.6 Hz, 2H), 2.47 (s, 3H). **<sup>13</sup>C NMR** (125 MHz, CDCl<sub>3</sub>) δ 192.8, 158.8, 148.2, 145.7, 137.1, 135.6, 134.0, 132.7, 130.3, 129.8, 129.5, 128.5, 122.5, 21.9. **HRMS (ESI-TOF)** *m/z*: [M + H]<sup>+</sup> Calcd for C<sub>18</sub>H<sub>14</sub>ClN<sub>2</sub>O 309.0789, Found 309.0760.

**(6-(4-chlorophenyl)pyridazin-4-yl)(phenyl)methanone (6b):**

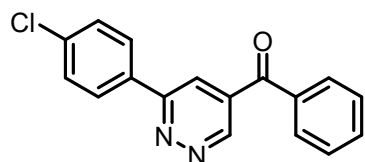

Yellow solid (35.3 mg, 60%). mp: 146-147 °C. Column chromatography on silica gel (Eluent: petroleum ether/ethyl acetate, 12/1). **<sup>1</sup>H NMR** (500 MHz, CDCl<sub>3</sub>) δ 9.38 (s, 1H), 8.14-8.08 (m, 3H), 7.86 (d, *J* = 8.0 Hz, 2H), 7.71 (t, *J* = 7.5 Hz, 1H), 7.57 (t, *J* = 7.5 Hz, 2H), 7.52 (d, *J* = 9.0 Hz, 2H). **<sup>13</sup>C NMR** (125 MHz, CDCl<sub>3</sub>) δ 193.2, 158.9, 148.1, 137.1, 135.2, 135.2, 134.4, 134.0, 130.1, 129.5, 129.1, 128.5, 122.5. **HRMS (ESI-TOF)** *m/z*: [M + H]<sup>+</sup> Calcd for C<sub>17</sub>H<sub>12</sub>ClN<sub>2</sub>O 295.0633, Found 295.0613.

**(6-(4-chlorophenyl)pyridazin-4-yl)(4-ethylphenyl)methanone (6c):**

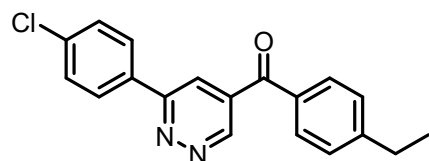

Yellow solid (35.4 mg, 55%). mp: 156-157 °C. Column chromatography on silica gel (Eluent: petroleum ether/ethyl acetate, 12/1). **<sup>1</sup>H NMR** (400 MHz, CDCl<sub>3</sub>) δ 9.36 (s, 1H), 8.09-8.06 (m, 3H), 7.78 (d, *J* = 6.0 Hz, 2H), 7.51 (d, *J* = 6.0 Hz, 2H), 7.38 (d, *J* = 6.4 Hz, 2H), 2.76 (q, *J* = 6.0 Hz, 2H), 1.30 (t, *J* = 6.0 Hz, 3H). **<sup>13</sup>C NMR** (125 MHz, CDCl<sub>3</sub>) δ 192.8, 158.8, 151.8, 148.2, 137.1, 135.6, 134.1, 132.9, 130.4, 129.5, 128.6, 128.5, 122.5, 29.1, 15.1. **HRMS (ESI-TOF)** *m/z*: [M + H]<sup>+</sup> Calcd for C<sub>19</sub>H<sub>16</sub>ClN<sub>2</sub>O



323.0946; Found 323.0938.

**(4-chlorophenyl)(6-(4-chlorophenyl)pyridazin-4-yl)methanone (6d):**

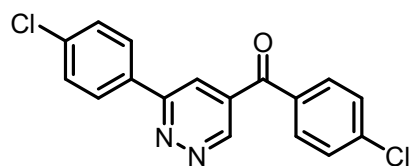

Yellow solid (41.4 mg, 63%). mp: 194-195 °C. Column chromatography on silica gel (Eluent: petroleum ether/ethyl acetate, 12/1). **<sup>1</sup>H NMR** (400 MHz, CDCl<sub>3</sub>) δ 9.36 (s, 1H), 8.09-8.05 (m, 3H), 7.81 (d, *J* = 8.8 Hz, 2H), 7.56-7.52 (m, 4H). **<sup>13</sup>C NMR** (125 MHz, CDCl<sub>3</sub>) δ 192.0, 159.0, 147.8, 141.2, 137.2, 134.9, 133.9, 133.5, 131.4, 129.5, 128.5, 122.3. **HRMS (ESI-TOF)** *m/z*: [M + H]<sup>+</sup> Calcd for C<sub>17</sub>H<sub>11</sub>Cl<sub>2</sub>N<sub>2</sub>O 329.0243; Found 329.0238.

**(6-(4-chlorophenyl)pyridazin-4-yl)(4-(trifluoromethyl)phenyl)methanone (6e):**

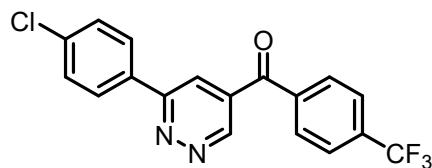

Yellow solid (34.8 mg, 48%). mp: 180-181 °C. Column chromatography on silica gel (Eluent: petroleum ether/ethyl acetate, 12/1). **<sup>1</sup>H NMR** (400 MHz, CDCl<sub>3</sub>) δ 9.38 (s, 1H), 8.09-8.08 (m, 3H), 7.97 (d, *J* = 8.0 Hz, 2H), 7.84 (d, *J* = 8.0 Hz, 2H), 7.53 (d, *J* = 8.4 Hz, 2H). **<sup>13</sup>C NMR** (125 MHz, CDCl<sub>3</sub>) δ 192.4, 159.1, 147.7, 138.0, 137.3, 135.5 (q, *J*<sub>C-F</sub> = 32.5 Hz), 134.2, 133.7, 130.3, 129.6, 128.5, 126.2 (q, *J*<sub>C-F</sub> = 2.5 Hz), 123.3 (q, *J*<sub>C-F</sub> = 271.2 Hz), 122.2. **HRMS (ESI-TOF)** *m/z*: [M + H]<sup>+</sup> Calcd for C<sub>18</sub>H<sub>11</sub>ClF<sub>3</sub>N<sub>2</sub>O 363.0507, Found 363.0532.

**(6-(4-chlorophenyl)pyridazin-4-yl)(3-methoxyphenyl)methanone (6f):**

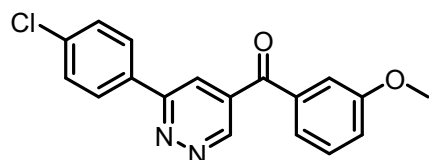

Yellow solid (31.8 mg, 49%). mp: 156-157 °C. Column chromatography on silica gel (Eluent: petroleum ether/ethyl acetate, 12/1). **<sup>1</sup>H NMR** (400 MHz, CDCl<sub>3</sub>) δ 9.39 (s, 1H), 8.12-8.09 (m, 3H), 7.53 (d, *J* = 8.0 Hz, 2H), 7.47-7.43 (m, 2H), 7.34 (d, *J* = 7.2

Hz, 1H), 7.28-7.24 (m, 1H), 3.89 (s, 3H). <sup>13</sup>C NMR (125 MHz, CDCl<sub>3</sub>) δ 193.0, 160.2, 158.9, 148.1, 137.1, 136.5, 135.3, 134.0, 130.0, 129.5, 128.5, 123.0, 122.5, 120.9, 114.0, 55.6. HRMS (ESI-TOF) m/z: [M + H]<sup>+</sup> Calcd for C<sub>18</sub>H<sub>14</sub>ClN<sub>2</sub>O<sub>2</sub> 325.0738, Found 325.0714.

**phenyl(6-phenylpyridazin-4-yl)methanone (6g):**

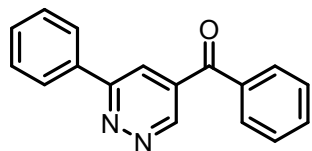

Yellow solid (33.3 mg, 64%). mp: 130-131 °C. Column chromatography on silica gel (Eluent: petroleum ether/ethyl acetate, 12/1). <sup>1</sup>H NMR (500 MHz, CDCl<sub>3</sub>) δ 9.39 (s, 1H), 8.14-8.12 (m, 2H), 8.10 (s, 1H), 7.86 (d, *J* = 7.5 Hz, 2H), 7.71 (t, *J* = 7.0 Hz, 1H), 7.58-7.53 (m, 5H). <sup>13</sup>C NMR (125 MHz, CDCl<sub>3</sub>) δ 193.4, 160.0, 148.0, 135.6, 135.3, 135.1, 134.3, 130.7, 130.1, 129.2, 129.1, 127.3, 122.8. HRMS (ESI-TOF) m/z: [M + H]<sup>+</sup> Calcd for C<sub>17</sub>H<sub>13</sub>N<sub>2</sub>O 261.1022, Found 261.1033.

**(6-phenylpyridazin-4-yl)(*p*-tolyl)methanone (6h):**

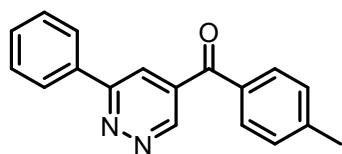

Yellow solid (38.4 mg, 70%). mp: 170-171 °C. Column chromatography on silica gel (Eluent: petroleum ether/ethyl acetate, 12/1). <sup>1</sup>H NMR (500 MHz, CDCl<sub>3</sub>) δ 9.38 (s, 1H), 8.14 (d, *J* = 8.0 Hz, 2H), 8.08 (s, 1H), 7.77 (d, *J* = 8.0 Hz, 2H), 7.57-7.54 (m, 3H), 7.36 (d, *J* = 8.0 Hz, 2H), 2.48 (s, 3H). <sup>13</sup>C NMR (125 MHz, CDCl<sub>3</sub>) δ 193.0, 159.9, 148.0, 145.6, 135.7, 135.5, 132.8, 130.6, 130.3, 129.8, 129.2, 127.3, 122.8, 21.9. HRMS (ESI-TOF) m/z: [M + H]<sup>+</sup> Calcd for C<sub>18</sub>H<sub>15</sub>N<sub>2</sub>O 275.1179, Found 275.1186.

***p*-tolyl(6-(*p*-tolyl)pyridazin-4-yl)methanone (6i):**

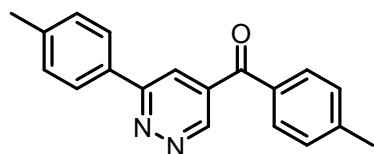

Yellow solid (30.0 mg, 52%). mp: 164-165 °C. Column chromatography on silica gel (Eluent: petroleum ether/ethyl acetate, 12/1). <sup>1</sup>H NMR (500 MHz, CDCl<sub>3</sub>) δ 9.33 (s, 1H), 8.05-8.02 (m, 3H), 7.76 (d, *J* = 8.5 Hz, 2H), 7.36-7.34 (m, 4H), 2.47 (s, 3H), 2.44

(s, 3H).  $^{13}\text{C}$  NMR (125 MHz,  $\text{CDCl}_3$ )  $\delta$  193.0, 159.8, 147.7, 145.5, 141.0, 135.4, 132.9, 132.8, 130.3, 129.9, 129.7, 127.2, 122.4, 21.8, 21.4. HRMS (ESI-TOF)  $m/z$ :  $[\text{M} + \text{H}]^+$  Calcd for  $\text{C}_{19}\text{H}_{17}\text{N}_2\text{O}$  289.1335, Found 289.1358.

**(6-(4-methoxyphenyl)pyridazin-4-yl)(*p*-tolyl)methanone (6j):**

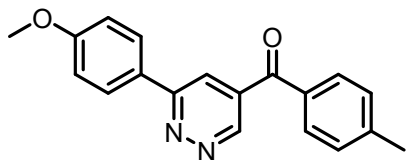

Yellow solid (45.6 mg, 75%). mp: 153-154 °C. Column chromatography on silica gel (Eluent: petroleum ether/ethyl acetate, 12/1).  $^1\text{H}$  NMR (400 MHz,  $\text{CDCl}_3$ )  $\delta$  9.30 (s, 1H), 8.10 (d,  $J = 8.8$  Hz, 2H), 8.02 (s, 1H), 7.76 (d,  $J = 8.0$  Hz, 2H), 7.35 (d,  $J = 7.6$  Hz, 2H), 7.04 (d,  $J = 8.8$  Hz, 2H), 3.88 (s, 3H), 2.47 (s, 3H).  $^{13}\text{C}$  NMR (125 MHz,  $\text{CDCl}_3$ )  $\delta$  193.1, 161.8, 159.4, 147.4, 145.5, 135.4, 132.8, 130.3, 129.7, 128.7, 128.0, 122.0, 114.6, 55.5, 21.9. HRMS (ESI-TOF)  $m/z$ :  $[\text{M} + \text{H}]^+$  Calcd for  $\text{C}_{19}\text{H}_{17}\text{N}_2\text{O}_2$  305.1285, Found 305.1297.

**(6-(4-phenoxyphenyl)pyridazin-4-yl)(*p*-tolyl)methanone (6k):**

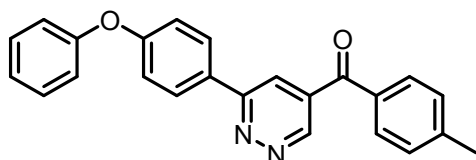

Yellow solid (40.3 mg, 55%). mp: 130-131 °C. Column chromatography on silica gel (Eluent: petroleum ether/ethyl acetate, 12/1).  $^1\text{H}$  NMR (500 MHz,  $\text{CDCl}_3$ )  $\delta$  8.19 (d,  $J = 7.5$  Hz, 2H), 7.84 (s, 1H), 7.55-7.51 (m, 5H), 7.35-7.30 (m, 3H), 7.16-7.15 (m, 4H), 2.37 (s, 3H).  $^{13}\text{C}$  NMR (125 MHz,  $\text{CDCl}_3$ )  $\delta$  196.2, 158.3, 157.7, 139.5, 138.8, 137.0, 136.2, 134.2, 130.0, 130.0, 129.5, 129.0, 129.0, 128.7, 128.1, 127.1, 124.8, 21.3. HRMS (ESI-TOF)  $m/z$ :  $[\text{M} + \text{H}]^+$  Calcd for  $\text{C}_{24}\text{H}_{19}\text{N}_2\text{O}_2$  367.1441, Found 367.1479.

**(6-(4-fluorophenyl)pyridazin-4-yl)(*p*-tolyl)methanone (6l):**

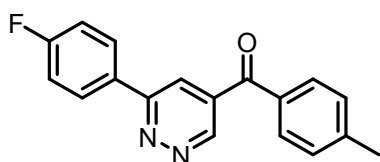

Yellow solid (34.5 mg, 59%). mp: 146-147 °C. Column chromatography on silica gel (Eluent: petroleum ether/ethyl acetate, 12/1).  $^1\text{H}$  NMR (400 MHz,  $\text{CDCl}_3$ )  $\delta$  9.43 (s,

1H), 8.22-8.17 (m, 2H), 8.12 (s, 1H), 7.82 (d,  $J = 6.4$  Hz, 2H), 7.42 (d,  $J = 6.8$  Hz, 2H), 7.32-7.27 (m, 2H), 2.54 (s, 3H).  $^{13}\text{C}$  NMR (125 MHz,  $\text{CDCl}_3$ )  $\delta$  192.9, 164.5 (d,  $J_{\text{C-F}} = 250.0$  Hz), 148.0, 145.7, 135.7, 132.7, 131.8 (d,  $J_{\text{C-F}} = 3.8$  Hz), 130.3, 129.8, 129.3 (d,  $J_{\text{C-F}} = 8.8$  Hz), 122.4, 116.3 (d,  $J_{\text{C-F}} = 21.3$  Hz), 21.9. **HRMS (ESI-TOF)**  $m/z$ :  $[\text{M} + \text{H}]^+$  Calcd for  $\text{C}_{18}\text{H}_{14}\text{FN}_2\text{O}$  293.1085, Found 293.1064.

***p*-tolyl(6-(4-(trifluoromethyl)phenyl)pyridazin-4-yl)methanone (6m):**

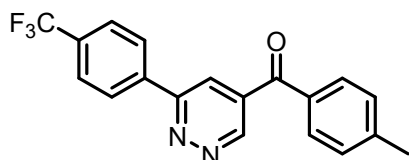

Yellow solid (41.0 mg, 60%). mp: 196-197 °C. Column chromatography on silica gel (Eluent: petroleum ether/ethyl acetate, 12/1).  $^1\text{H}$  NMR (400 MHz,  $\text{CDCl}_3$ )  $\delta$  9.42 (s, 1H), 8.27 (d,  $J = 8.0$  Hz, 2H), 8.13 (s, 1H), 7.79 (q,  $J = 8.8$  Hz, 4H), 7.37 (d,  $J = 8.0$  Hz, 2H), 2.49 (s, 3H).  $^{13}\text{C}$  NMR (125 MHz,  $\text{CDCl}_3$ )  $\delta$  192.6, 158.6, 148.6, 145.8, 139.0, 135.7, 132.6, 132.4 (q,  $J_{\text{C-F}} = 32.5$  Hz), 130.3, 129.8, 127.6, 126.1 (q,  $J_{\text{C-F}} = 3.8$  Hz), 123.9 (q,  $J_{\text{C-F}} = 270.0$  Hz), 123.0, 21.9. **HRMS (ESI-TOF)**  $m/z$ :  $[\text{M} + \text{H}]^+$  Calcd for  $\text{C}_{19}\text{H}_{14}\text{F}_3\text{N}_2\text{O}$  343.1053, Found 343.1066.

**6-(3-fluorophenyl)pyridazin-4-yl(*p*-tolyl)methanone (6n):**

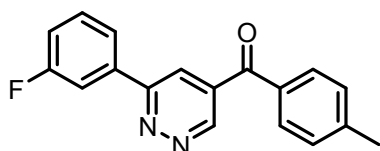

Yellow solid (25.1 mg, 43%). mp: 124-125 °C. Column chromatography on silica gel (Eluent: petroleum ether/ethyl acetate, 12/1).  $^1\text{H}$  NMR (500 MHz,  $\text{CDCl}_3$ )  $\delta$  9.39 (s, 1H), 8.09 (s, 1H), 7.95-7.90 (m, 2H), 7.80-7.77 (m, 2H), 7.53 (s, 1H), 7.42-7.36 (m, 2H), 7.29-7.23 (m, 1H), 2.50 (s, 3H).  $^{13}\text{C}$  NMR (125 MHz,  $\text{CDCl}_3$ )  $\delta$  192.7, 163.4 (d,  $J_{\text{C-F}} = 245.0$  Hz), 158.7, 148.4, 145.7, 137.9, 135.6, 132.7, 130.8 (d,  $J_{\text{C-F}} = 7.5$  Hz), 130.3, 129.8, 122.8 (d,  $J_{\text{C-F}} = 32.5$  Hz), 117.6 (d,  $J_{\text{C-F}} = 20.0$  Hz), 114.3 (d,  $J_{\text{C-F}} = 25.0$  Hz), 21.8. **HRMS (ESI-TOF)**  $m/z$ :  $[\text{M} + \text{H}]^+$  Calcd for  $\text{C}_{18}\text{H}_{14}\text{FN}_2\text{O}$  293.1085, Found 293.1081.

**6-(3-methoxyphenyl)pyridazin-4-yl(*p*-tolyl)methanone (6o):**

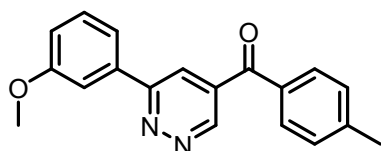

Yellow solid (25.5 mg, 42%). mp: 144-145°C. Column chromatography on silica gel (Eluent: petroleum ether/ethyl acetate, 12/1). **<sup>1</sup>H NMR** (500 MHz, CDCl<sub>3</sub>) δ 9.36 (s, 1H), 8.06 (s, 1H), 7.78-7.75 (m, 3H), 7.62 (d, *J* = 7.5 Hz, 1H), 7.44 (d, *J* = 8.0 Hz, 1H), 7.36 (t, *J* = 8.0 Hz, 2H), 7.07 (d, *J* = 8.0 Hz, 1H), 3.91 (s, 3H), 2.47 (s, 3H). **<sup>13</sup>C NMR** (125 MHz, CDCl<sub>3</sub>) δ 192.9, 160.4, 159.6, 148.1, 145.6, 137.0, 135.5, 132.8, 130.3, 130.2, 129.8, 122.8, 119.5, 116.9, 112.3, 55.5, 21.8. **HRMS (ESI-TOF)** *m/z*: [M + H]<sup>+</sup> Calcd for C<sub>19</sub>H<sub>17</sub>N<sub>2</sub>O<sub>2</sub> 305.1285, Found 305.1294.

**(6-(naphthalen-2-yl)pyridazin-4-yl)(p-tolyl)methanone (6p):**

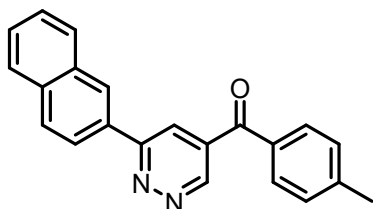

Yellow solid (31.8 mg, 49%). mp: 189-190 °C. Column chromatography on silica gel (Eluent: petroleum ether/ethyl acetate, 12/1). **<sup>1</sup>H NMR** (500 MHz, CDCl<sub>3</sub>) δ 9.40 (s, 1H), 8.61 (s, 1H), 8.29 (d, *J* = 8.5 Hz, 1H), 8.23 (s, 1H), 8.01 (d, *J* = 9.0 Hz, 1H), 7.97 (d, *J* = 8.0 Hz, 1H), 7.91 (d, *J* = 7.0 Hz, 1H), 7.80 (d, *J* = 8.0 Hz, 2H), 7.57- 7.55 (m, 2H), 7.37 (d, *J* = 8.0 Hz, 2H), 2.49 (s, 3H). **<sup>13</sup>C NMR** (125 MHz, CDCl<sub>3</sub>) δ 193.0, 159.9, 148.0, 145.6, 135.6, 134.4, 133.4, 132.9, 132.8, 130.3, 129.8, 129.1, 128.9, 127.8, 127.5, 127.4, 126.8, 124.1, 122.9, 21.8. **HRMS (ESI-TOF)** *m/z*: [M + H]<sup>+</sup> Calcd for C<sub>22</sub>H<sub>17</sub>N<sub>2</sub>O 325.1335, Found 325.1302.

**(6-(benzo[*b*]thiophen-2-yl)pyridazin-4-yl)(p-tolyl)methanone (6q):**

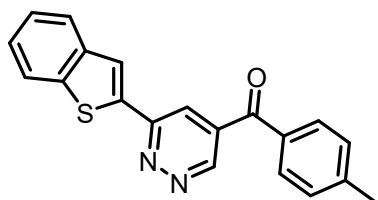

Yellow solid (13.9 mg, 21%). mp: 178-179 °C. Column chromatography on silica gel (Eluent: petroleum ether/ethyl acetate, 12/1). **<sup>1</sup>H NMR** (400 MHz, CDCl<sub>3</sub>) δ 9.32 (s, 1H), 8.14 (s, 1H), 7.99 (s, 1H), 7.93-7.90 (m, 1H), 7.86-7.83 (m, 1H), 7.79-7.77 (d, *J* =

8.0 Hz, 2H), 7.42-7.37 (m, 4H), 2.49 (s, 3H).  $^{13}\text{C}$  NMR (125 MHz,  $\text{CDCl}_3$ )  $\delta$  192.6, 148.2, 145.7, 141.5, 140.0, 139.8, 135.3, 132.7, 130.3, 129.8, 126.2, 124.9, 124.6, 124.0, 122.8, 121.7, 21.9. **HRMS (ESI-TOF)**  $m/z$ :  $[\text{M} + \text{H}]^+$  Calcd for  $\text{C}_{20}\text{H}_{15}\text{N}_2\text{OS}$  331.0900, Found 331.0929.

## 6. Synthetic Applications.

### 6.1. Gram-scale reaction for the synthesis of triphenyl pyridazine (3a).

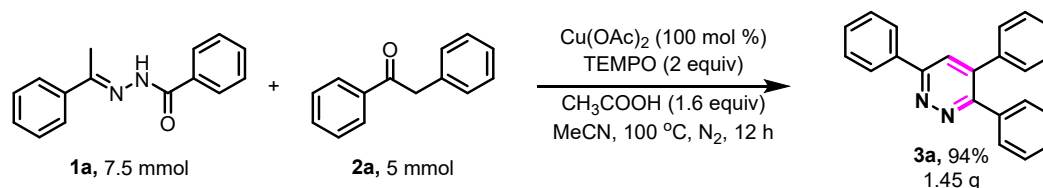

In a 100 mL Schlenk reaction tube with a stir bar, benzoylhydrazone (**1a**) (7.5 mmol, 1.79 g), 2-phenylacetophenone (**2a**) (5 mmol, 0.98 g),  $\text{Cu}(\text{OAc})_2$  (5 mmol, 0.905 g), TEMPO (10 mmol, 1.56 g), HOAc (8 mmol, 1 mL) were dissolved in MeCN (50 mL) under a nitrogen atmosphere. The reaction mixture was then heated at 100 °C (oil bath) with vigorous stirring for 12 hours. After the reaction equilibrium, the mixture was poured into ethyl acetate, and was washed with saturated brine (1 × 40 mL). The combined organic layers were dried over anhydrous  $\text{Na}_2\text{SO}_4$  and evaporated under vacuum. The residue was purified by a silica gel packed flash chromatography column with petroleum ether/ethyl acetate (15:1) as the eluent to afford the desired product **3a** within a 94% yield.

### 6.2. Gram-scale reaction for the synthesis of disubstituted pyridazine (6a)

*Gram-scale reactions:*

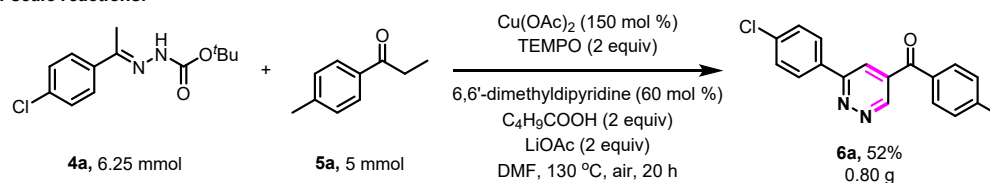

In a 100 mL Schlenk reaction tube with a stir bar, acylhydrazone (**4a**) (6.25 mmol, 1.68 g), 4'-methylpropiophenone (**5a**) (5 mmol, 0.67 g),  $\text{Cu}(\text{OAc})_2$  (7.5 mmol, 1.36 g), 6,6'-dimethyldipyridine (3 mmol, 0.55 g), TEMPO (10 mmol, 1.56g), LiOAc (10 mmol, 0.65 g),  $n\text{C}_4\text{H}_9\text{COOH}$  (10 mmol, 1.02 g) were dissolved in DMF (50 mL) under air atmosphere. The reaction mixture was then heated at 130 °C (oil bath) with vigorous stirring for 20 hours. After the reaction equilibrium, the mixture was poured into ethyl

acetate and was washed with saturated brine ( $3 \times 50$  mL). The combined organic layers were dried over anhydrous  $\text{Na}_2\text{SO}_4$  and evaporated under vacuum. The residue was purified by a silica gel packed flash chromatography column with petroleum ether/ethyl acetate (12:1) as the eluent to afford the desired products **6a** within 52% yield.

### 6.3. Cross-coupling of the resulting pyridazines **3f** with phenyl boronic acid.<sup>9</sup>

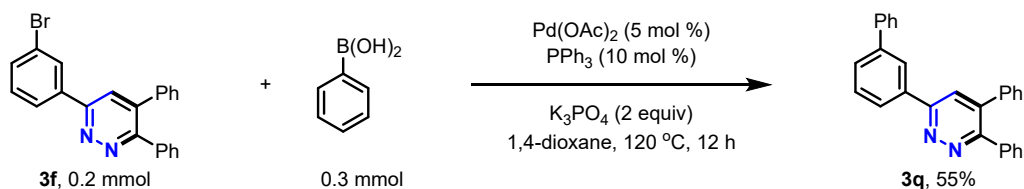

According to the reported reference:<sup>9</sup> in a 10 mL Schlenk reaction tube with a stir bar, the as-prepared pyridazine **3f** (0.2 mmol, 77.2 mg), phenyl boronic acid (36.6 mg, 0.3 mmol),  $\text{Pd}(\text{OAc})_2$  (2.24 mg, 0.01 mmol),  $\text{PPh}_3$  (5.24 mg, 0.02 mmol) and  $\text{K}_3\text{PO}_4$  (84.9 mg, 0.4 mmol) were dissolved in 1,4-dioxane (2 mL). The reaction mixture was then heated at 120 °C (oil bath) with vigorous stirring for 12 hours under air atmosphere. After the reaction equilibrium, the mixture was poured into ethyl acetate and then brine ( $2 \times 10$  mL). After the aqueous layer was extracted with ethyl acetate, the combined organic layers were dried over anhydrous  $\text{Na}_2\text{SO}_4$  and evaporated under vacuum. The filtrate was concentrated in vacuo and purified by a silica gel packed flash chromatography column with petroleum ether/ethyl acetate (10:1) as the eluent to afford the desired product 6-(1,1'-biphenyl-3-yl)-3,4-diphenylpyridazine **3q**.

White solid (42.3 mg, 55%). mp: 141.9-143.2 °C. Column chromatography on silica gel (Eluent: petroleum ether/ethyl acetate, 10/1).  $^1\text{H NMR}$  (400 MHz,  $\text{CDCl}_3$ )  $\delta$  8.44 (s, 1H), 8.14 (d,  $J = 8.0$  Hz, 1H), 7.90 (s, 1H), 7.73 (d,  $J = 7.6$  Hz, 1H), 7.70 (d,  $J = 7.6$  Hz, 2H), 7.60 (t,  $J = 8.0$  Hz, 1H), 7.51 (d,  $J = 7.2$  Hz, 2H), 7.46 (t,  $J = 7.6$  Hz, 2H), 7.39-7.27 (m, 8H), 7.24 (s, 1H).  $^{13}\text{C NMR}$  (100 MHz,  $\text{CDCl}_3$ )  $\delta$  142.1, 140.7, 137.2, 136.8, 136.7, 130.1, 129.6, 129.2, 129.0, 128.9, 128.8, 128.8, 128.2, 127.4, 127.2, 126.0, 125.0. **HRMS (ESI-TOF)** m/z:  $[\text{M} + \text{H}]^+$  Calcd for  $\text{C}_{28}\text{H}_{21}\text{N}_2$  385.1705, Found 385.1710.

### 6.4. Wittig reaction of the pyridazine product **6a**.<sup>10</sup>

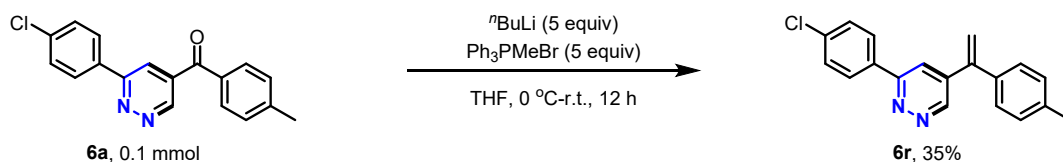

According to the reported reference:<sup>10</sup> under nitrogen atmosphere, a suspension of  $\text{Ph}_3\text{PMeBr}$  (357 mg, 1 mmol, 5.0 equiv) in THF (2.0 mL) was added  ${}^n\text{BuLi}$  (2.4 M in hexane, 0.42 mL, 1 mmol, 5.0 equiv) at 0 °C (ice bath), and the mixture was stirred at 0 °C for 30 min to yield a yellow mixture. A solution of the targeted pyridazine **6a** (62.2 mg, 0.20 mmol, 1.0 equiv) in THF (2.0 mL) was added at 0 °C. The reaction mixture was stirred at room temperature for 12 h. The resulting solution was quenched with saturated  $\text{NH}_4\text{Cl}$  solution and extracted with ethyl acetate ( $3 \times 10$  mL). The combined organic phases were dried over anhydrous  $\text{Na}_2\text{SO}_4$ , filtrated and concentrated in vacuo, and the residue was purified by column chromatography on silica gel (PE/EtOAc = 5:1) to give the corresponding product **6r**.

White solid (21.4 mg, 35%). mp: 149.6-151.0 °C. Column chromatography on silica gel (Eluent: petroleum ether/ethyl acetate, 5/1).  **$^1\text{H NMR}$**  (400 MHz,  $\text{CDCl}_3$ )  $\delta$  9.16 (d,  $J = 2.0$  Hz, 1H), 8.01 (d,  $J = 8.4$  Hz, 2H), 7.70 (d,  $J = 2$  Hz, 1H), 7.48 (d,  $J = 8.4$  Hz, 2H), 7.21 (s, 4H), 5.76 (s, 1H), 5.72 (s, 1H), 2.40 (s, 3H).  **$^{13}\text{C NMR}$**  (100 MHz,  $\text{CDCl}_3$ )  $\delta$  158.2, 149.5, 145.0, 140.2, 139.0, 136.5, 135.6, 134.8, 129.6, 129.3, 128.5, 127.9, 122.1, 118.4, 21.3. **HRMS (ESI-TOF)**  $m/z$ :  $[\text{M} + \text{H}]^+$  Calcd for  $\text{C}_{19}\text{H}_{16}\text{ClN}_2$  307.0997, Found 307.1003.

## 7. Mechanistic Investigations.

### 7.1. Mechanistic studies for the synthesis of 3,4,6-triaryl pyridazines.

#### 7.1.1. Radical-trapping experiments.

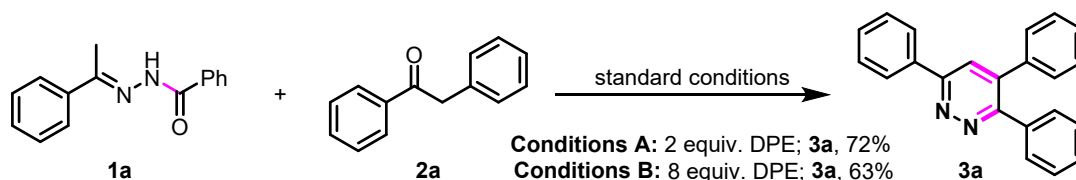

**Conditions A:** In a 25 mL Schlenk reaction tube with a stir bar, acylhydrazone (**1a**) (0.3 mmol, 71.4 mg), 2-phenylacetophenone (**2a**) (0.2 mmol, 39.2 mg),  $\text{Cu}(\text{OAc})_2$  (0.2 mmol, 36.2 mg), TEMPO (0.4 mmol, 62.4 mg), HOAc (0.32 mmol), and radical-



scavenger DPE (0.4 mmol, 72.1 mg) were dissolved in MeCN (2 mL) under a nitrogen atmosphere. The reaction mixture was then heated at 100 °C (oil bath) with vigorous stirring for 12 hours. After the reaction equilibrium, the mixture was poured into ethyl acetate and washed with saturated brine (1 × 40 mL). The combined organic layers were dried over anhydrous Na<sub>2</sub>SO<sub>4</sub>. The filtrate was concentrated in vacuo and purified by a silica gel packed flash chromatography column with petroleum ether/ethyl acetate (15:1) as the eluent to afford the desired products **3a** in a 72% yield.

**Conditions B:** In a 25 mL Schlenk reaction tube with a stir bar, acylhydrazone (**1a**) (0.3 mmol, 71.4 mg), 2-phenylacetophenone (**2a**) (0.2 mmol, 39.2 mg), Cu(OAc)<sub>2</sub> (0.2 mmol, 36.2 mg), TEMPO (0.4 mmol, 62.4 mg), HOAc (0.32 mmol), and radical-scavenger DPE (1.6 mmol, 288.4 mg) were dissolved in MeCN (2 mL) under a nitrogen atmosphere. The reaction mixture was then heated at 100 °C (oil bath) with vigorous stirring for 12 hours. After the reaction equilibrium, the mixture was poured into ethyl acetate and washed with saturated brine (1 × 40 mL). The combined organic layers were dried over anhydrous Na<sub>2</sub>SO<sub>4</sub>. The filtrate was concentrated in vacuo and purified by a silica gel packed flash chromatography column with petroleum ether/ethyl acetate (15:1) as the eluent to afford the desired products **3a** in a 63% yield. These results revealed that radical process might not be involved in this cascade annulation.

### 7.1.2. Deuterium-labeling experiments.

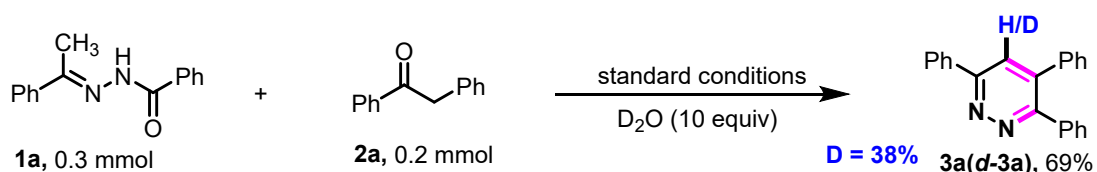

In a 25 mL Schlenk reaction tube with a stir bar, acylhydrazone (**1a**) (0.3 mmol, 71.4 mg), 2-phenylacetophenone (**2a**) (0.2 mmol, 39.2 mg), Cu(OAc)<sub>2</sub> (0.2 mmol, 36.2 mg), TEMPO (0.4 mmol, 62.4 mg), HOAc (0.32 mmol) and D<sub>2</sub>O (2 mmol, 40 mg) were dissolved in MeCN (2 mL) under a nitrogen atmosphere. The reaction mixture was then heated at 100 °C (oil bath) with vigorous stirring for 12 hours. After the reaction equilibrium, the mixture was poured into ethyl acetate and washed with saturated brine (1 × 40 mL). The combined organic layers were dried over anhydrous Na<sub>2</sub>SO<sub>4</sub>. The

filtrate was concentrated in vacuo and purified by a silica gel packed flash chromatography column with petroleum ether/ethyl acetate (15:1) as the eluent to afford the desired pyridazine product **3a(d-3a)** in a 69% yield. It was found that a 38% deuteration was detected on the C-H bond of pyridazine aromatic ring, revealing that the C(sp<sup>3</sup>)-H bond cleavage of acylhydrazone was reversible.

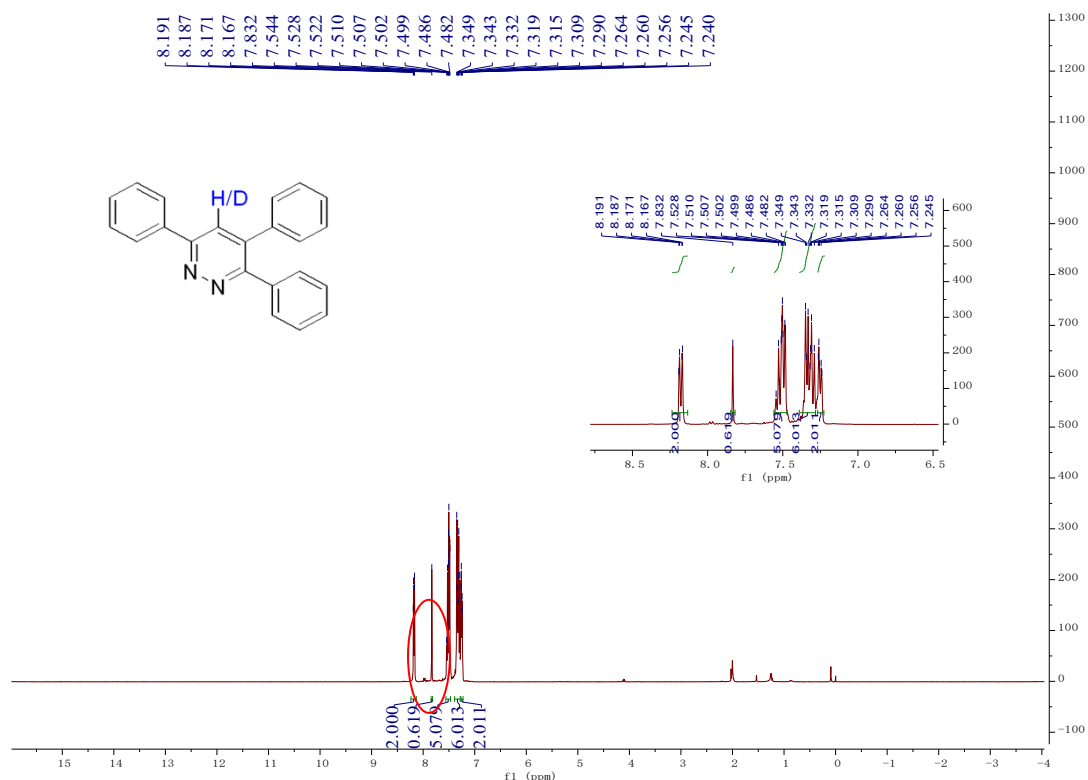

**Figure S1.** The <sup>1</sup>H NMR spectrum of pyridazine product **3a(d-3a)** from the model reaction in the presence of D<sub>2</sub>O

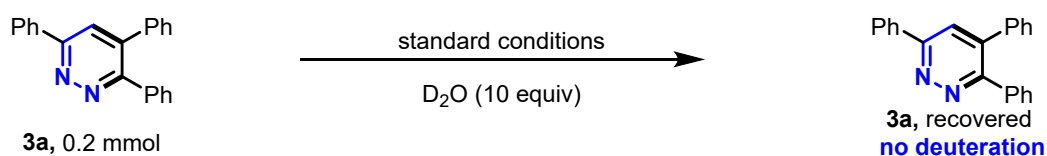

In a 25 mL Schlenk reaction tube with a stir bar, pyridazine product (**3a**) (0.2 mmol, 71.4 mg), Cu(OAc)<sub>2</sub> (0.2 mmol, 36.2 mg), TEMPO (0.4 mmol, 62.4 mg), HOAc (0.32 mmol) and D<sub>2</sub>O (2 mmol, 40 mg) were dissolved in MeCN (2 mL) under a nitrogen atmosphere. The reaction mixture was then heated at 100 °C (oil bath) with vigorous stirring for 12 hours. After the reaction equilibrium, the mixture was poured into ethyl acetate and washed with saturated brine (1 × 40 mL). The combined organic layers were dried over anhydrous Na<sub>2</sub>SO<sub>4</sub>. The filtrate was concentrated in vacuo and purified by a silica gel packed flash chromatography column with petroleum ether/ethyl acetate

(15:1) as the eluent to afford the pyridazine product **3a**. It was found that no deuteration was detected on the C(sp<sup>2</sup>)-H bond of pyridazine aromatic ring.

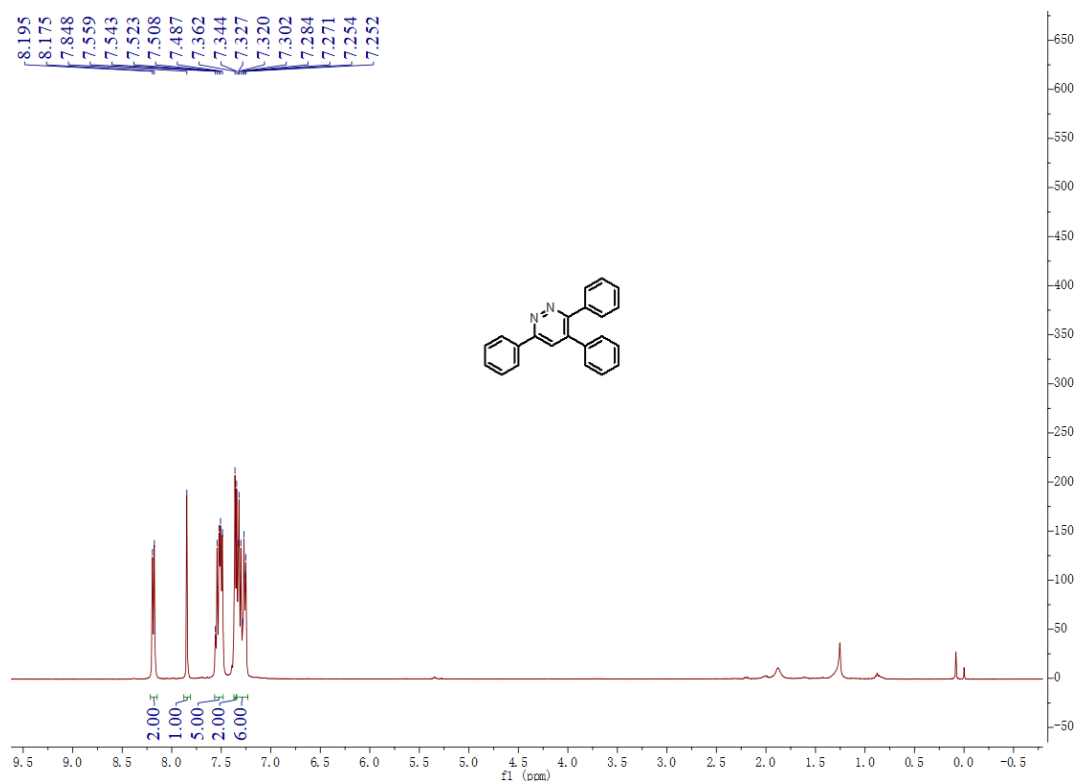

**Figure S2:** <sup>1</sup>H NMR spectrum of product **3a** with the treatment of D<sub>2</sub>O under standard conditions

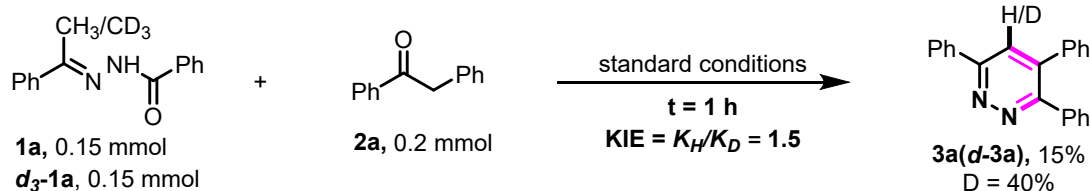

In a 25 mL Schlenk reaction tube with a stir bar, acylhydrazone (**1a**) (0.15 mmol, 35.7 mg), deuterated acylhydrazone (**d<sub>3</sub>-1a**)<sup>11</sup> (0.15 mmol, 36.2 mg), 2-phenylacetophenone (**2a**) (0.2 mmol, 39.2 mg), Cu(OAc)<sub>2</sub> (0.2 mmol, 36.2 mg), TEMPO (0.4 mmol, 62.4 mg), HOAc (0.32 mmol) were dissolved in MeCN (2 mL) under a nitrogen atmosphere. The reaction mixture was then heated at 100 °C (oil bath) with vigorous stirring for 1 hour. After the reaction equilibrium, the mixture was poured into ethyl acetate and washed with saturated brine (1 × 40 mL). The combined organic layers were dried over anhydrous Na<sub>2</sub>SO<sub>4</sub>. The filtrate was concentrated in vacuo and purified by a silica gel packed flash chromatography column with petroleum ether/ethyl acetate (15:1) as the eluent to afford the desired pyridazine product **3a(d-3a)** in a 15% yield. It was found that the value of competitive kinetic isotope effect of acylhydrazone equals 1.5,

suggesting the cleavage of C(sp<sup>3</sup>)-H bond on the acylhydrazone might not be the rate-determining step for the synthesis of 3,4,6-trisubstituted pyridazine.

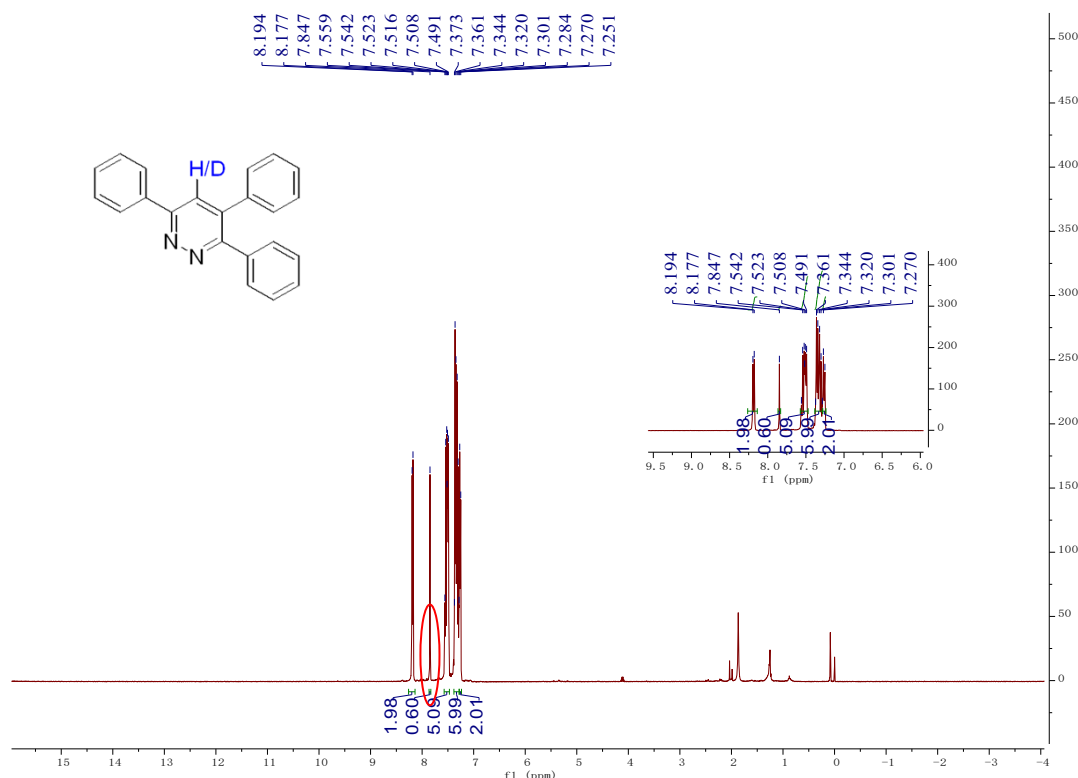

**Figure S3.** The <sup>1</sup>H NMR spectrum of pyridazine **3a**(*d*-**3a**) from the competitive kinetic isotope effect experiment

### 7.1.3. Control experiments.

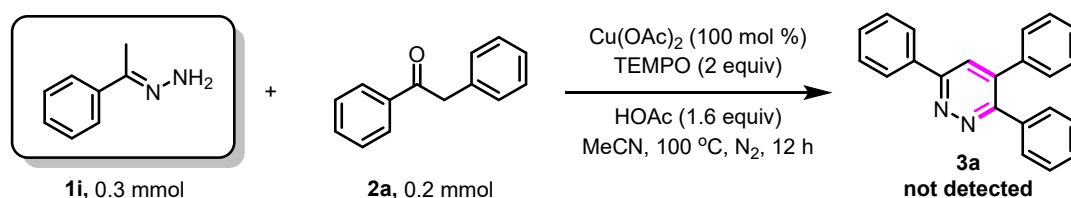

In a 25 mL Schlenk reaction tube with a stir bar, (*E*)-(1-phenylethylidene)hydrazine (**1i**) (0.3 mmol, 40.2 mg), 2-phenylacetophenone (**2a**) (0.2 mmol, 39.2 mg), Cu(OAc)<sub>2</sub> (0.2 mmol, 36.2 mg), TEMPO (0.4 mmol, 62.4 mg), HOAc (0.32 mmol, 1.6 equiv) were dissolved in MeCN (2 mL) under a nitrogen atmosphere. The reaction mixture was then heated at 100 °C (oil bath) with vigorous stirring for 12 hours. After the reaction completion, the mixture was monitored by TLC, and it was found that no desired pyridazine product **3a** was formed during the reaction course, revealing that (*E*)-(1-phenylethylidene)hydrazine was not the possible intermediate and benzoyl substituent was crucial for this [4+2] annulation reaction.

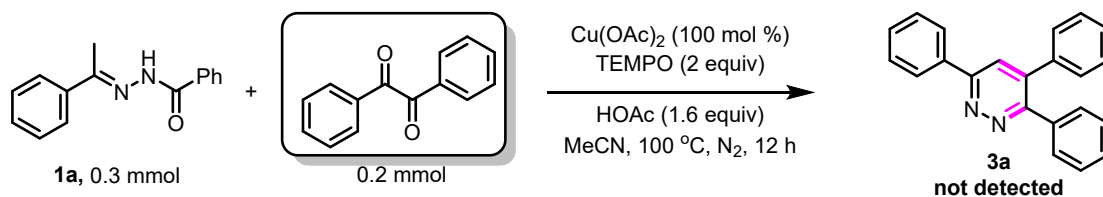

In a 25 mL Schlenk reaction tube with a stir bar, acylhydrazone (**1a**) (0.3 mmol, 71.4 mg), benzil (0.2 mmol, 39.2 mg),  $\text{Cu}(\text{OAc})_2$  (0.2 mmol, 36.2 mg), TEMPO (0.4 mmol, 62.4 mg), HOAc (0.32 mmol) were dissolved in MeCN (2 mL) under a nitrogen atmosphere. The reaction mixture was then heated at 100 °C (oil bath) with vigorous stirring for 12 hours. After the reaction completion, the mixture was monitored by TLC, and it was found that no desired pyridazine product **3a** was detected. These results indicated that benzil was not the key intermediate for the synthesis of pyridazine.

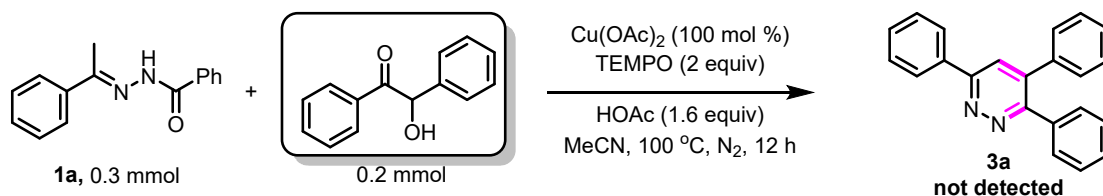

In a 25 mL Schlenk reaction tube with a stir bar, acylhydrazone (**1a**) (0.3 mmol, 71.4 mg), benzoin (0.2 mmol, 42.4 mg),  $\text{Cu}(\text{OAc})_2$  (0.2 mmol, 36.2 mg), TEMPO (0.4 mmol, 62.4 mg), HOAc (0.32 mmol) were dissolved in MeCN (2 mL) under a nitrogen atmosphere. The reaction mixture was then heated at 100 °C (oil bath) with vigorous stirring for 12 hours. After the reaction completion, the mixture was monitored by TLC, and it was found that no desired pyridazine product **3a** was detected. These results indicated that benzoin was not the key intermediate for the synthesis of pyridazine.

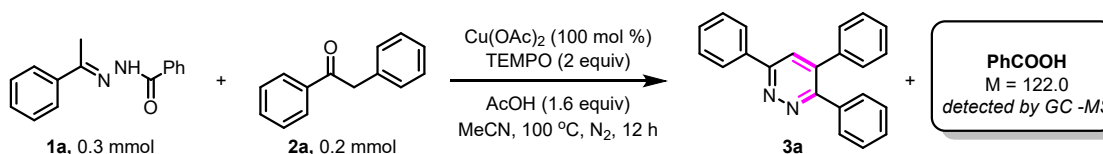

In a 25 mL Schlenk reaction tube with a stir bar, acylhydrazone (**1a**) (0.3 mmol, 71.4 mg), 2-phenylacetophenone (**2a**) (0.2 mmol, 39.2 mg),  $\text{Cu}(\text{OAc})_2$  (0.2 mmol, 36.2 mg), TEMPO (0.4 mmol, 62.4 mg), HOAc (0.32 mmol, 1.6 equiv) were dissolved in MeCN (2 mL) under a nitrogen atmosphere. The reaction mixture was then heated at 100 °C (oil bath) with vigorous stirring for 12 hours. After the reaction completion, the mixture was detected by GC-MS, and it was found that benzoic acid was formed during the

## reaction course.

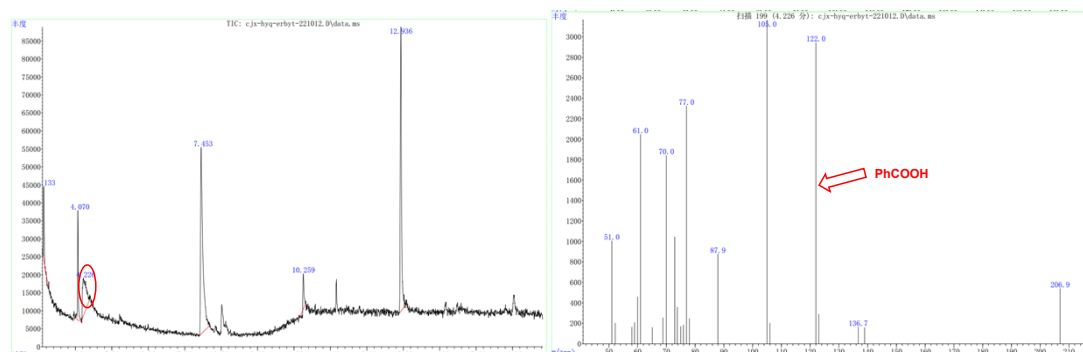

**Figure S4.** The detection of benzoic acid by GC-MS from the crude model reaction mixture

## 7.2. Mechanistic studies for the synthesis of 3,5-disubstituted pyridazines.

### 7.2.1. Competitive experiment.

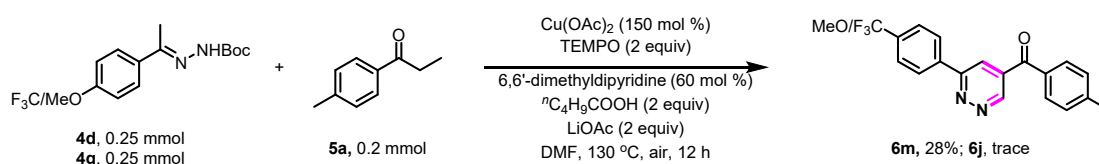

In a 25 mL Schlenk reaction tube with a stir bar, acylhydrazones (**4d**) (0.25 mmol, 66.0 mg) and (**4g**) (0.25 mmol, 75.5 mg), 4'-methylpropiophenone (**5a**) (0.2 mmol, 26.8 mg),  $\text{Cu}(\text{OAc})_2$  (0.3 mmol, 54.3 mg), 6,6'-dimethylpyridine (0.12 mmol, 22.0 mg), TEMPO (0.4 mmol, 62.4 mg), LiOAc (0.4 mmol, 25.6 mg),  $n\text{C}_4\text{H}_9\text{COOH}$  (0.4 mmol, 40.8 mg) were dissolved in DMF (2 mL) under air atmosphere. The reaction mixture was then heated at 130 °C (oil bath) with vigorous stirring for 12 hours. After the reaction equilibrium, the mixture was poured into ethyl acetate and was washed with saturated brine ( $3 \times 10$  mL). After the aqueous layer was extracted with ethyl acetate, the combined organic layers were dried over anhydrous  $\text{Na}_2\text{SO}_4$  and evaporated under vacuum. The residue was purified by a silica gel packed flash chromatography column with petroleum ether/ethyl acetate (12:1) as the eluent to afford the desired pyridazine products. The results revealed that pyridazine **6m** was isolated in a 28% yield, in contrast, only a trace amount of pyridazine **6j** was detected, which underlined that electron-deficient acylhydrazone facilitated this tandem annulation reaction better.

### 7.2.2. Radical-trapping experiment.

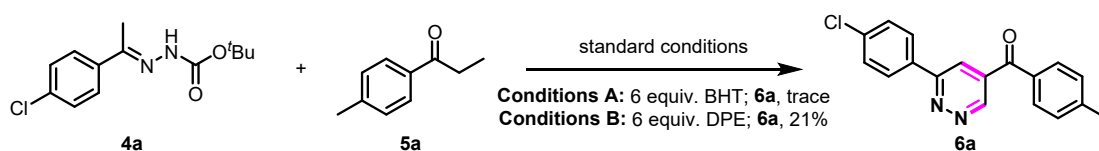

**Conditions A:** In a 25 mL Schlenk reaction tube with a stir bar, acylhydrazone (**4a**) (0.25 mmol, 67.0 mg), 4'-methylpropiophenone (**5a**) (0.2 mmol, 26.8 mg), Cu(OAc)<sub>2</sub> (0.3 mmol, 54.3 mg), TEMPO (0.4 mmol, 62.4 mg), 6,6-dimethylpyridine (0.12 mmol, 22.1 mg), LiOAc (0.4 mmol, 25.6 mg), <sup>n</sup>C<sub>4</sub>H<sub>9</sub>COOH (0.4 mmol, 40.8 mg), and radical-scavenger BHT (1.2 mmol, 264.3 mg) were dissolved in DMF (2 mL) under air atmosphere. The reaction mixture was then heated at 130 °C (oil bath) with vigorous stirring for 12 hours. After the reaction completion, the mixture was detected by TLC, and it was found that the desired pyridazine product **6a** was not detected, revealing that this transformation might involve radical process.

**Conditions B:** In a 25 mL Schlenk reaction tube with a stir bar, acylhydrazone (**4a**) (0.25 mmol, 67.0 mg), 4'-methylpropiophenone (**5a**) (0.2 mmol, 26.8 mg), Cu(OAc)<sub>2</sub> (0.3 mmol, 54.3 mg), TEMPO (0.4 mmol, 62.4 mg), 6,6-dimethylpyridine (0.12 mmol, 22.1 mg), LiOAc (0.4 mmol, 25.6 mg), <sup>n</sup>C<sub>4</sub>H<sub>9</sub>COOH (0.4 mmol, 40.8 mg) and radical-scavenger DPE (1.2 mmol, 216.3 mg) were dissolved in DMF (2 mL) under air atmosphere. The reaction mixture was then heated at 130 °C (oil bath) with vigorous stirring for 12 hours. After the reaction completion, the mixture was poured into ethyl acetate and washed with saturated brine (1 × 40 mL). The combined organic layers were dried over anhydrous Na<sub>2</sub>SO<sub>4</sub>. The filtrate was concentrated in vacuo and purified by a silica gel packed flash chromatography column with petroleum ether/ethyl acetate (12:1) as the eluent to afford the desired 3,5-disubstituted pyridazine product **6a**. The results indicated that the yield of targeted products **6a** was drastically decreased to 21%, revealing that radical process might be involved in this cascade annulation.

### 7.2.3. Control experiments.

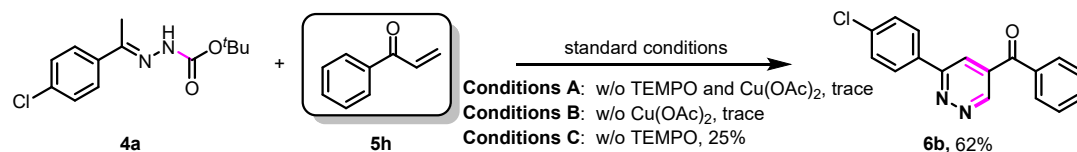

**Conditions A:** In a 25 mL Schlenk reaction tube with a stir bar, acylhydrazone (**4a**) (0.25

mmol, 67.0 mg), 1-phenyl-2-propen-1-one (**5h**) (0.2 mmol, 26.4 mg), 6,6-dimethylpyridine (0.12 mmol, 22.1 mg), LiOAc (0.4 mmol, 25.6 mg) and <sup>n</sup>C<sub>4</sub>H<sub>9</sub>COOH (0.4 mmol, 40.8 mg) were dissolved in DMF (2 mL) under air atmosphere. The reaction mixture was then heated at 130 °C (oil bath) with vigorous stirring for 12 hours. After the reaction completion, the mixture was monitored by TLC, and it was found that only trace of desired product **6b** was detected.

**Conditions B:** In a 25 mL Schlenk reaction tube with a stir bar, acylhydrazone (**4a**) (0.25 mmol, 67.0 mg), 1-phenyl-2-propen-1-one (**5h**) (0.2 mmol, 26.4 mg), TEMPO (0.4 mmol, 62.4 mg), 6,6-dimethylpyridine (0.12 mmol, 22.1 mg), LiOAc (0.4 mmol, 25.6 mg) and <sup>n</sup>C<sub>4</sub>H<sub>9</sub>COOH (0.4 mmol, 40.8 mg) were dissolved in DMF (2 mL) under air atmosphere. The reaction mixture was then heated at 130 °C (oil bath) with vigorous stirring for 12 hours. After the reaction completion, the mixture was monitored by TLC, and it was found that only trace of the desired product **6b** was detected.

**Conditions C:** In a 25 mL Schlenk reaction tube with a stir bar, acylhydrazone (**4a**) (0.25 mmol, 67.0 mg), 1-phenyl-2-propen-1-one (**5h**) (0.2 mmol, 26.4 mg), Cu(OAc)<sub>2</sub> (0.3 mmol, 54.3 mg), 6,6-dimethylpyridine (0.12 mmol, 22.1 mg), LiOAc (0.4 mmol, 25.6 mg) and <sup>n</sup>C<sub>4</sub>H<sub>9</sub>COOH (0.4 mmol, 40.8 mg) were dissolved in DMF (2 mL) under air atmosphere. The reaction mixture was then heated at 130 °C (oil bath) with vigorous stirring for 12 hours. After the reaction completion, the mixture was poured into ethyl acetate and was washed with saturated brine (3 × 10 mL). After the aqueous layer was extracted with ethyl acetate, the combined organic layers were dried over anhydrous Na<sub>2</sub>SO<sub>4</sub>. The filtrate was concentrated in vacuo and purified by a silica gel packed flash chromatography column with petroleum ether/ethyl acetate (12:1) as the eluent to afford the desired pyridazine product **6b** within a 25% yield.

The aforementioned results indicated that 1-phenyl-2-propen-1-one (**5h**) was the indeed intermediate formed from propiophenone, and the subsequent annulation of 1-phenyl-2-propen-1-one with acylhydrazone was promoted by Cu(OAc)<sub>2</sub> and TEMPO.



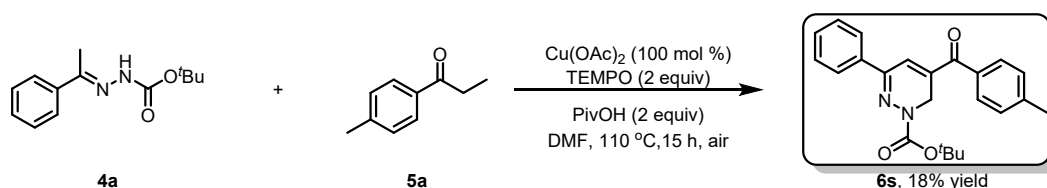

In a 25 mL Schlenk reaction tube with a stir bar, acylhydrazone (**4a**) (0.25 mmol), 1-(*p*-tolyl)propan-1-one (**5a**) (0.2 mmol),  $\text{Cu}(\text{OAc})_2$  (0.2 mmol, 36.2 mg), Tempo (0.4 mmol, 62.4 mg), PivOH (0.4 mmol, 40.8 mg) were dissolved in DMF (2 mL) under air atmosphere. The reaction mixture was then heated at 110 °C (oil bath) with vigorous stirring for 15 hours. After the reaction equilibrium, the mixture was poured into ethyl acetate, which was washed with saturated brine ( $3 \times 10$  mL). After the reaction equilibrium, the mixture was poured into ethyl acetate and washed with saturated brine ( $3 \times 10$  mL). The combined organic layers were dried over anhydrous  $\text{Na}_2\text{SO}_4$  and evaporated under vacuum. The residue was purified by a silica gel packed flash chromatography column with petroleum ether/ethyl acetate (12:1) as the eluent to afford the desired 1,6-dihydropyridazine motif (**6s**) in a 18% yield.

***tert*-butyl 5-(4-methylbenzoyl)-3-phenylpyridazine-1(6*H*)-carboxylate (**6s**):**

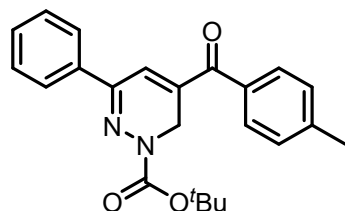

Yellow liquid. Column chromatography on silica gel (Eluent: petroleum ether/ethyl acetate, 12/1).  $^1\text{H}$  NMR (500 MHz,  $\text{CDCl}_3$ ) 7.74-7.73 (m, 2H), 7.68 (d,  $J = 7.0$  Hz, 2H), 7.37-7.36 (m, 3H), 7.30 (d,  $J = 7.5$  Hz, 2H), 6.94 (s, 1H), 4.66 (s, 2H), 2.43 (s, 3H), 1.60 (s, 9H).  $^{13}\text{C}$  NMR (125 MHz,  $\text{CDCl}_3$ )  $\delta$  193.6, 135.0, 134.9, 133.9, 130.0, 129.4, 129.3, 128.9, 128.1, 126.2, 126.0, 125.0, 82.7, 40.9, 38.5, 21.7. HRMS (ESI-TOF)  $m/z$ :  $[\text{M} + \text{H}]^+$  Calcd for  $\text{C}_{23}\text{H}_{25}\text{N}_2\text{O}_3$  377.1860, Found 377.1871.

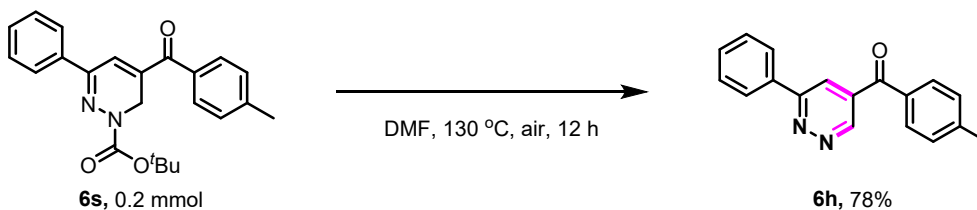

In a 25 mL Schlenk reaction tube with a stir bar, 1,6-dihydropyridazine (**6s**) (0.2 mmol, 75.2 mg) were dissolved in DMF (2 mL) under air atmosphere. The reaction mixture was then heated at 130 °C (oil bath) with vigorous stirring for 12 hours. After the reaction equilibrium, the mixture was poured into ethyl acetate and was washed with saturated brine (3 × 10 mL). After the aqueous layer was extracted with ethyl acetate, the combined organic layers were dried over anhydrous Na<sub>2</sub>SO<sub>4</sub>. The filtrate was concentrated in vacuo and purified by a silica gel packed flash chromatography column with petroleum ether/ethyl acetate (12:1) as the eluent to afford the desired pyridazine product **6h** smoothly within a 78% yield. These results streamlined that 1,6-dihydropyridazine was the key intermediate of this reaction, and it could be transformed into the targeted pyridazine **6h** just in DMF solution without any Cu(OAc)<sub>2</sub> and TEMPO.

#### 7.2.4. Deuterium labeling experiments.

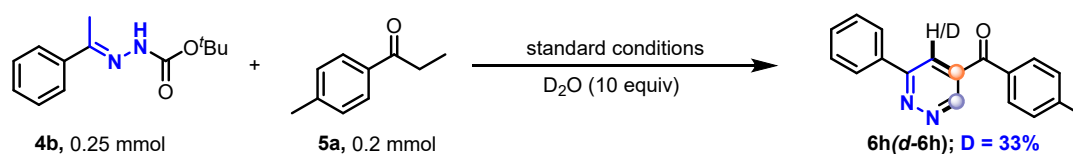

In a 25 mL Schlenk reaction tube with a stir bar, acylhydrazone (**4b**) (0.25 mmol, 58.5 mg), 4'-methylpropiophenone (**5a**) (0.2 mmol, 26.8 mg), Cu(OAc)<sub>2</sub> (0.3 mmol, 54.3 mg), TEMPO (0.4 mmol, 62.4 mg), 6,6-dimethyl-2,2'-dipyridine (0.12 mmol, 22.1 mg), LiOAc (0.4 mmol, 25.6 mg), <sup>13</sup>C<sub>4</sub>H<sub>9</sub>COOH (0.4 mmol, 40.8 mg) and D<sub>2</sub>O (2 mmol, 40 mg) were dissolved in DMF (2 mL) under air atmosphere. The reaction mixture was then heated at 130 °C (oil bath) with vigorous stirring for 12 hours. After the reaction completion, the mixture was poured into ethyl acetate and washed with saturated brine (1 × 10 mL). The combined organic layers were dried over anhydrous Na<sub>2</sub>SO<sub>4</sub>. The filtrate was concentrated in vacuo and purified by a silica gel packed flash chromatography column with petroleum ether/ethyl acetate (12:1) as the eluent to afford the desired 3,5-disubstituted pyridazine product **6h(d-6h)**. It was found that a 33% deuteration was detected on the C-H bond of pyridazine skeleton, revealing that the C-H bond cleavage of the methyl group on the acylhydrazone might be the reversible process.

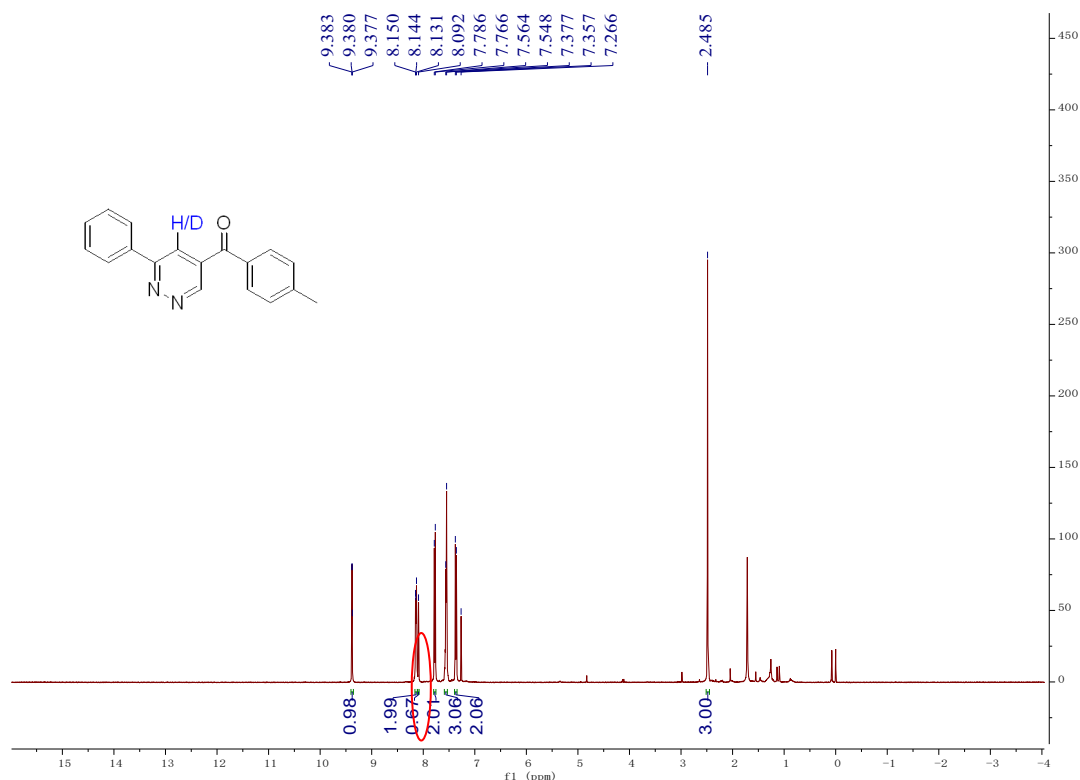

**Figure S5.** The  $^1\text{H}$  NMR spectrum of 3,5-disubstituted pyridazine **6h**(*d*-**6h**) from the model reaction treated by  $\text{D}_2\text{O}$

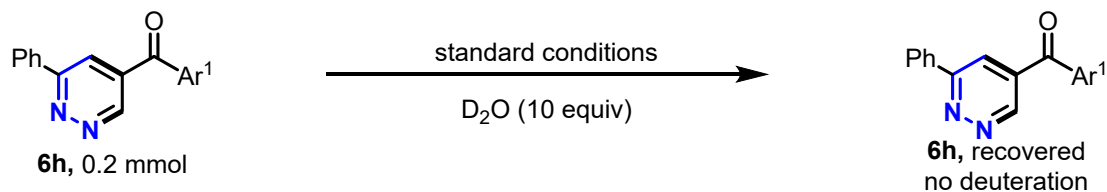

In a 25 mL Schlenk reaction tube with a stir bar, pyridazine product (**6h**) (0.2 mmol, 26.8 mg),  $\text{Cu}(\text{OAc})_2$  (0.3 mmol, 54.3 mg), TEMPO (0.4 mmol, 62.4 mg), 6,6-dimethyl-2,2'-dipyridine (0.12 mmol, 22.1 mg),  $\text{LiOAc}$  (0.4 mmol, 25.6 mg),  $^n\text{C}_4\text{H}_9\text{COOH}$  (0.4 mmol, 40.8 mg) and  $\text{D}_2\text{O}$  (2 mmol, 40 mg) were dissolved in DMF (2 mL) under air atmosphere. The reaction mixture was then heated at 130 °C (oil bath) with vigorous stirring for 12 hours. After the reaction completion, the mixture was poured into ethyl acetate and washed with saturated brine ( $1 \times 10$  mL). The combined organic layers were dried over anhydrous  $\text{Na}_2\text{SO}_4$ . The filtrate was concentrated in vacuo and purified by a silica gel packed flash chromatography column with petroleum ether/ethyl acetate (12:1) as the eluent to afford the desired 3,5-disubstituted pyridazine product **6h**. It was found that no deuteration was detected on the C-H bond of pyridazine skeleton.

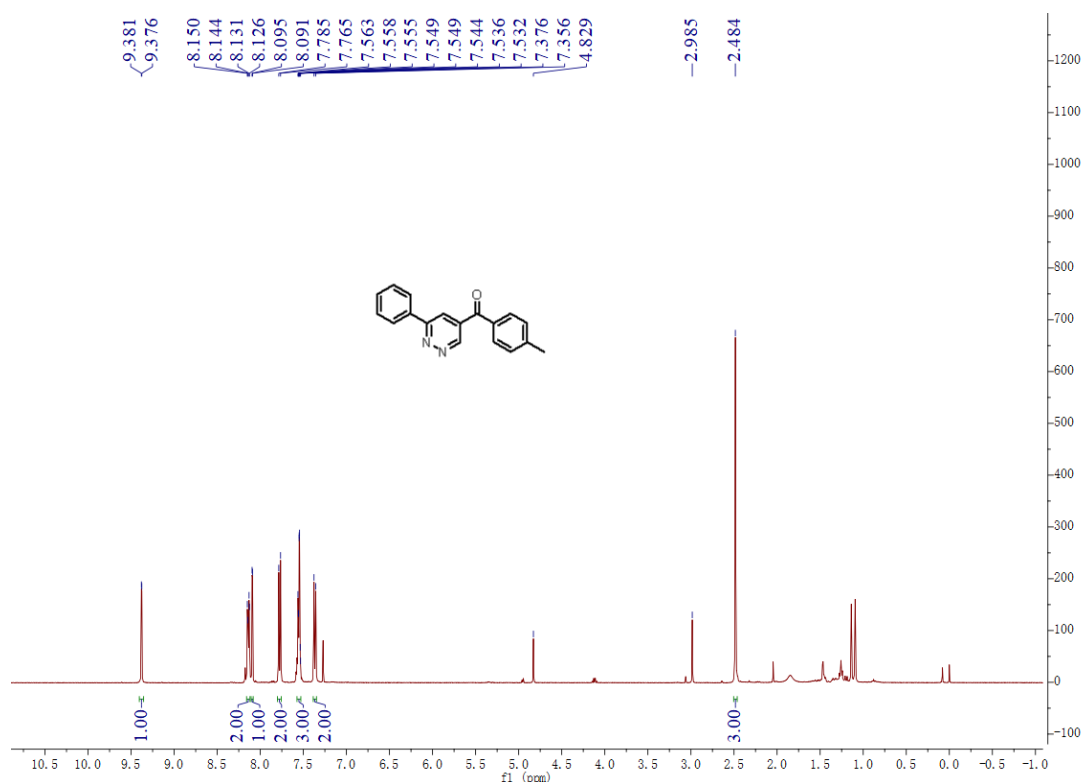

**Figure S6:**  $^1\text{H}$  NMR spectrum of product **6h** with the treatment of  $\text{D}_2\text{O}$  under standard conditions

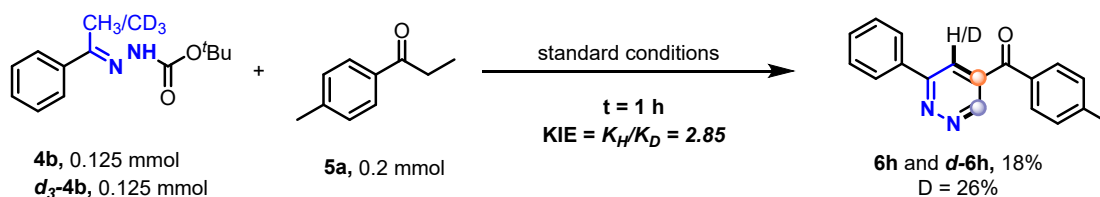

In a 25 mL Schlenk reaction tube with a stir bar, acylhydrazone (**4b**) (0.125 mmol, 29.25 mg), deuterated acylhydrazone ( $d_3$ -**4b**)<sup>11</sup> (0.125 mmol, 29.63 mg), 4'-methylpropiophenone (**5a**) (0.2 mmol, 26.8 mg),  $\text{Cu}(\text{OAc})_2$  (0.3 mmol, 54.3 mg), TEMPO (0.4 mmol, 62.4 mg), 6,6-dimethyl-2,2'-dipyridine (0.12 mmol, 22.1 mg),  $\text{LiOAc}$  (0.4 mmol, 25.6 mg), and  ${}^n\text{C}_4\text{H}_9\text{COOH}$  (0.4 mmol, 40.8 mg) were dissolved in DMF (2 mL) under air atmosphere. The reaction mixture was then heated at 130 °C (oil bath) with vigorous stirring for 1 hour. After the reaction completion, the mixture was poured into ethyl acetate and washed with saturated brine (1 × 40 mL). The combined organic layers were dried over anhydrous  $\text{Na}_2\text{SO}_4$ . The filtrate was concentrated in vacuo and purified by a silica gel packed flash chromatography column with petroleum ether/ethyl acetate (12:1) as the eluent to afford the desired 3,5-disubstituted pyridazine product **6h** and  $d$ -**6h**. It was found that the value of competitive kinetic isotope effect

equals **2.85**, which suggesting the aliphatic C-H bond cleavage of methyl on the acylhydrazone might be the rate-determining step for the synthesis of 3,5-disubstituted pyridazine.

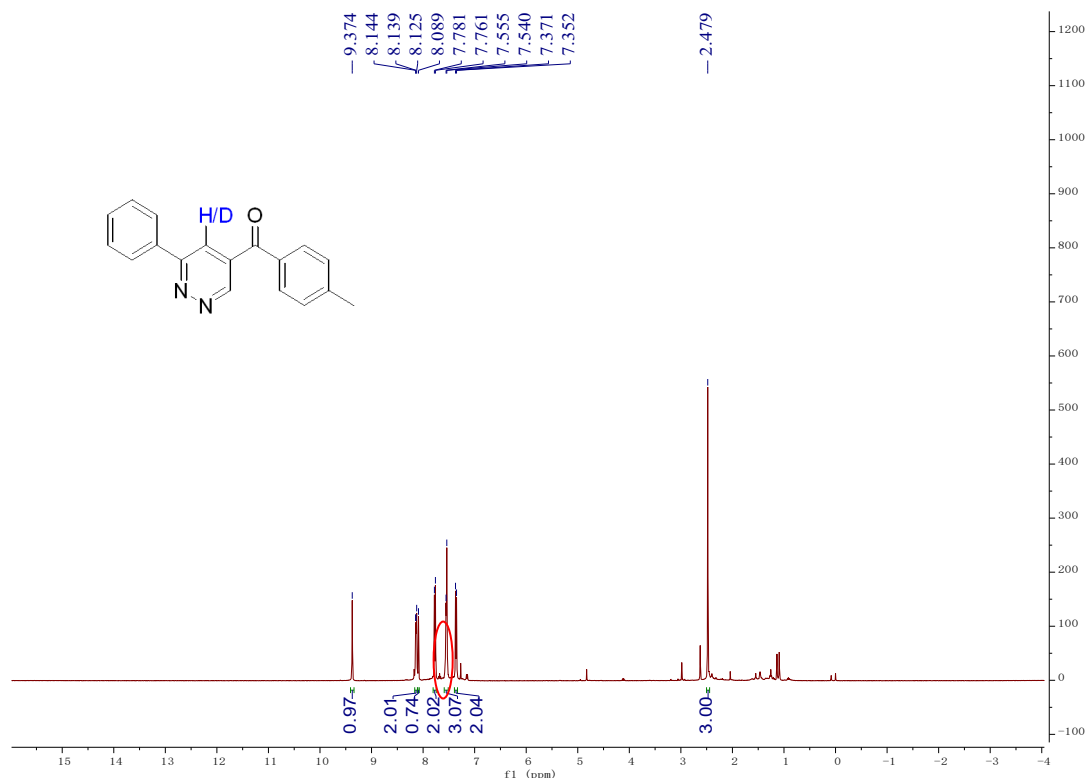

**Figure S7.** The <sup>1</sup>H NMR spectrum of **6h(d-6h)** from the competitive kinetic isotope experiment

### 7.2.5. XRD Detection of Cu(0) species from the crude model reaction to 3,5-disubstituted pyridazine.

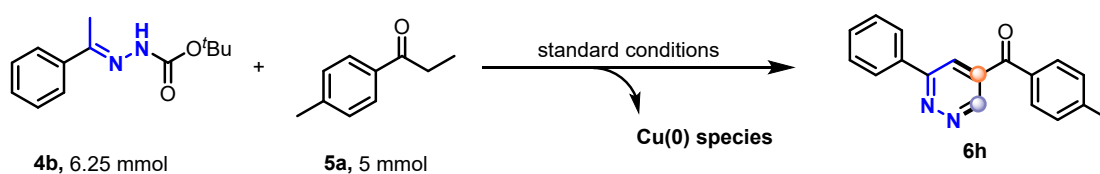

In a 100 mL round-bottom flask with a stir bar, acylhydrazone (**4b**) (6.25 mmol, 1.462 g), 4'-methylpropiophenone (**5a**) (5 mmol, 670 mg), Cu(OAc)<sub>2</sub> (7.5 mmol, 1.357 g), TEMPO (10 mmol, 1.56 g), 6,6-dimethyl-2,2'-dipyridine (3 mmol, 552.5 mg), LiOAc (10 mmol, 640 mg), and <sup>n</sup>C<sub>4</sub>H<sub>9</sub>COOH (10 mmol, 1020 mg) were dissolved in DMF (50 mL) under air atmosphere. The reaction mixture was then heated at 130 °C (oil bath) with vigorous stirring for 12 hours. After the reaction completion, the mixture was filtered directly, and residue was detected by XRD. It was found that Cu(0) species was

generated during the reaction course.

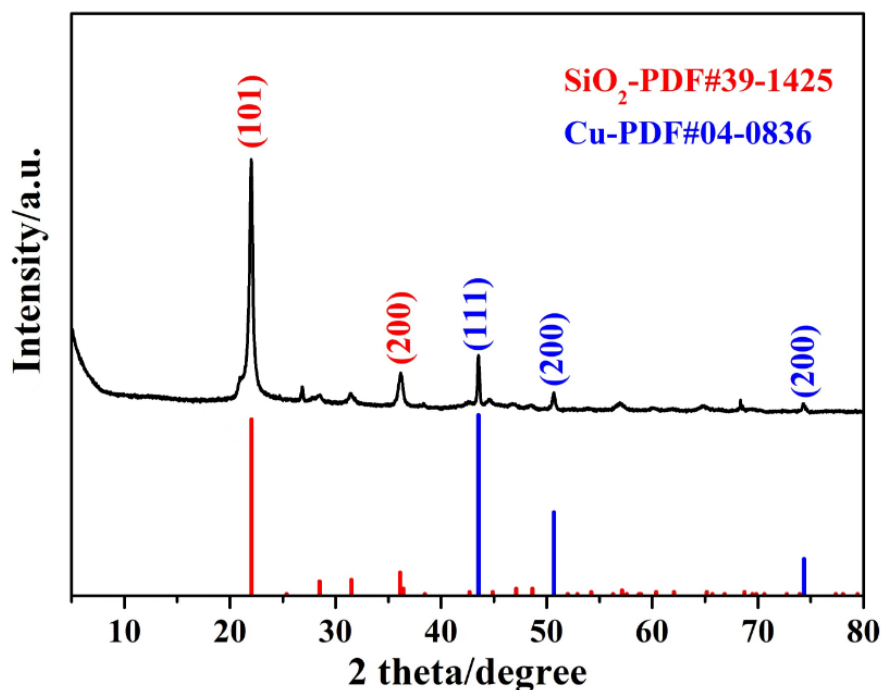

Figure S8. PXRD pattern of the scaled-up model reaction mixture for the synthesis of 3,5-disubstituted pyridazine

### 7.3. Probable mechanisms for the synthesis of polysubstituted pyridazines.

#### 7.3.1 The possible pathways for the synthesis of 3,4,6-trisubstituted pyridazines.

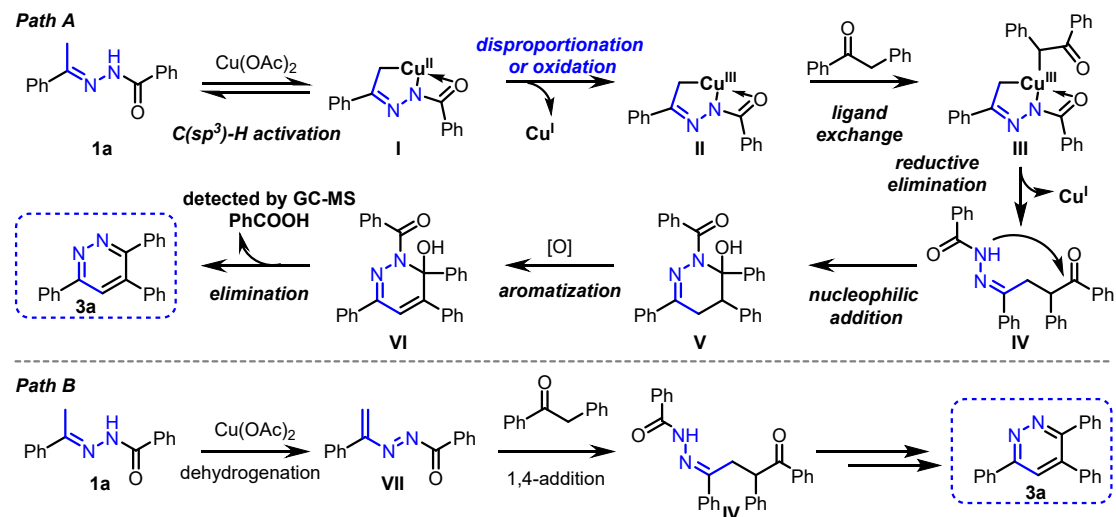

#### 7.3.2 The possible pathways for the synthesis of 3,5-disubstituted pyridazines.

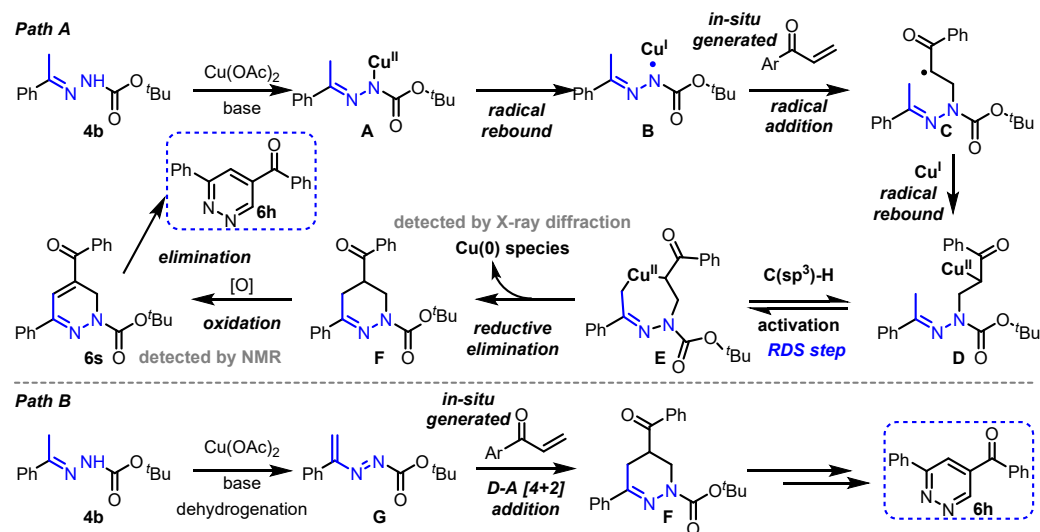

## 8. References.

- [1] G. Vantomme, S. Jiang and J.-M. Lehn, *J. Am. Chem. Soc.*, 2014, **136**, 9509–9518.
- [2] X. Wang, X. Wang, M. Liu, J. Ding, J. Chen and H. Wu, *Synthesis.*, 2013, **45**, 2241–2244.
- [3] C.-M. Chan, Z. Zhou and W.-Y. Yu, *Adv. Synth. Catal.*, 2016, **358**, 4067–4074.
- [4] O. S. Morozov, P. S. Gribov, A. F. Asachenko, P. V. Dorovatovskii, V. N. Khrustalev, V. B. Rybakov and M. S. Nechaev, *Adv. Synth. Catal.*, 2016, **358**, 1463–1468.
- [5] P. Nun, C. Martin, J. Martinez and F. Lamaty, *Tetrahedron.*, 2011, **67**, 8187–8194.
- [6] J. Wang, S. Zha, K. Chen and J. Zhu, *Org. Chem. Front.*, 2016, **3**, 1281–1285.
- [7] G. Li, L. Zhao, Y. Luo, Y. Peng, K. Xu, X. Huo and W. Zhang, *Chem. Eur. J.*, 2022, **28**, e202200273.
- [8] T. Kleine, R. Fröhlich, B. Wibbeling and E.-U. Würthwein, *J. Org. Chem.*, 2011, **76**, 4591–4599.
- [9] L. Dai, S. Yu, N. Lv, X. Ye, Y. Shao, Z. Chen and J. Chen, *Org. Lett.*, 2021, **23**, 5664–5668.
- [10] X. Zhang, X. Xue and Z. Gu, *Org. Lett.*, 2023, **25**, 3602–3606.
- [11] S. Kopf, F. Ye, H. Neumann and M. Beller, *Chem. Eur. J.*, 2021, **27**, 9768–9773.

## 9. X-Ray Crystallographic Data for Product 3n.

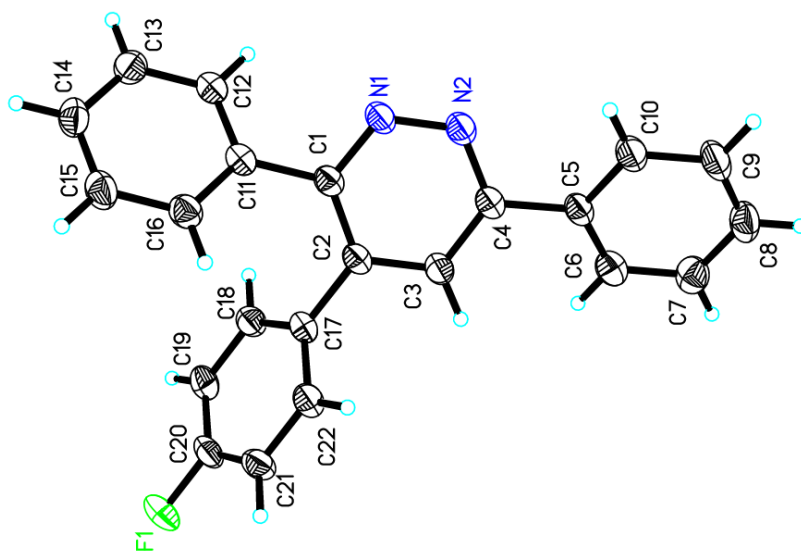

**Figure S9.** X-ray crystal structure of product **3n** with 30% ellipsoid probability

**X-ray structure determination.** Single crystals suitable for X-ray diffraction were obtained by slow evaporation of the solvent from a deuterated chloroform solution of product **3n** (CCDC 2227388) within several days under aerobic conditions. Crystal data collection and refinement parameters of **3n** are summarized below. X-ray diffraction data for **3n** was collected on a SMART APEX CCD diffractometer (graphite-monochromated MoK $\alpha$  radiation,  $\phi$ - $\omega$  scan technique,  $\lambda = 0.71073 \text{ \AA}$ ). The intensity data were integrated by means of the SAINT program. SADABS was used to perform area-detector scaling and absorption corrections. The structure was solved by direct methods and was refined against F 2 using all reflections with the aid of the SHELXTL package. All non-hydrogen atoms were found from the difference Fourier syntheses and refined anisotropically. The H atoms were included in calculated positions with isotropic thermal parameters related to those of the supporting carbon



atoms but were not included in the refinement. All calculations were performed using the Bruker Smart program.

Crystal data and structure refinement for product **3n**.

|                                   |                                                  |                   |
|-----------------------------------|--------------------------------------------------|-------------------|
| Identification code               | product <b>3n</b>                                |                   |
| Empirical formula                 | C <sub>22</sub> H <sub>15</sub> F N <sub>2</sub> |                   |
| Formula weight                    | 326.36                                           |                   |
| Temperature                       | 213(2) K                                         |                   |
| Wavelength                        | 0.71073 Å                                        |                   |
| Crystal system                    | Triclinic                                        |                   |
| Space group                       | P -1                                             |                   |
| Unit cell dimensions              | a = 8.757(4) Å                                   | a = 103.314(11)°. |
|                                   | b = 9.973(4) Å                                   | b = 100.861(12)°. |
|                                   | c = 11.506(4) Å                                  | g = 113.664(11)°. |
| Volume                            | 850.1(6) Å <sup>3</sup>                          |                   |
| Z                                 | 2                                                |                   |
| Density (calculated)              | 1.275 Mg/m <sup>3</sup>                          |                   |
| Absorption coefficient            | 0.083 mm <sup>-1</sup>                           |                   |
| F(000)                            | 340                                              |                   |
| Crystal size                      | 0.200 x 0.150 x 0.120 mm <sup>3</sup>            |                   |
| Theta range for data collection   | 2.371 to 25.496°.                                |                   |
| Index ranges                      | -10<=h<=10, -12<=k<=12, -13<=l<=13               |                   |
| Reflections collected             | 11393                                            |                   |
| Independent reflections           | 3083 [R(int) = 0.0694]                           |                   |
| Completeness to theta = 25.242°   | 97.8 %                                           |                   |
| Absorption correction             | Semi-empirical from equivalents                  |                   |
| Max. and min. transmission        | 0.7456 and 0.5125                                |                   |
| Refinement method                 | Full-matrix least-squares on F <sup>2</sup>      |                   |
| Data / restraints / parameters    | 3083 / 0 / 227                                   |                   |
| Goodness-of-fit on F <sup>2</sup> | 1.055                                            |                   |
| Final R indices [I>2sigma(I)]     | R1 = 0.0673, wR2 = 0.1716                        |                   |
| R indices (all data)              | R1 = 0.0952, wR2 = 0.1990                        |                   |
| Extinction coefficient            | 0.062(12)                                        |                   |
| Largest diff. peak and hole       | 0.282 and -0.247 e.Å <sup>-3</sup>               |                   |

## 10. NMR Spectra for All Products.

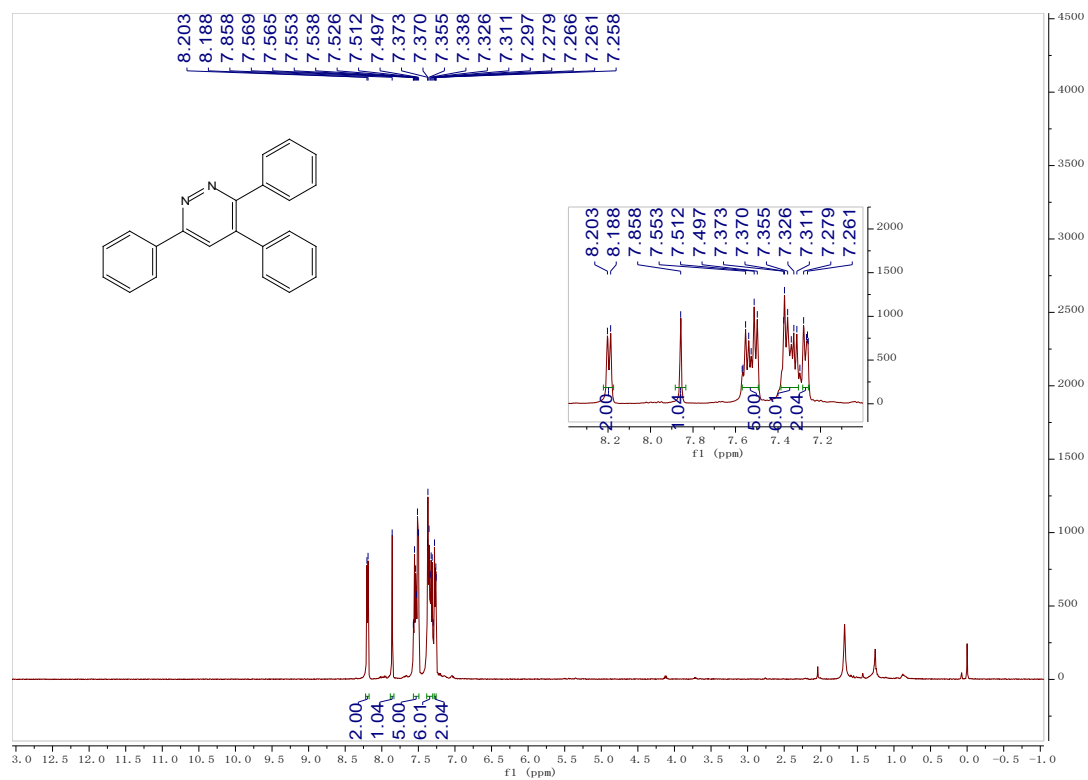

Figure S10.  $^1\text{H}$  NMR (500 MHz,  $\text{CDCl}_3$ ) of compound 3a

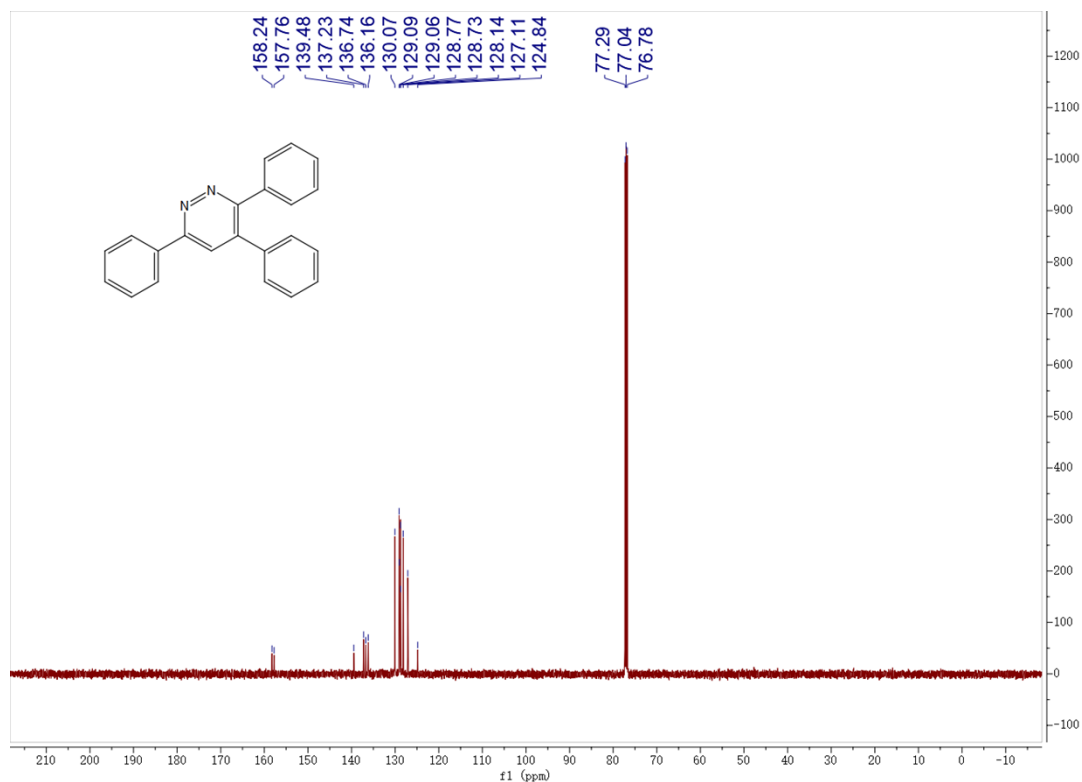

Figure S11. <sup>13</sup>C NMR (125 MHz, CDCl<sub>3</sub>) of compound 3a

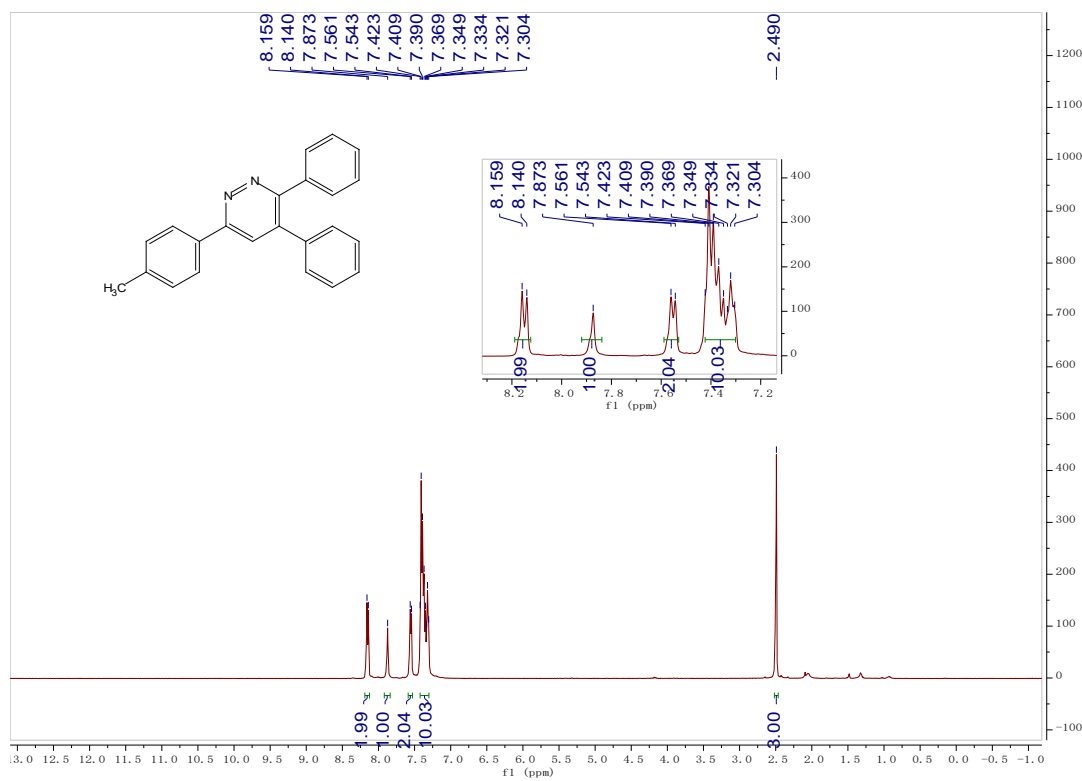

Figure S12. <sup>1</sup>H NMR (400 MHz, CDCl<sub>3</sub>) of compound 3b

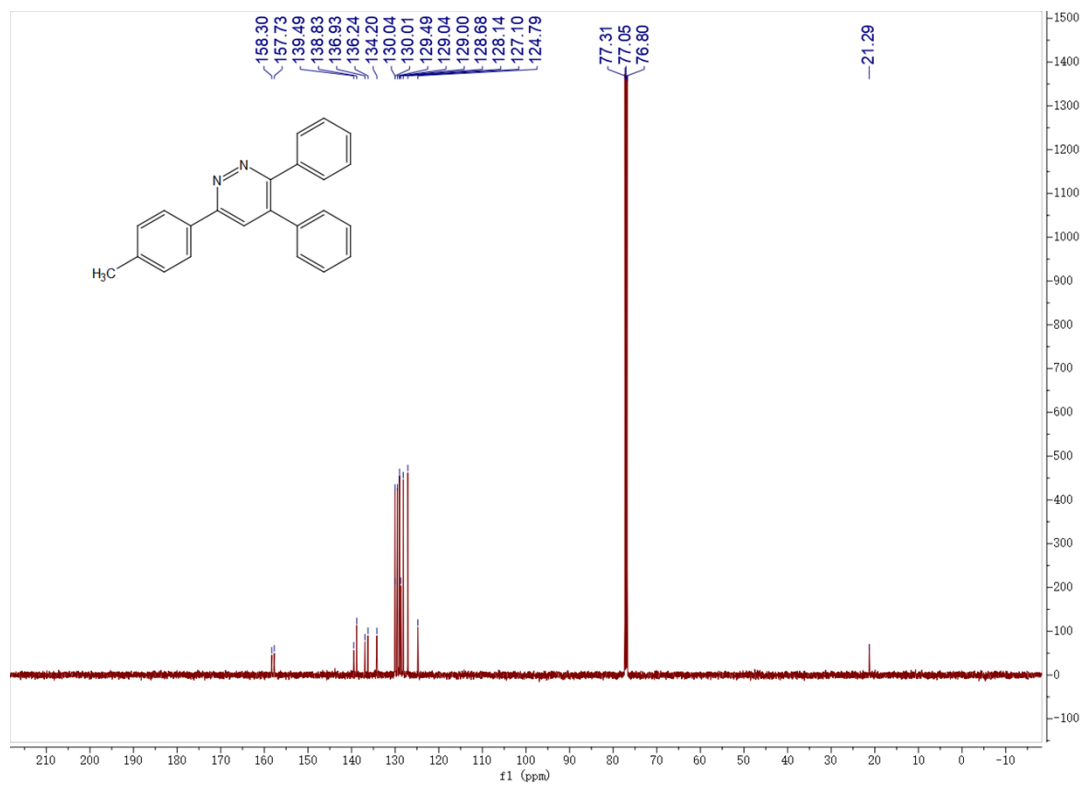

Figure S13. <sup>13</sup>C NMR (125 MHz, CDCl<sub>3</sub>) of compound 3b

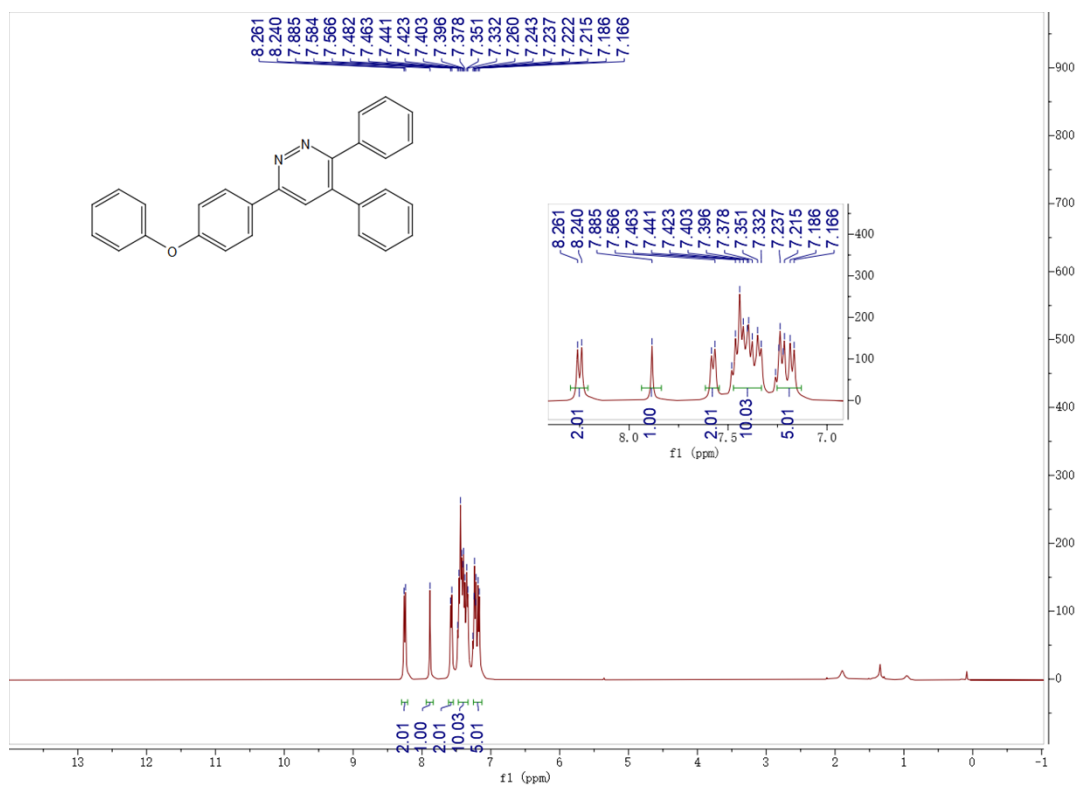

Figure S14. <sup>1</sup>H NMR (400 MHz, CDCl<sub>3</sub>) of compound 3c

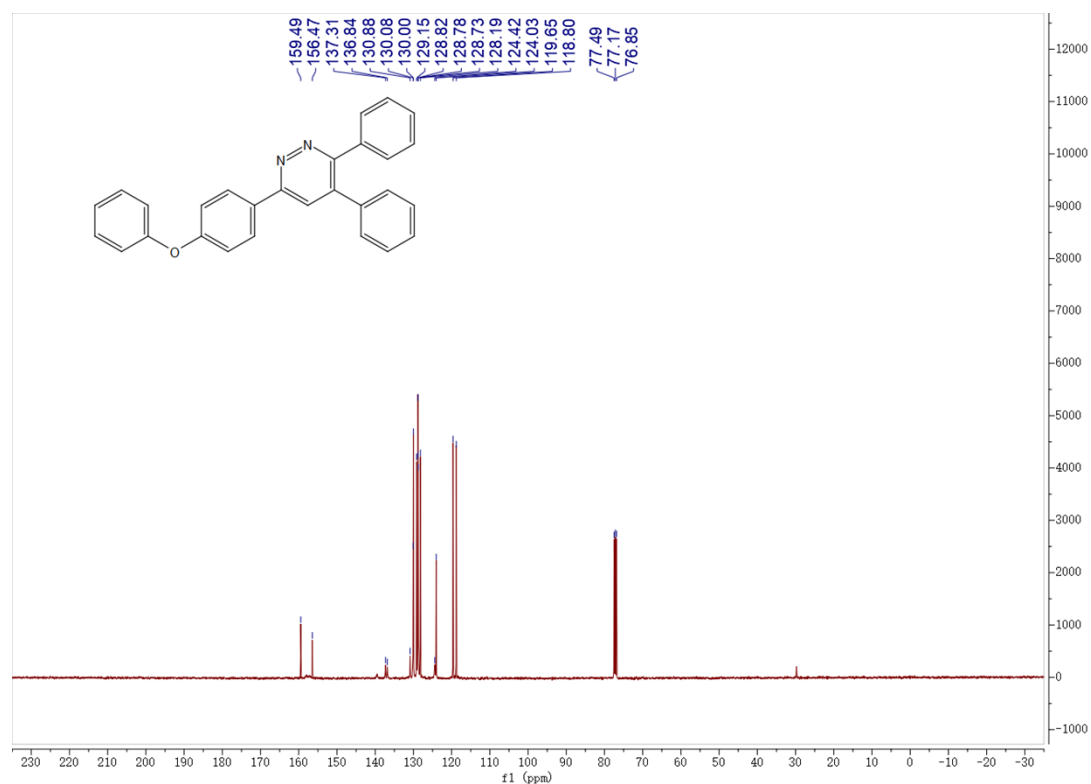

Figure S15.  $^{13}\text{C}$  NMR (100 MHz,  $\text{CDCl}_3$ ) of compound 3c

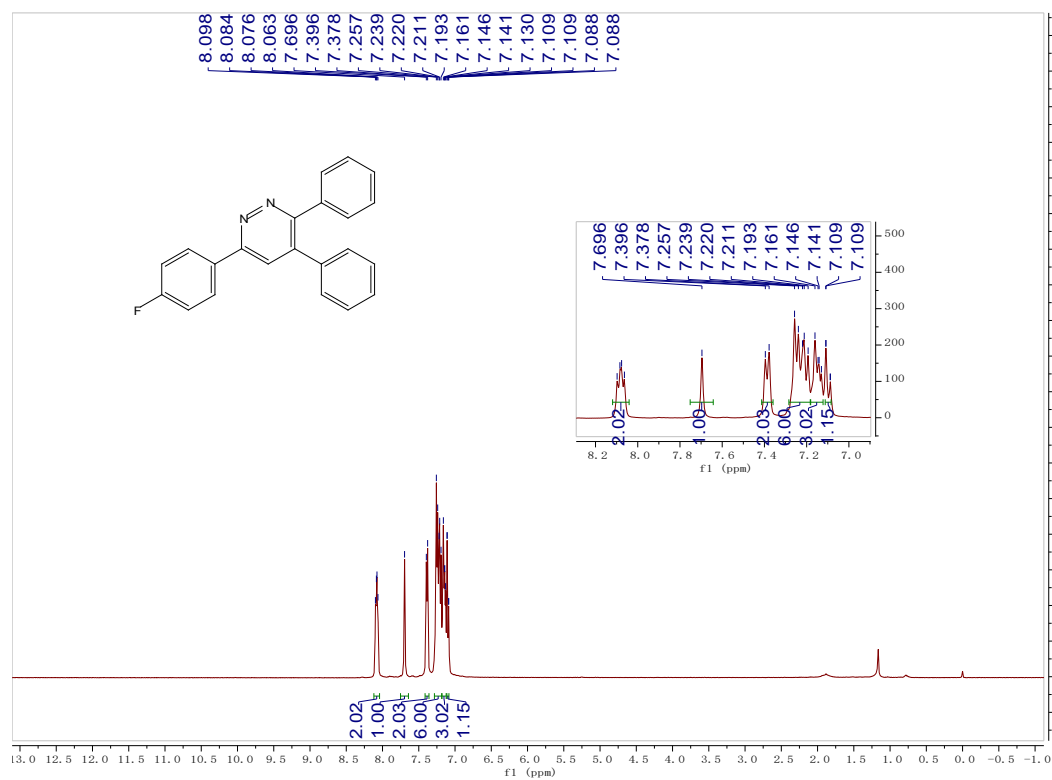

Figure S16.  $^1\text{H}$  NMR (400 MHz,  $\text{CDCl}_3$ ) of compound 3d

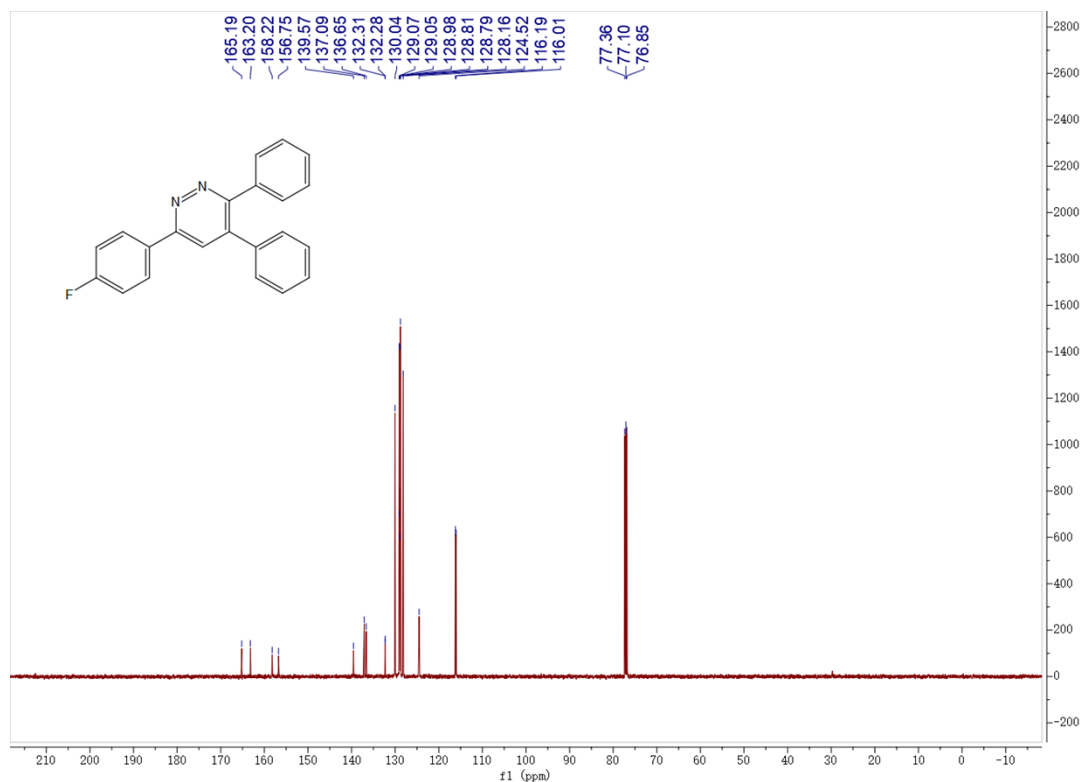

Figure S17. <sup>13</sup>C NMR (125 MHz, CDCl<sub>3</sub>) of compound 3d

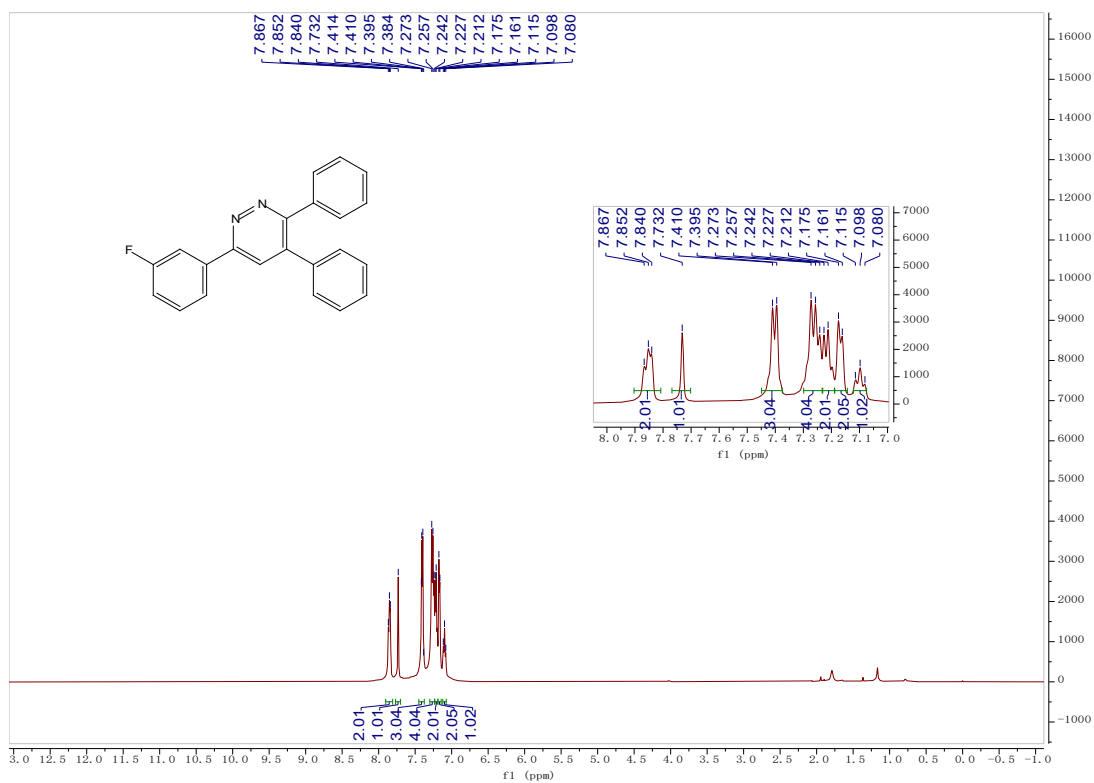

Figure S18. <sup>1</sup>H NMR (500 MHz, CDCl<sub>3</sub>) of compound 3e

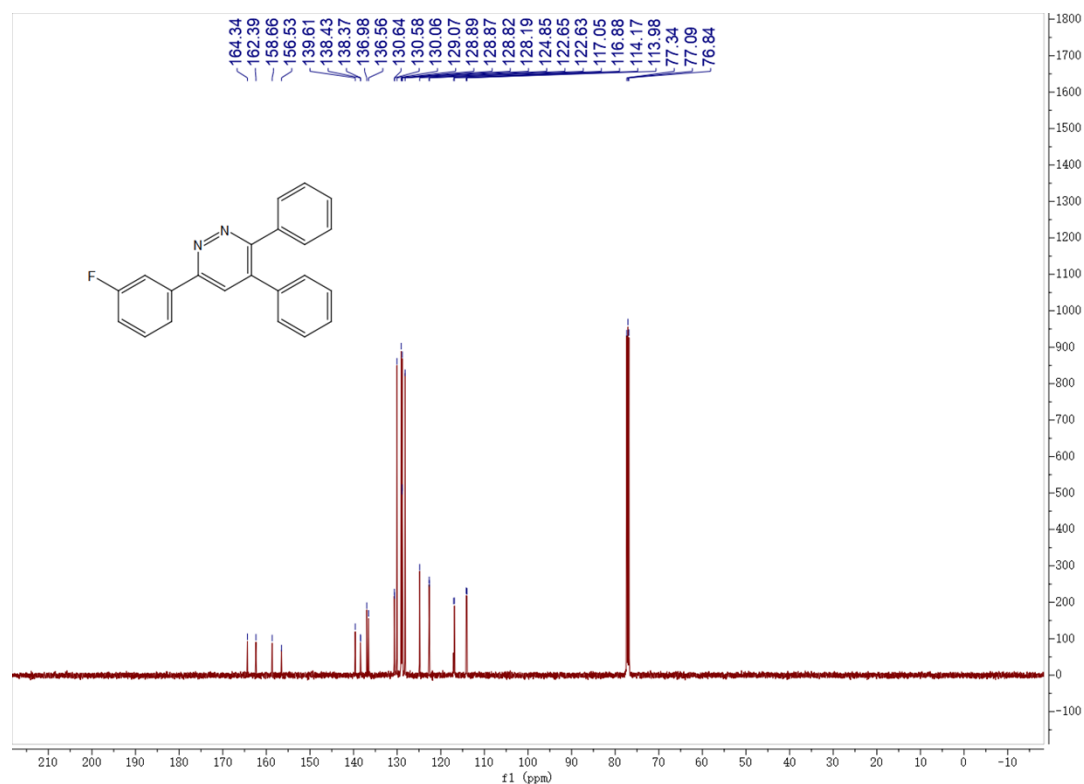

Figure S19. <sup>13</sup>C NMR (125 MHz, CDCl<sub>3</sub>) of compound 3e

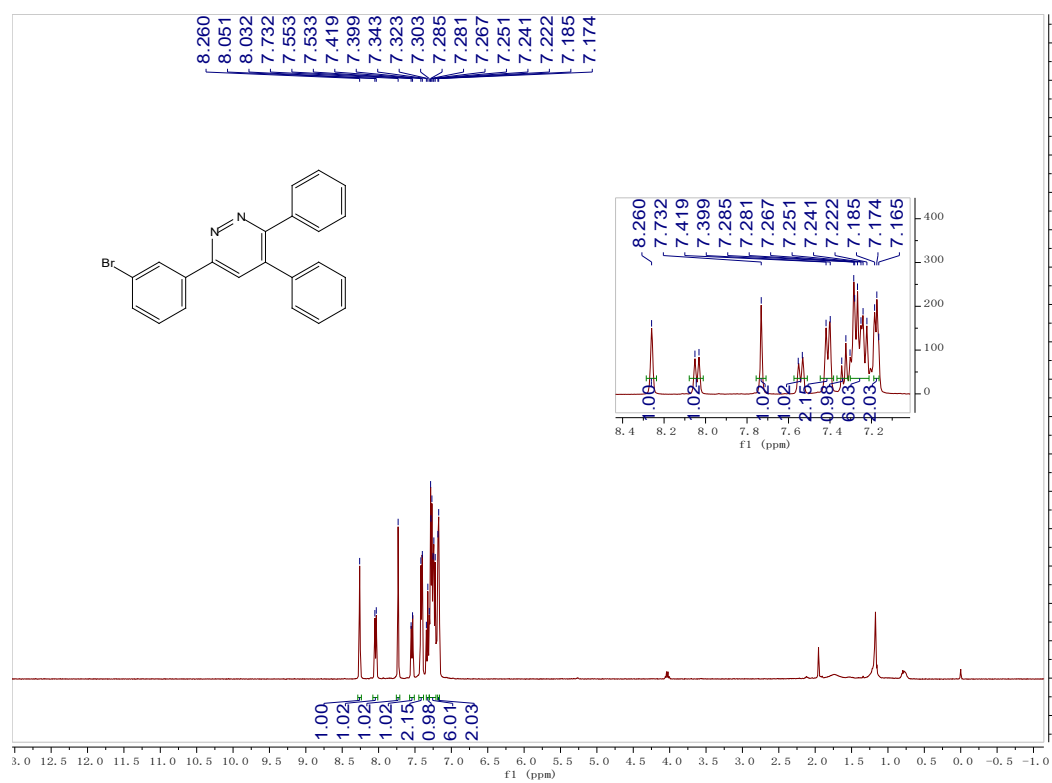

Figure S20. <sup>1</sup>H NMR (400 MHz, CDCl<sub>3</sub>) of compound 3f

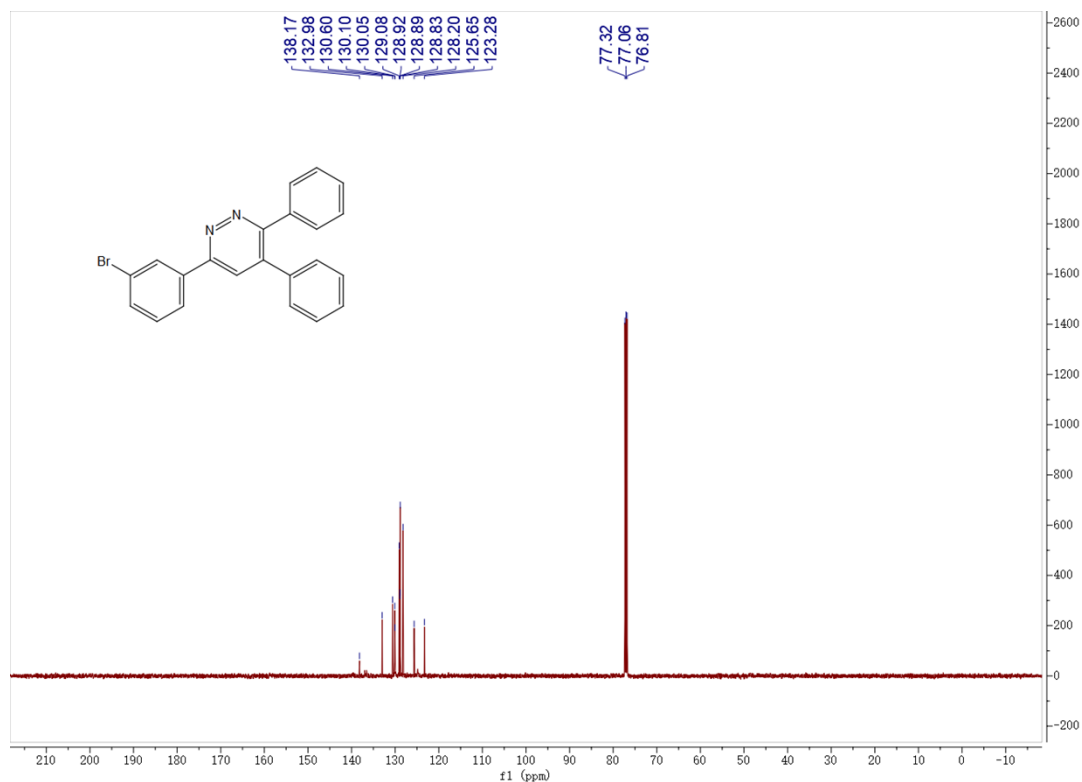

Figure S21. <sup>13</sup>C NMR (125 MHz, CDCl<sub>3</sub>) of compound 3f

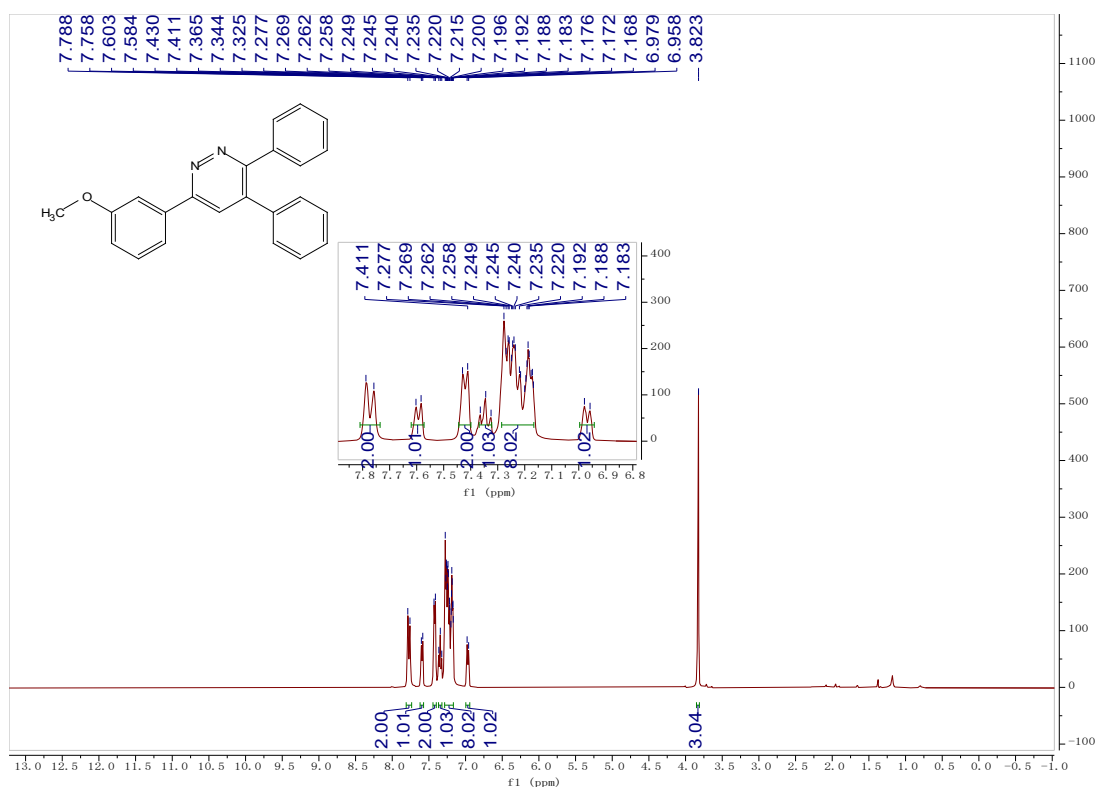

Figure S22. <sup>1</sup>H NMR (400 MHz, CDCl<sub>3</sub>) of compound 3g



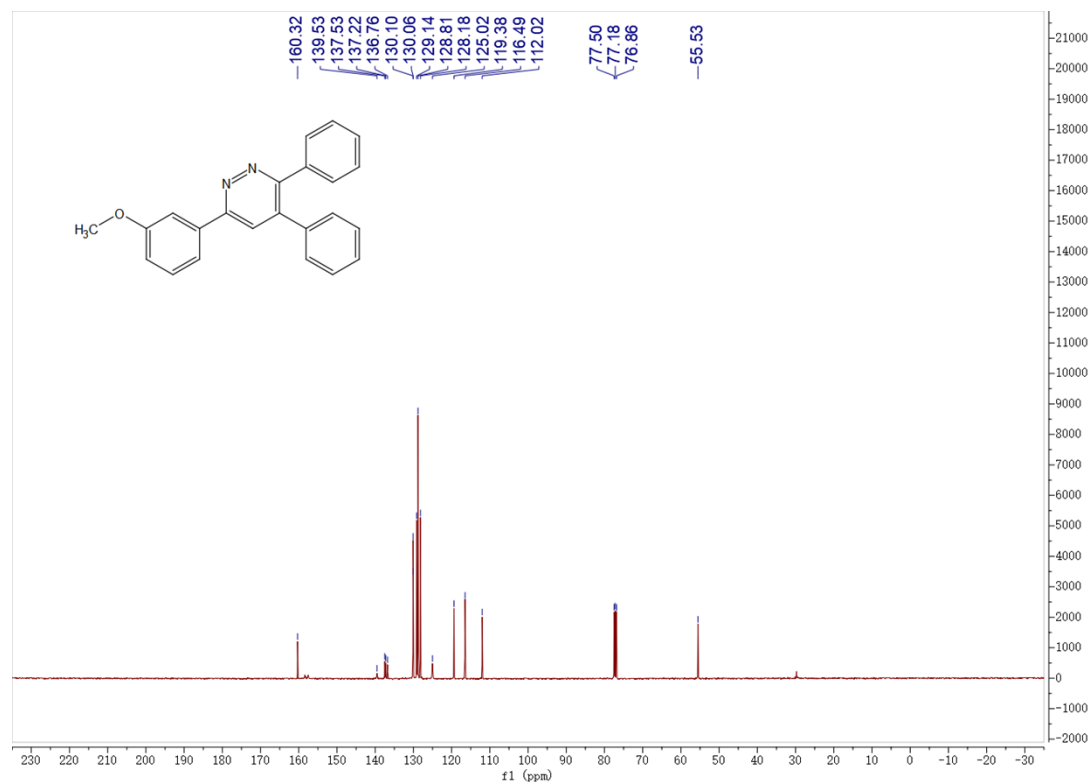

Figure S23.  $^{13}\text{C}$  NMR (100 MHz,  $\text{CDCl}_3$ ) of compound **3g**

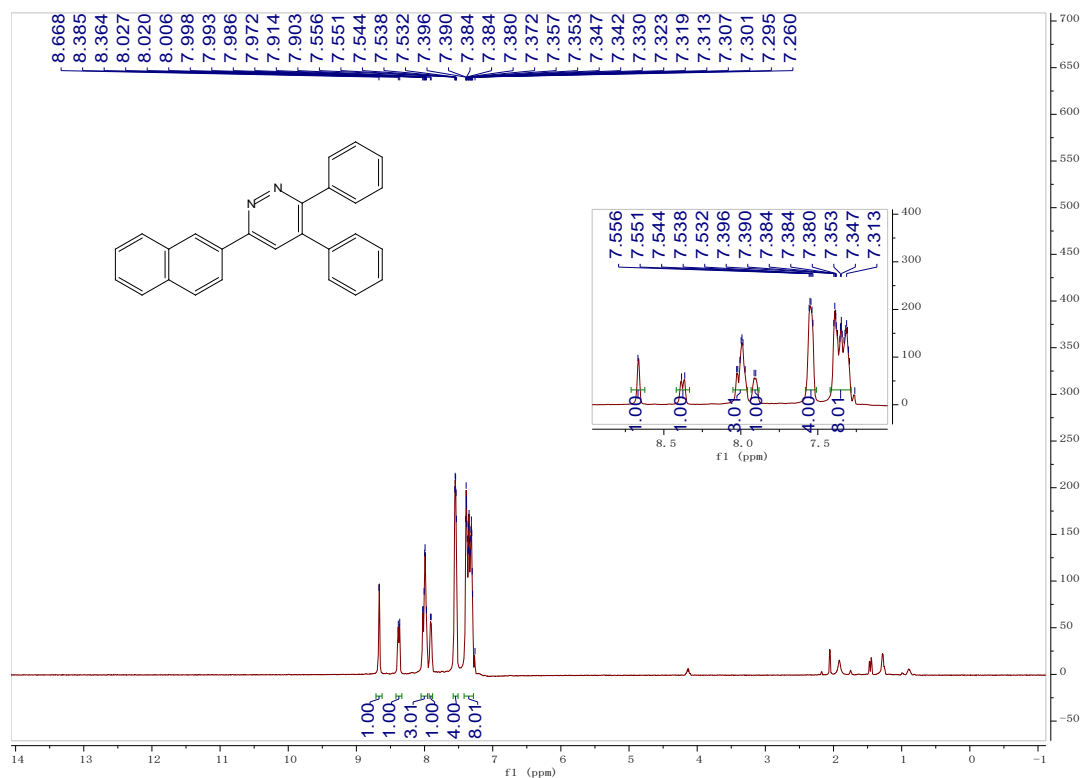

Figure S24.  $^1\text{H}$  NMR (400 MHz,  $\text{CDCl}_3$ ) of compound **3h**

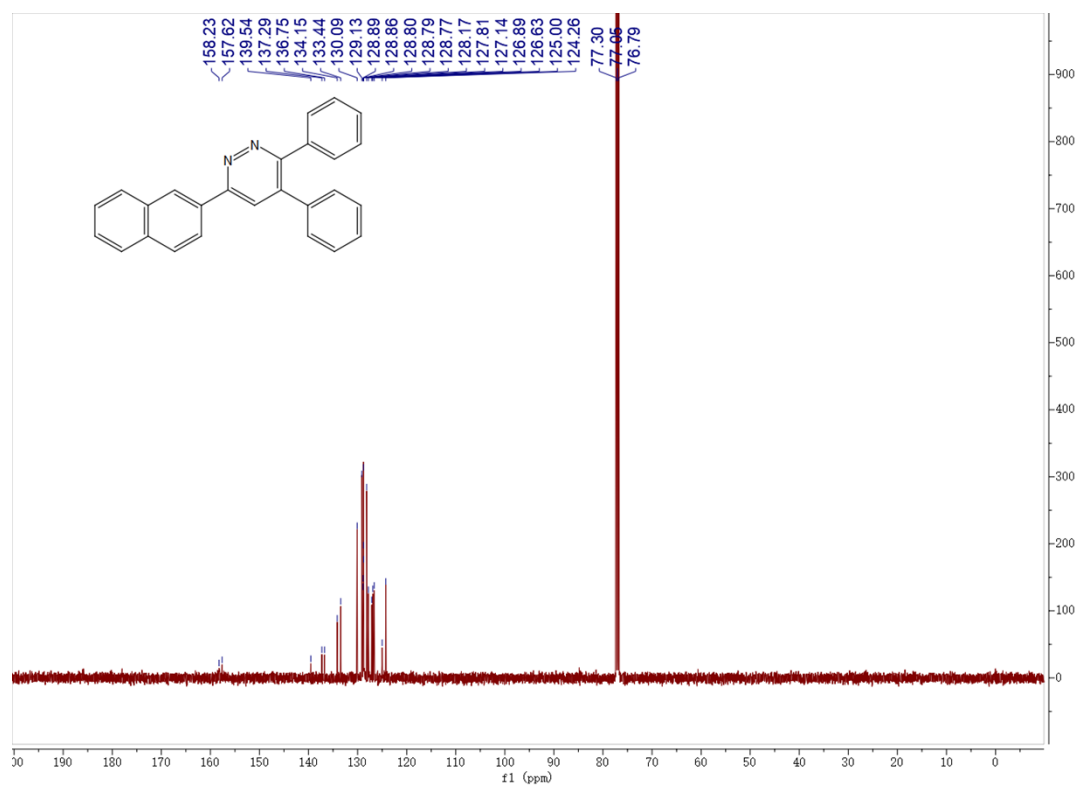

Figure S25. <sup>13</sup>C NMR (125 MHz, CDCl<sub>3</sub>) of compound 3h

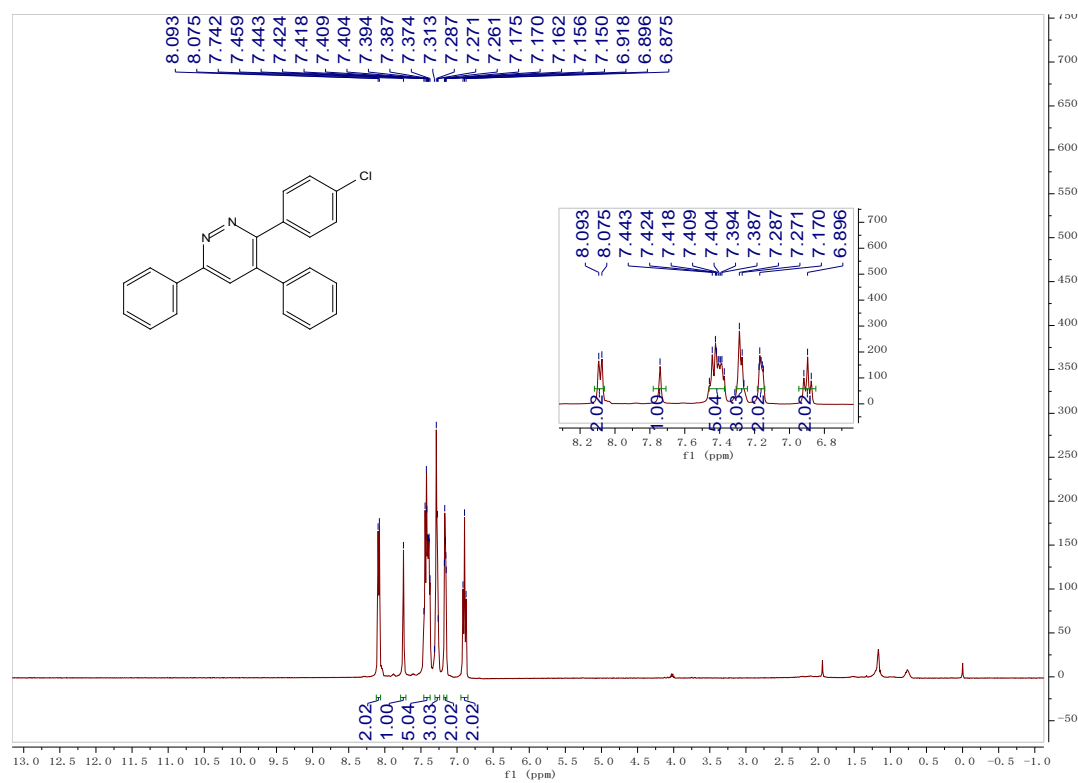

Figure S26. <sup>1</sup>H NMR (400 MHz, CDCl<sub>3</sub>) of compound 3i

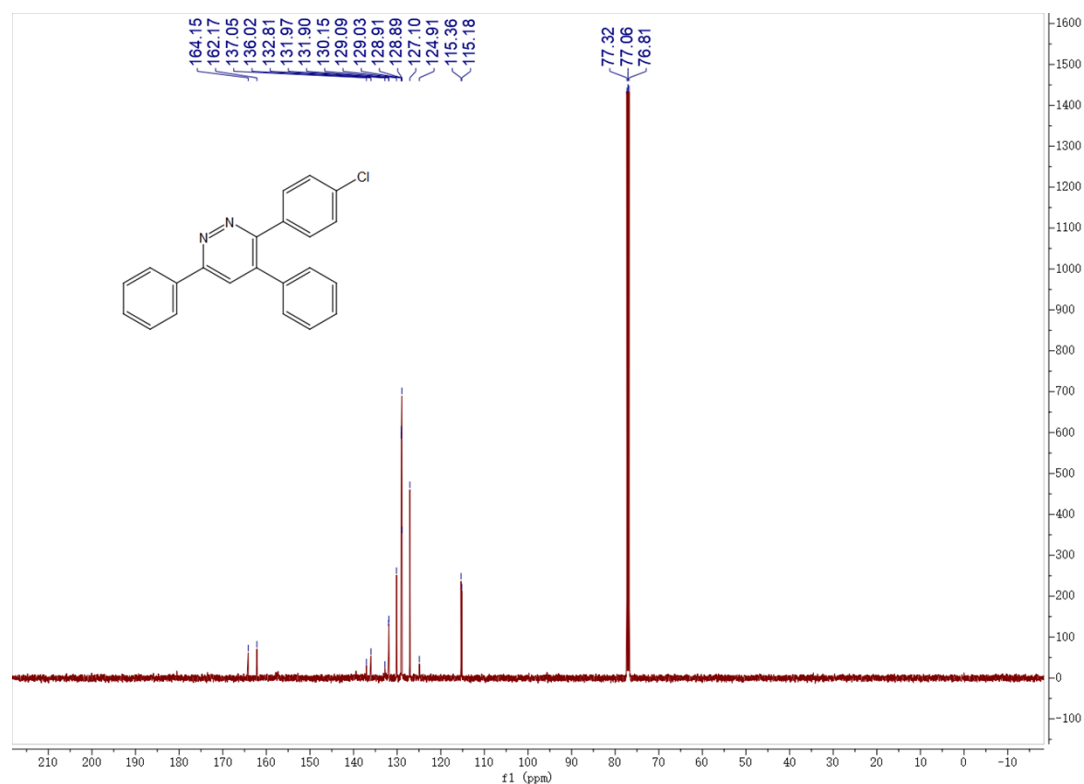

Figure S27. <sup>13</sup>C NMR (125 MHz, CDCl<sub>3</sub>) of compound 3i

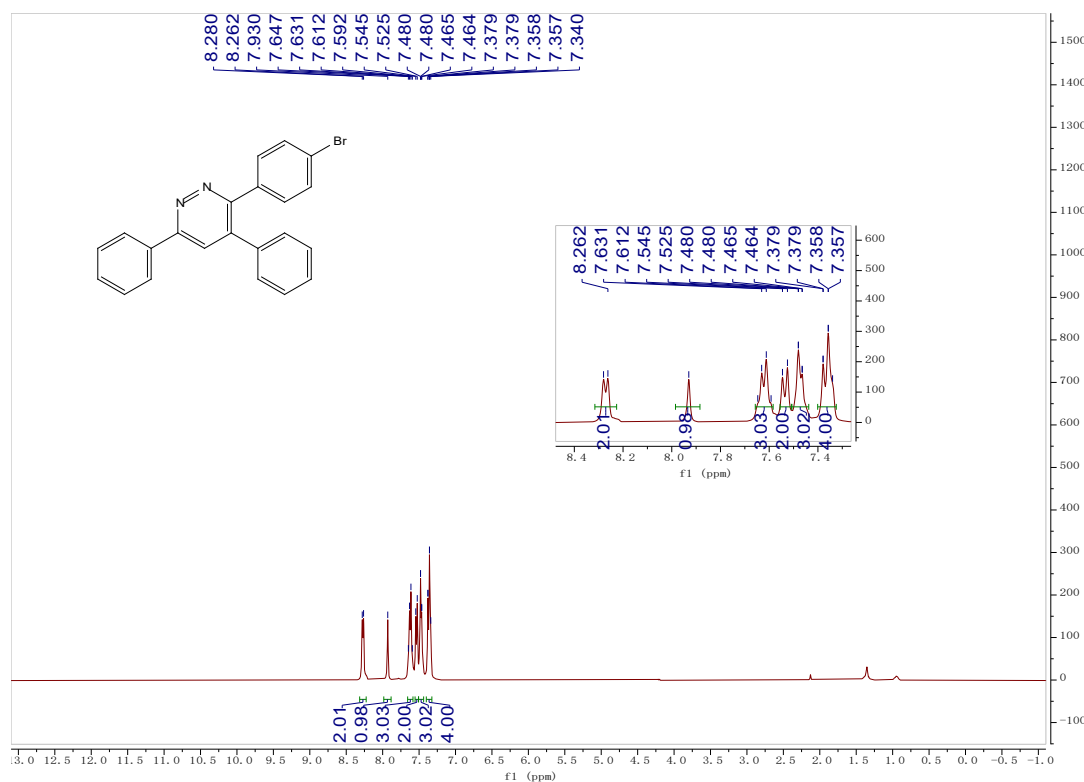

Figure S28. <sup>1</sup>H NMR (400 MHz, CDCl<sub>3</sub>) of compound 3j

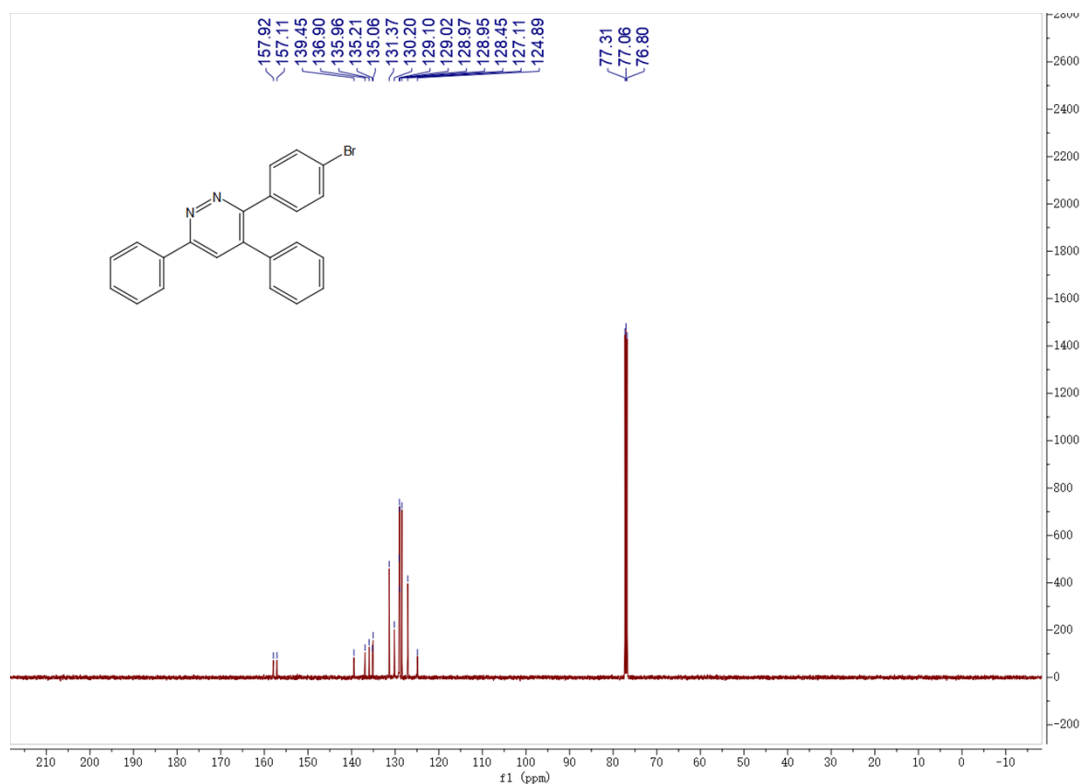

Figure S29. <sup>13</sup>C NMR (125 MHz, CDCl<sub>3</sub>) of compound 3j

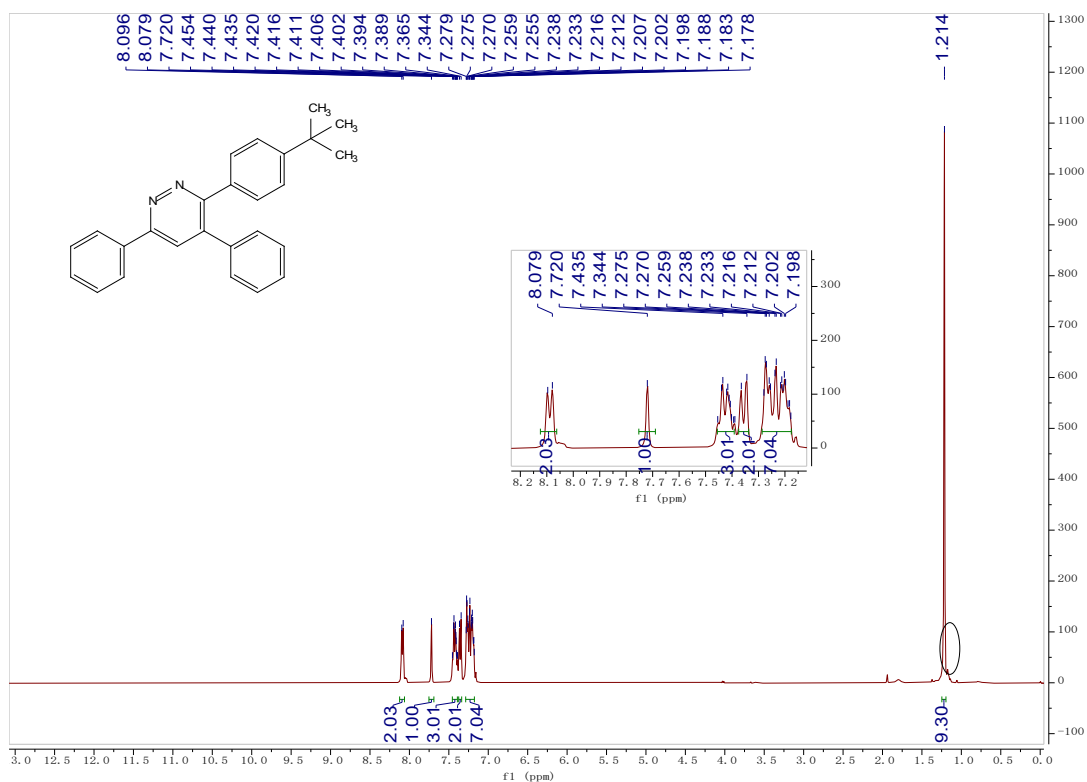

Figure S30. <sup>1</sup>H NMR (400 MHz, CDCl<sub>3</sub>) of compound 3k

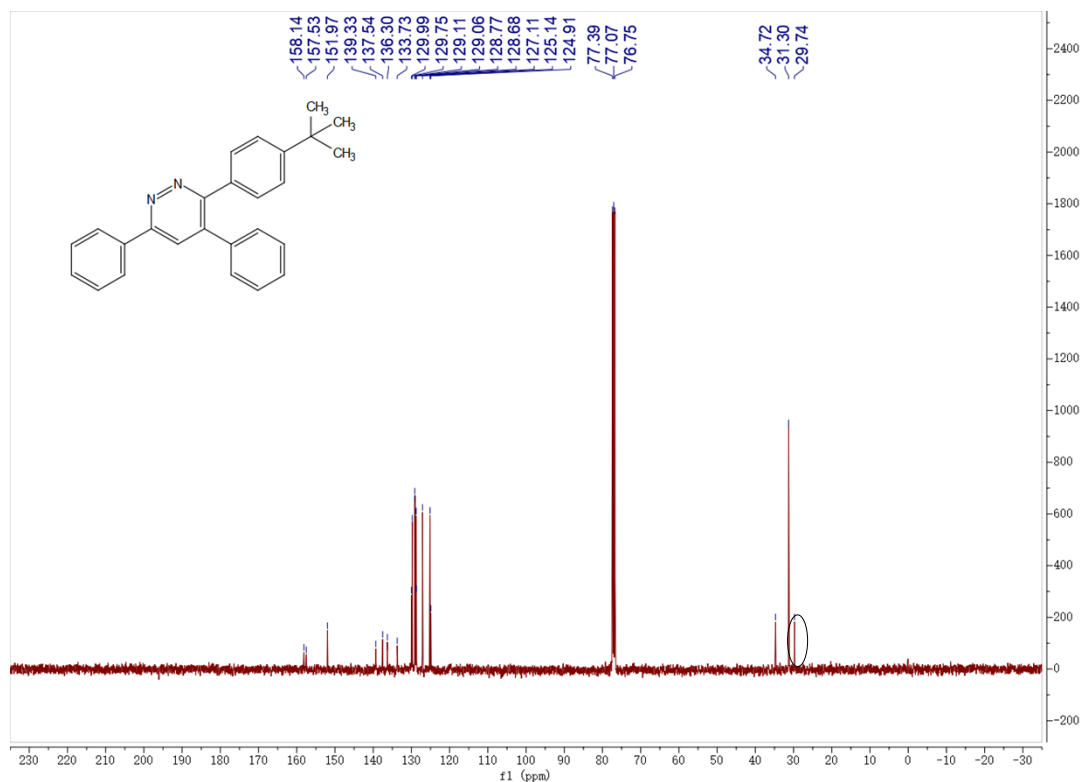

Figure S31. <sup>13</sup>C NMR (100 MHz, CDCl<sub>3</sub>) of compound 3k

The peak in black oval is the signal of Apiezon grease.

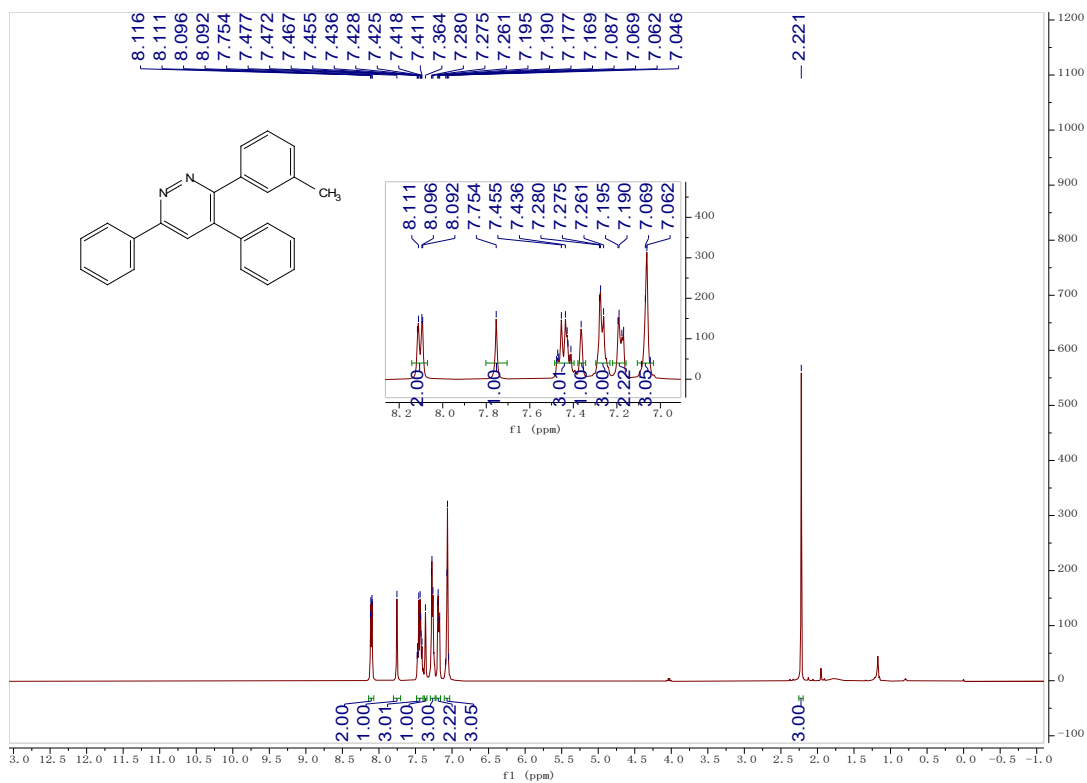

Figure S32. <sup>1</sup>H NMR (400 MHz, CDCl<sub>3</sub>) of compound 3l

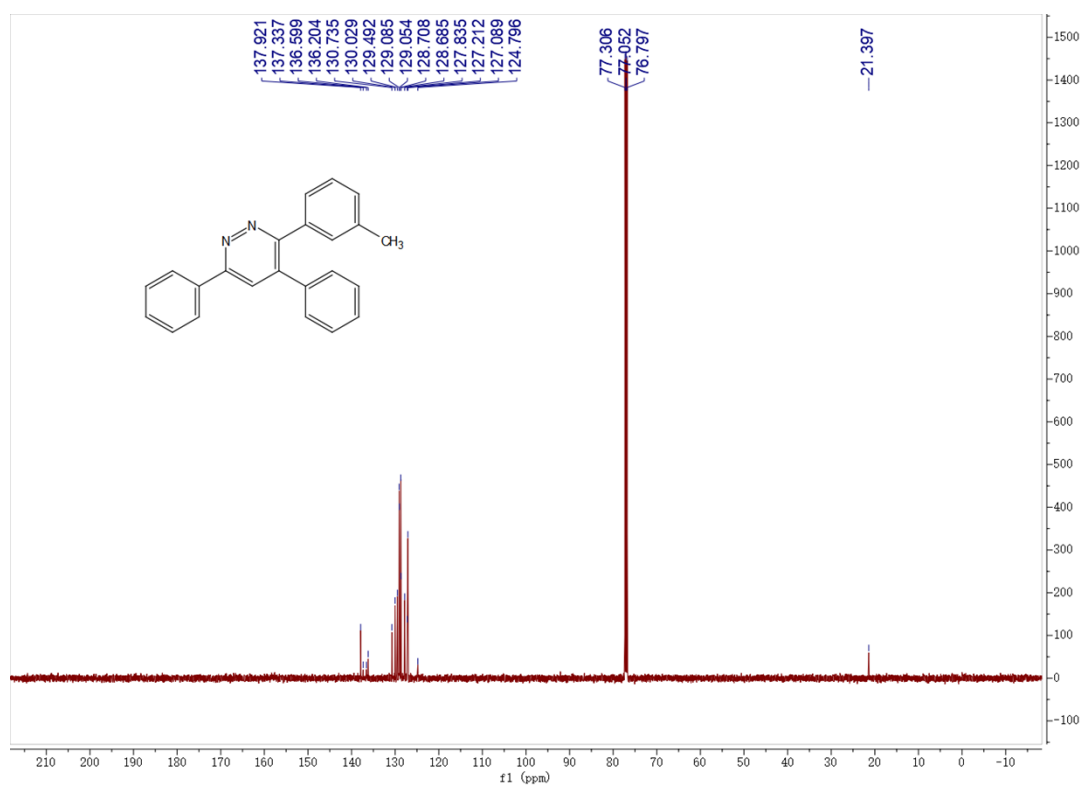

Figure S33. <sup>13</sup>C NMR (125 MHz, CDCl<sub>3</sub>) of compound 3l

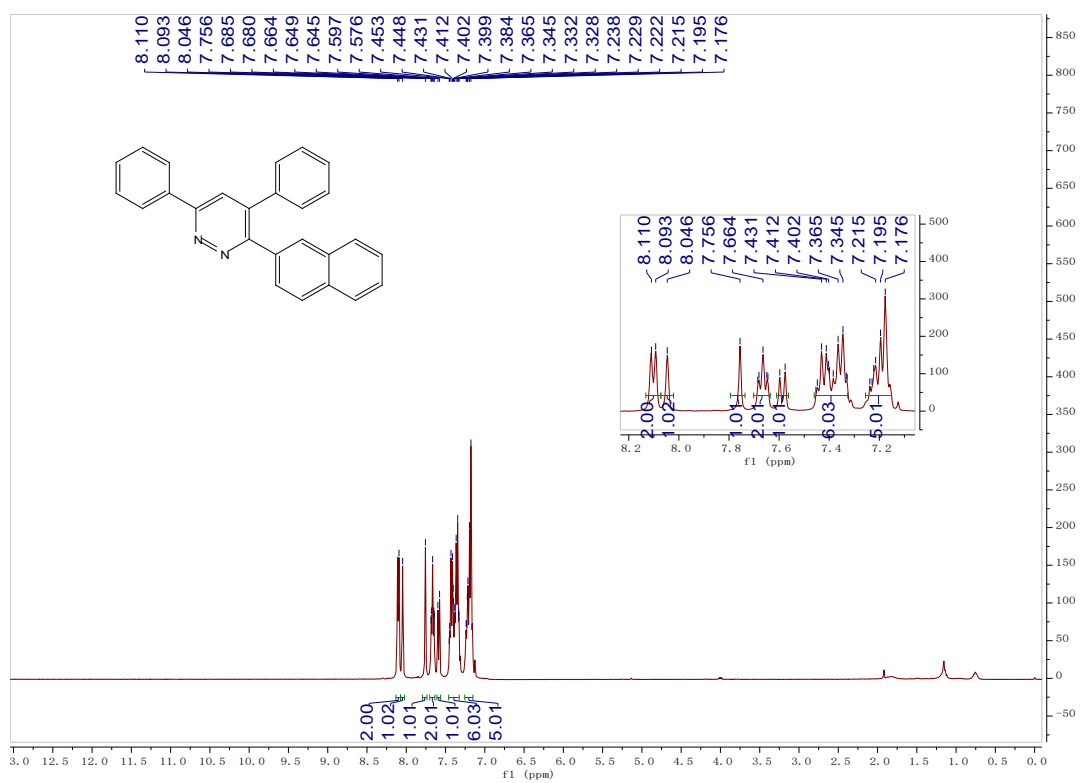

Figure S34. <sup>1</sup>H NMR (400 MHz, CDCl<sub>3</sub>) of compound 3m

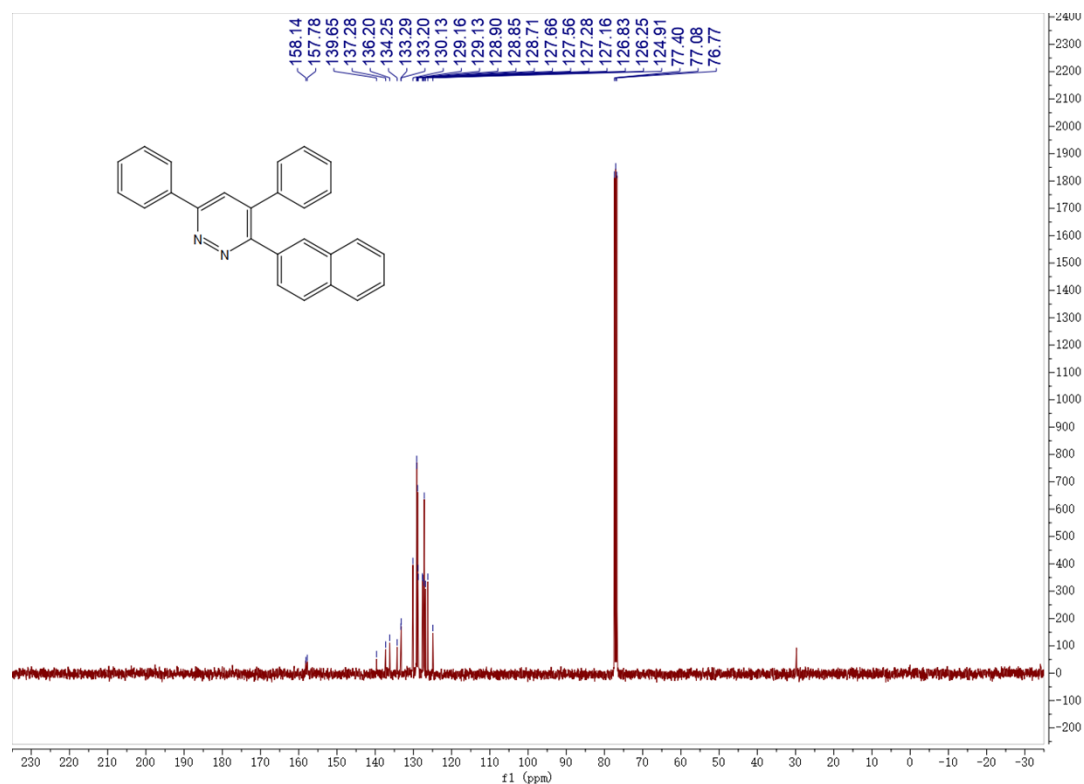

Figure S35.  $^{13}\text{C}$  NMR (100 MHz,  $\text{CDCl}_3$ ) of compound **3m**

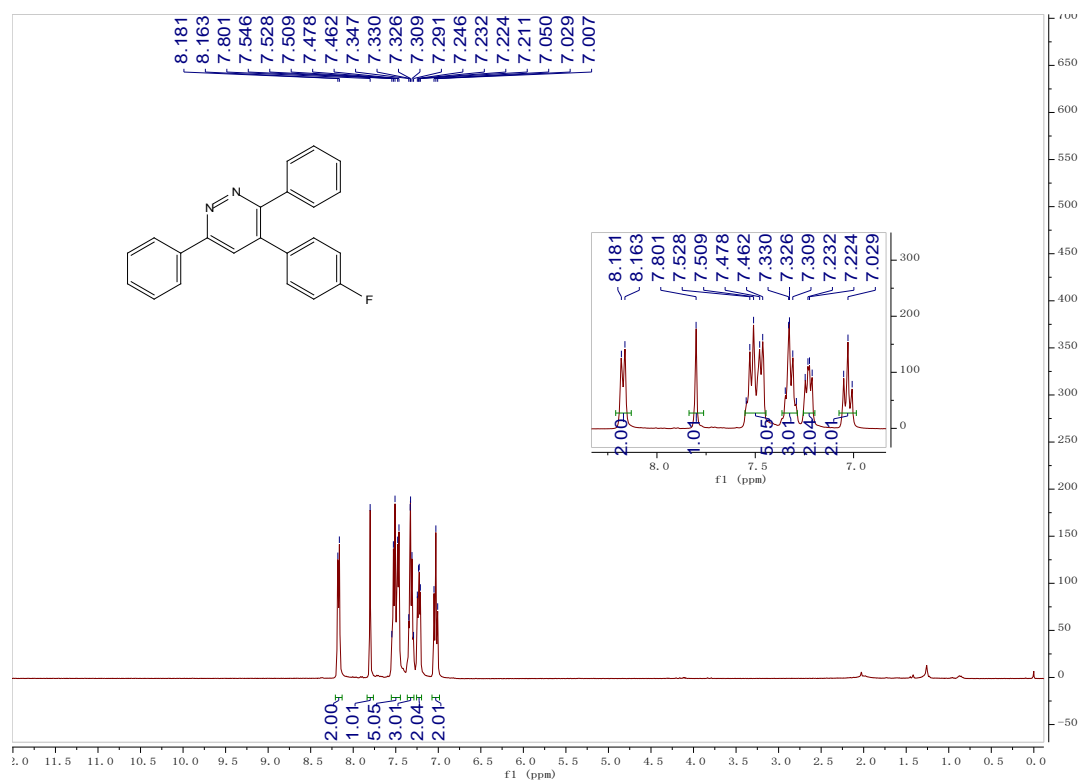

Figure S36.  $^1\text{H}$  NMR (400 MHz,  $\text{CDCl}_3$ ) of compound **3n**

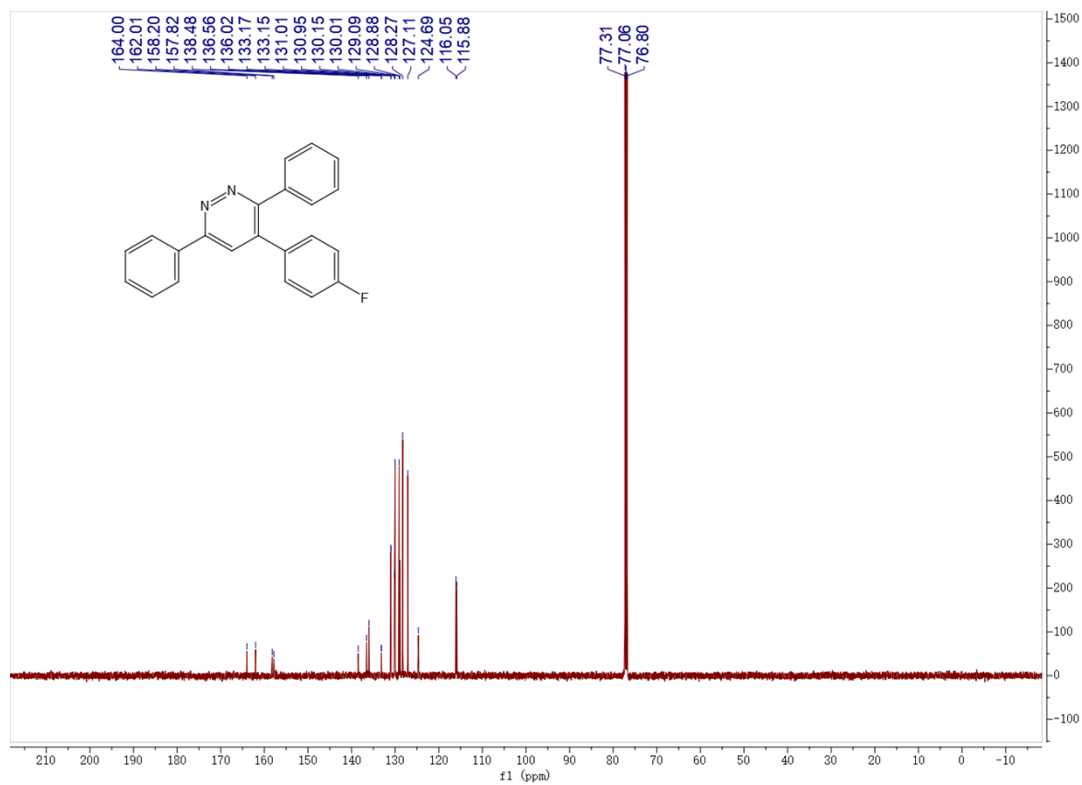

Figure S37. <sup>13</sup>C NMR (125 MHz, CDCl<sub>3</sub>) of compound 3n

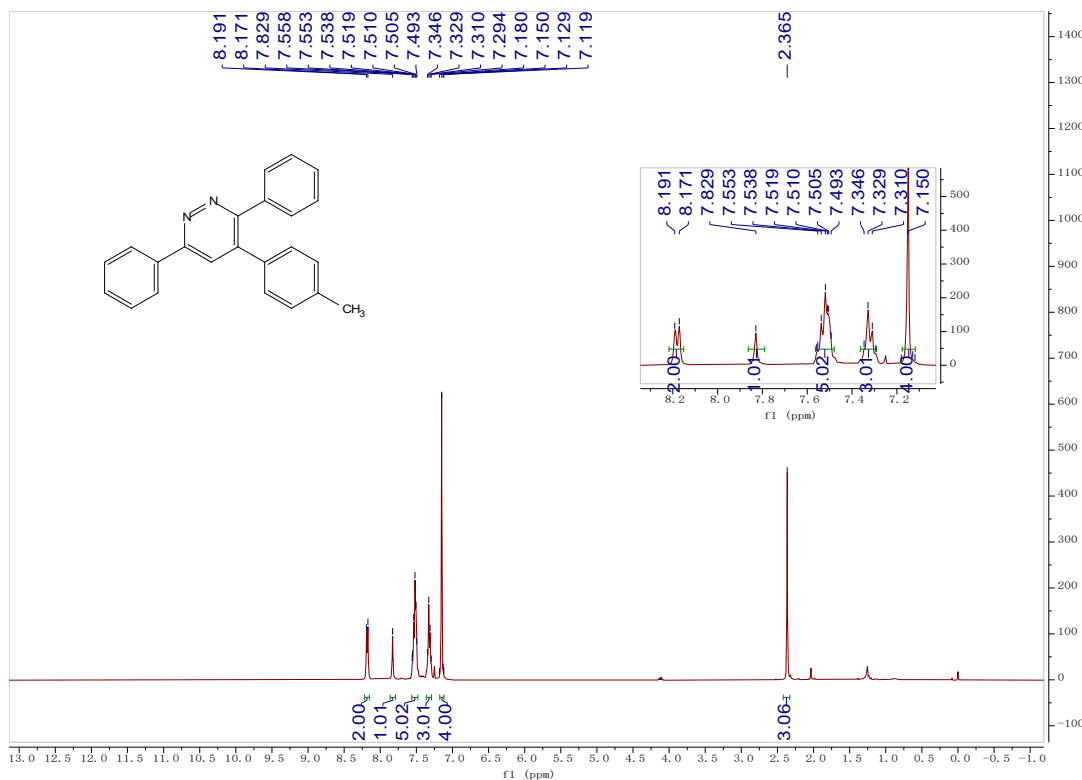

Figure S38. <sup>1</sup>H NMR (400 MHz, CDCl<sub>3</sub>) of compound 3o



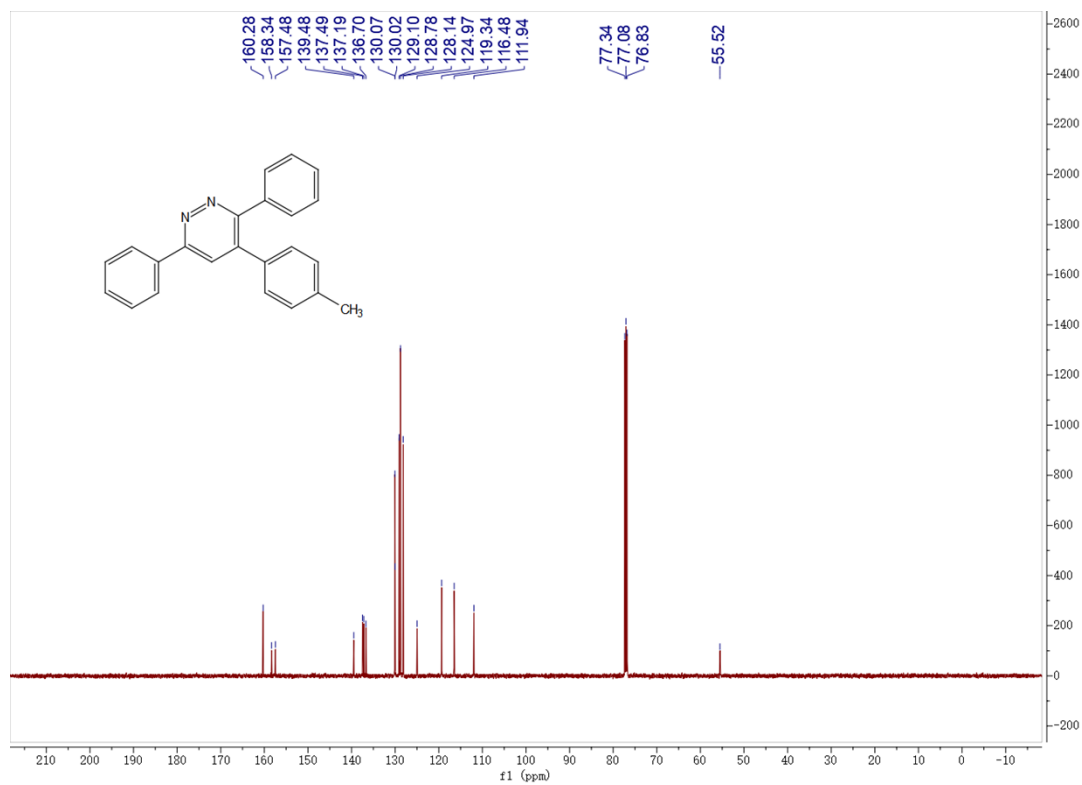

Figure S39. <sup>13</sup>C NMR (125 MHz, CDCl<sub>3</sub>) of compound **3o**

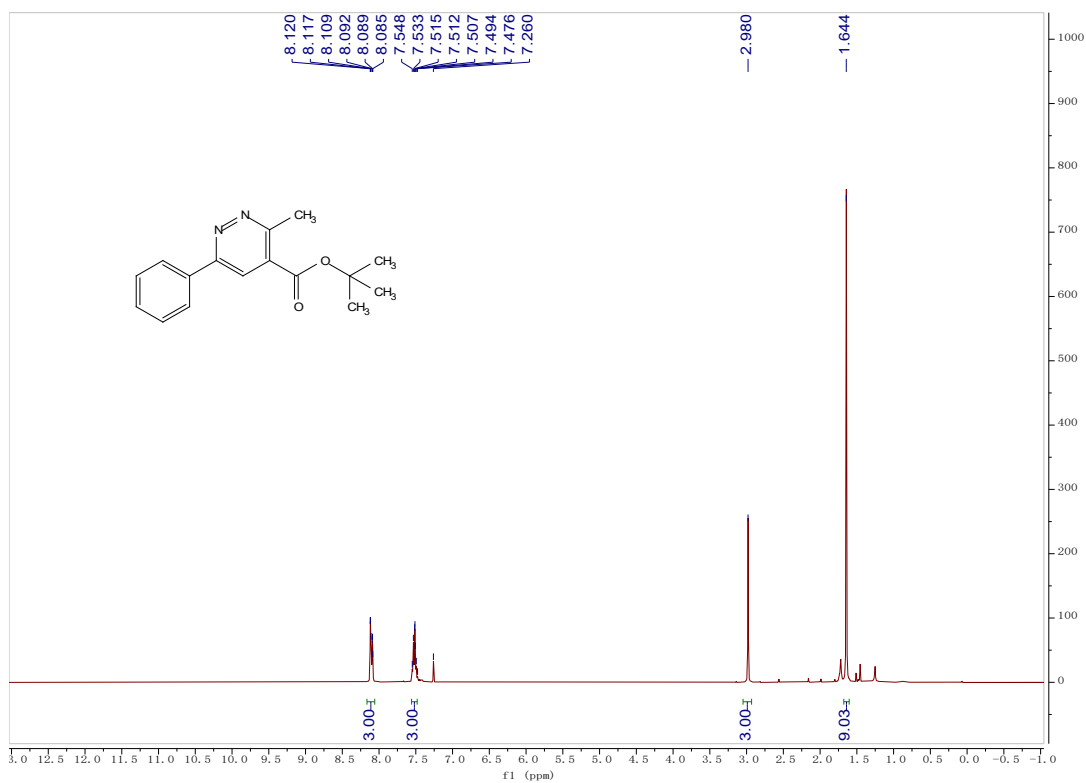

Figure S40. <sup>1</sup>H NMR (400 MHz, CDCl<sub>3</sub>) of compound **3p**

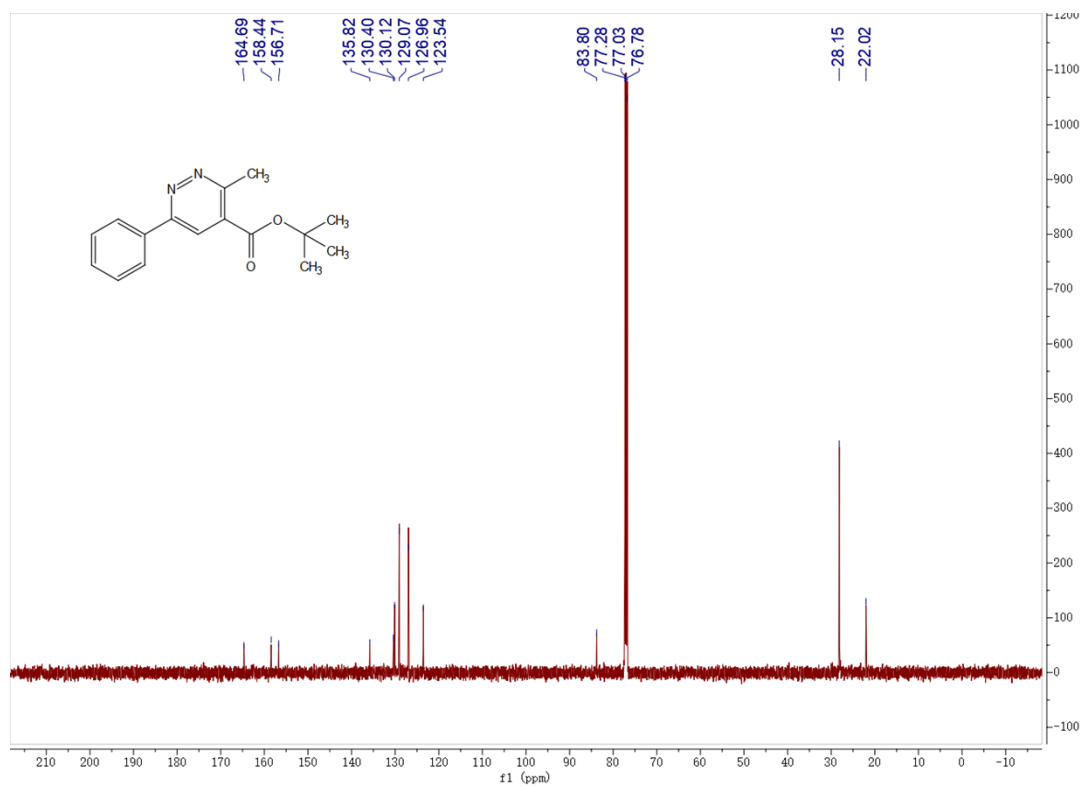

Figure S41. <sup>13</sup>C NMR (125 MHz, CDCl<sub>3</sub>) of compound 3p

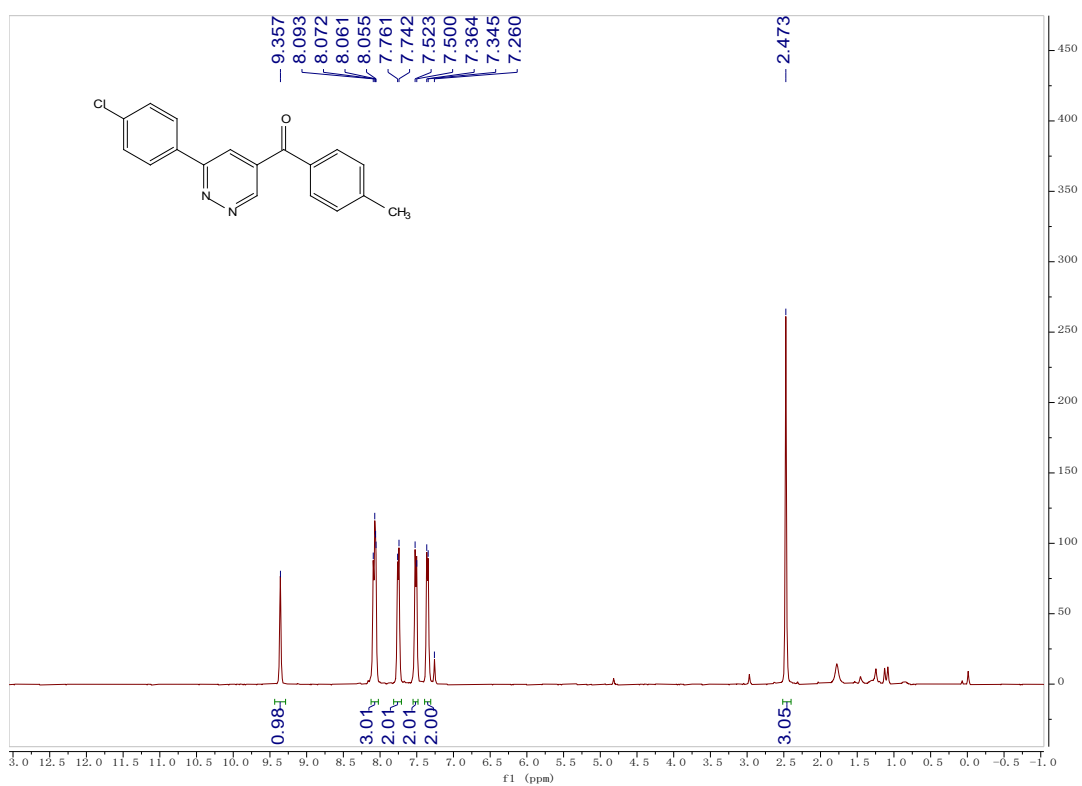

Figure S42. <sup>1</sup>H NMR (500 MHz, CDCl<sub>3</sub>) of compound 6a

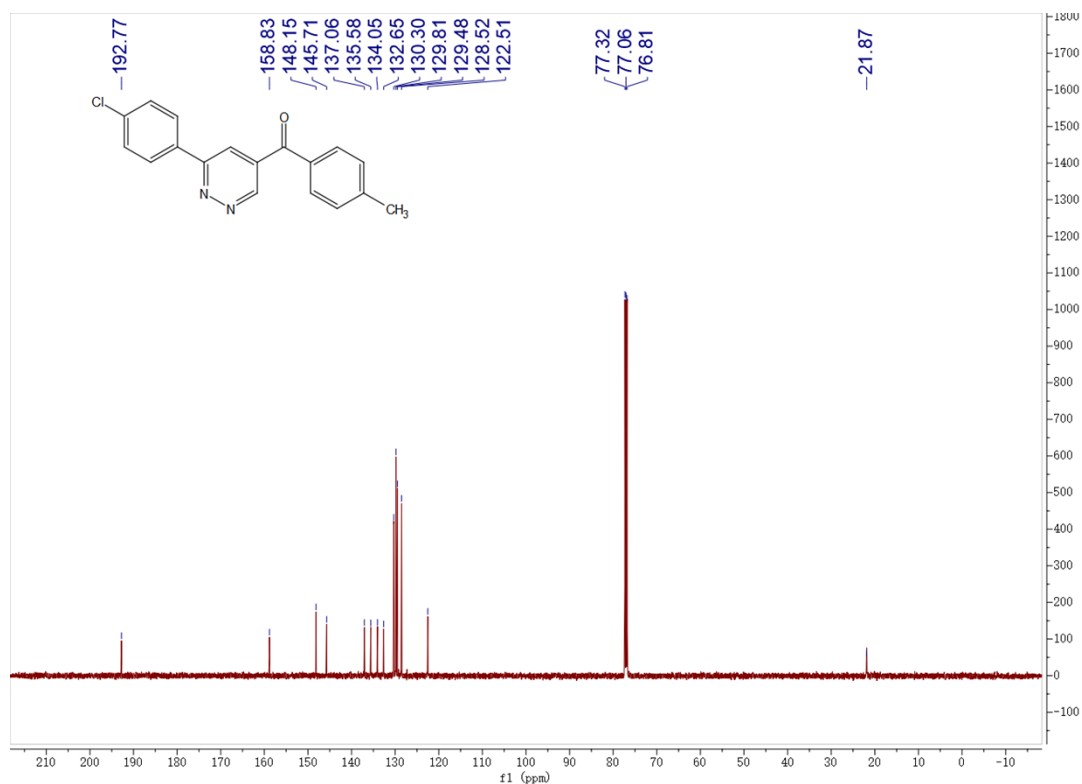

Figure S43. <sup>13</sup>C NMR (125 MHz, CDCl<sub>3</sub>) of compound 6a

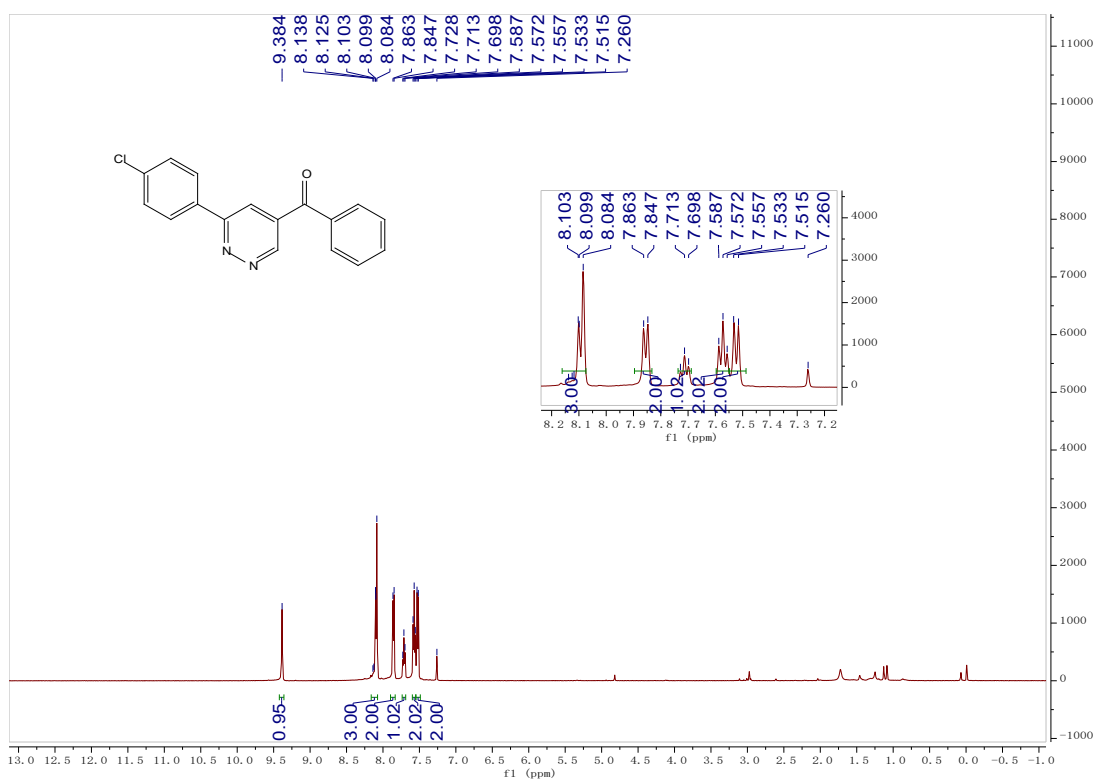

Figure S44. <sup>1</sup>H NMR (500 MHz, CDCl<sub>3</sub>) of compound 6b

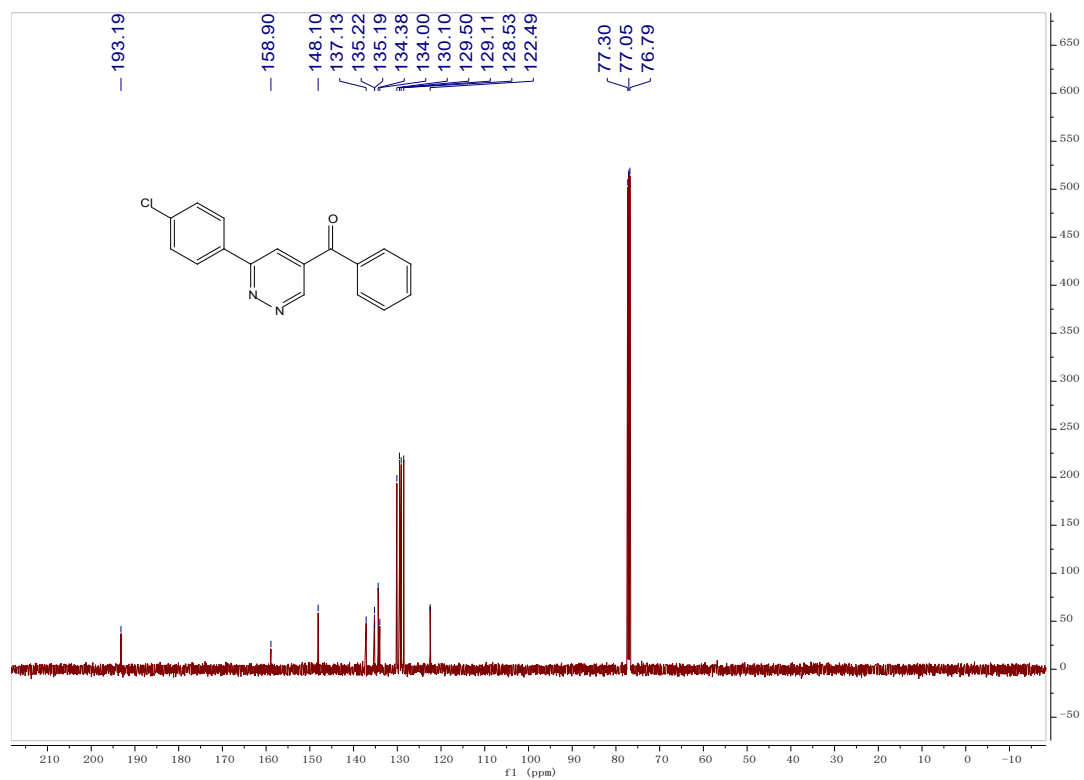

Figure S45. <sup>13</sup>C NMR (125 MHz, CDCl<sub>3</sub>) of compound 6b

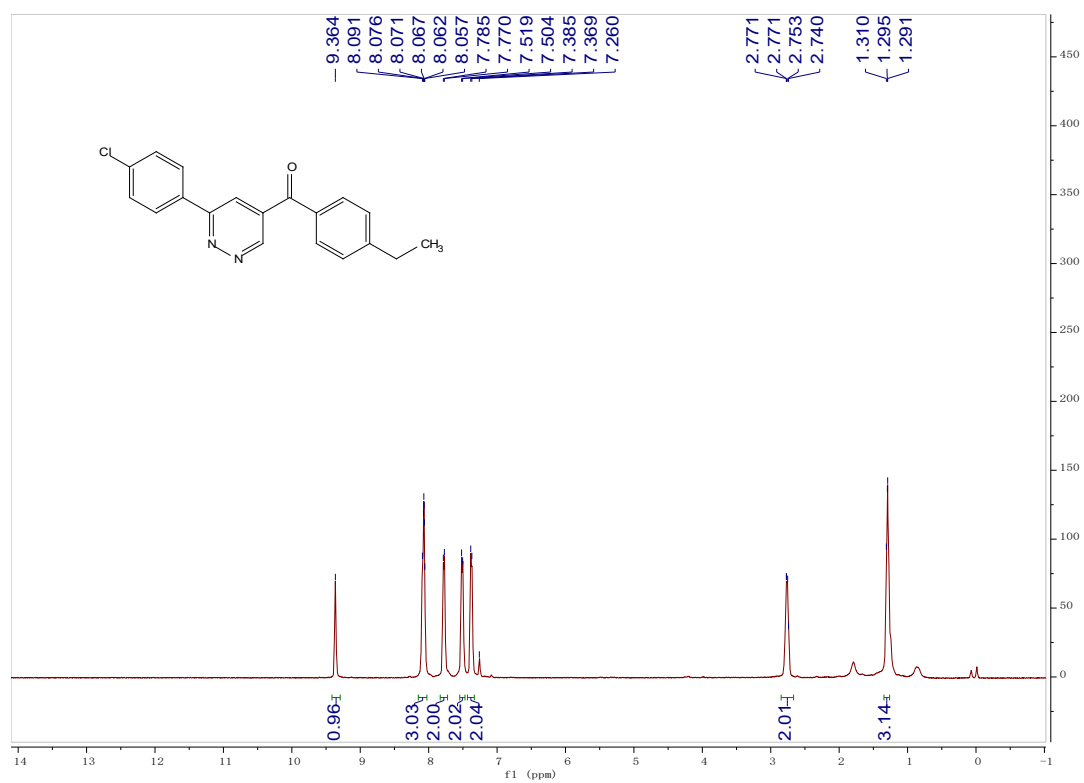

Figure S46. <sup>1</sup>H NMR (400 MHz, CDCl<sub>3</sub>) of compound 6c

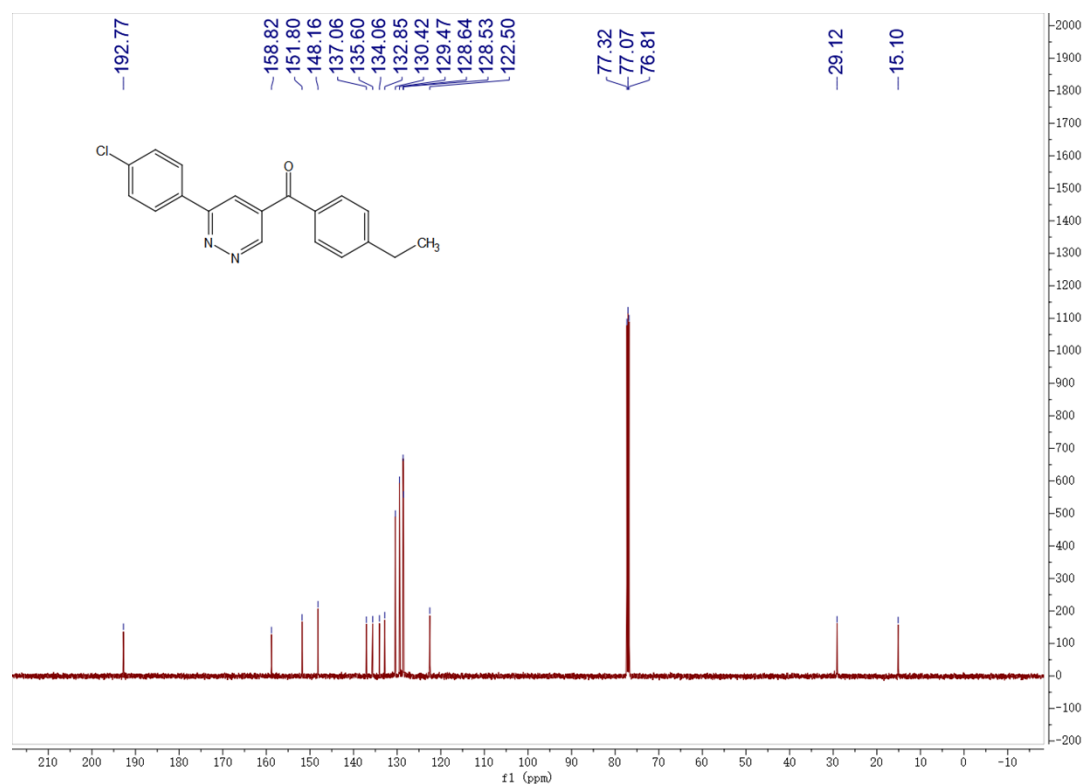

Figure S47. <sup>13</sup>C NMR (125 MHz, CDCl<sub>3</sub>) of compound 6c

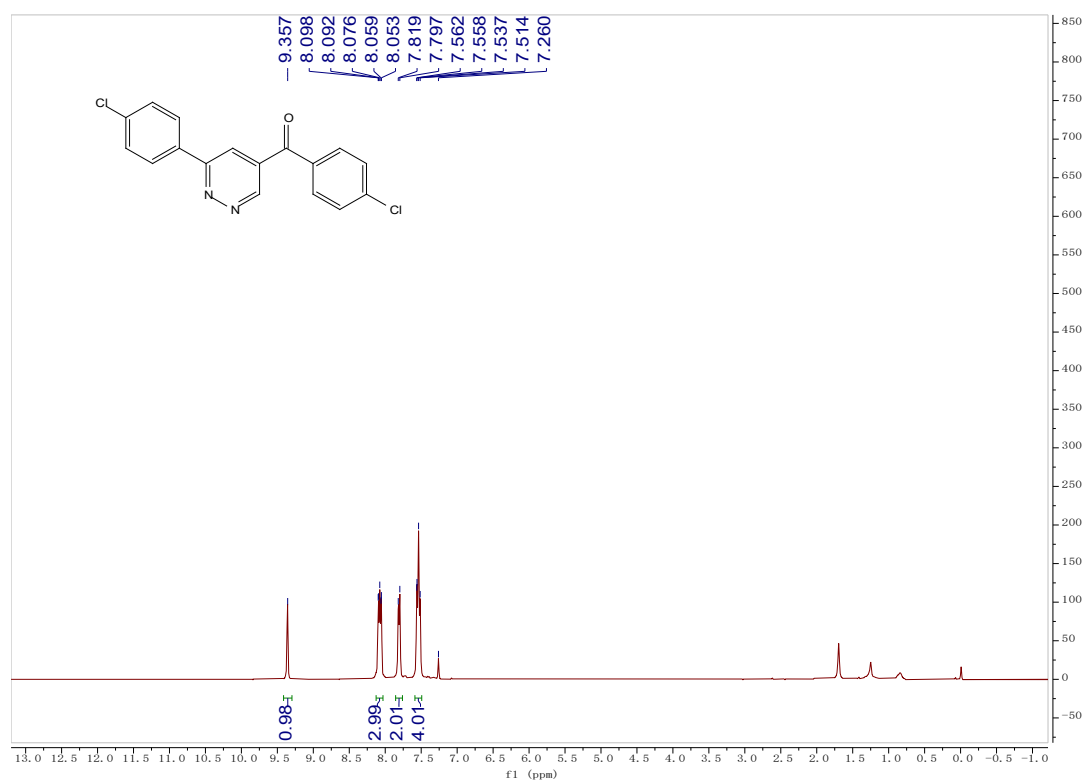

Figure S48. <sup>1</sup>H NMR (400 MHz, CDCl<sub>3</sub>) of compound 6d

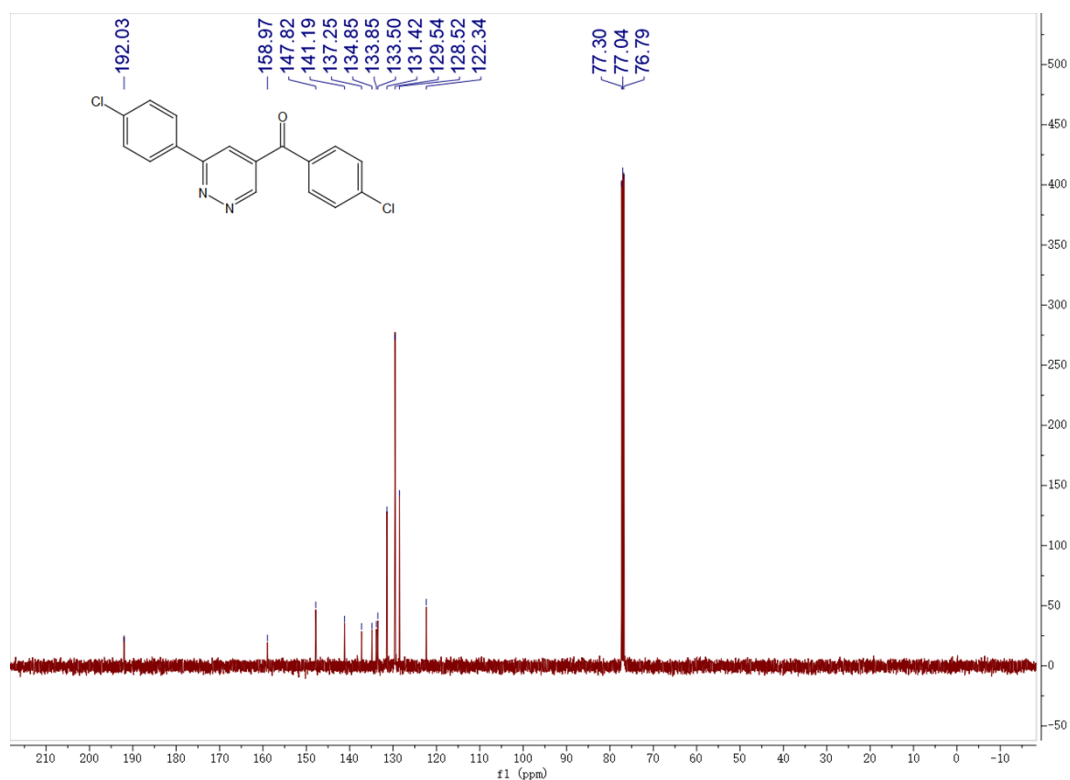

Figure S49. <sup>13</sup>C NMR (125 MHz, CDCl<sub>3</sub>) of compound 6d

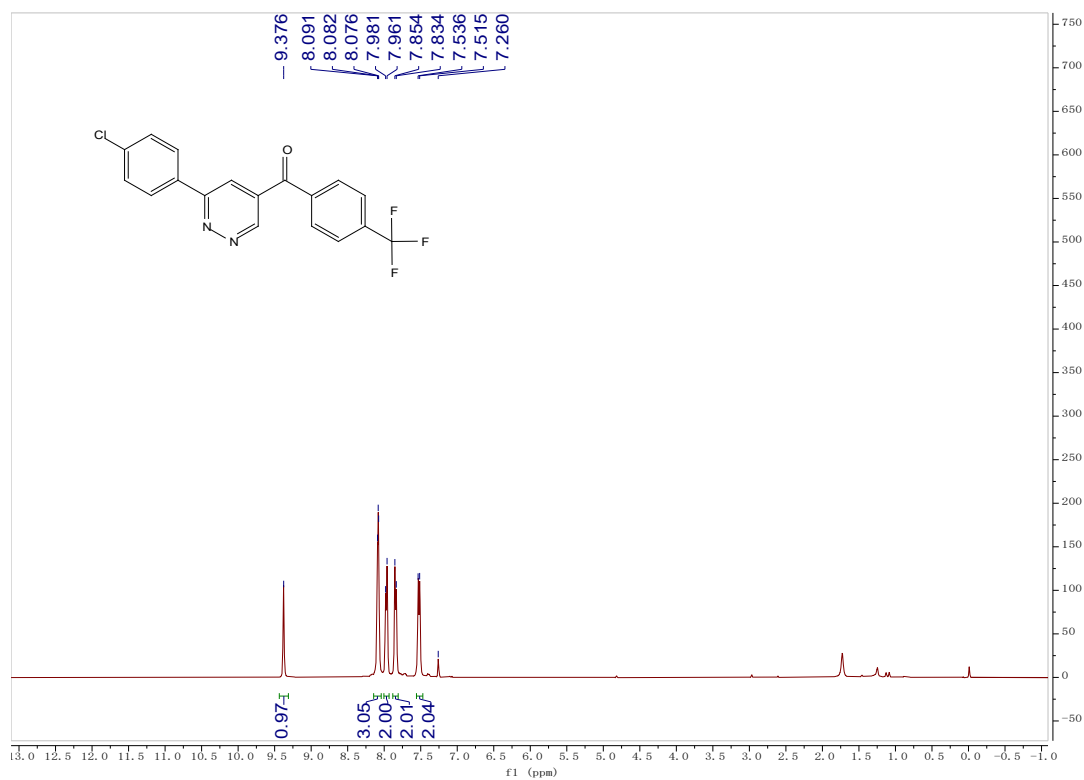

Figure S50. <sup>1</sup>H NMR (400 MHz, CDCl<sub>3</sub>) of compound 6e

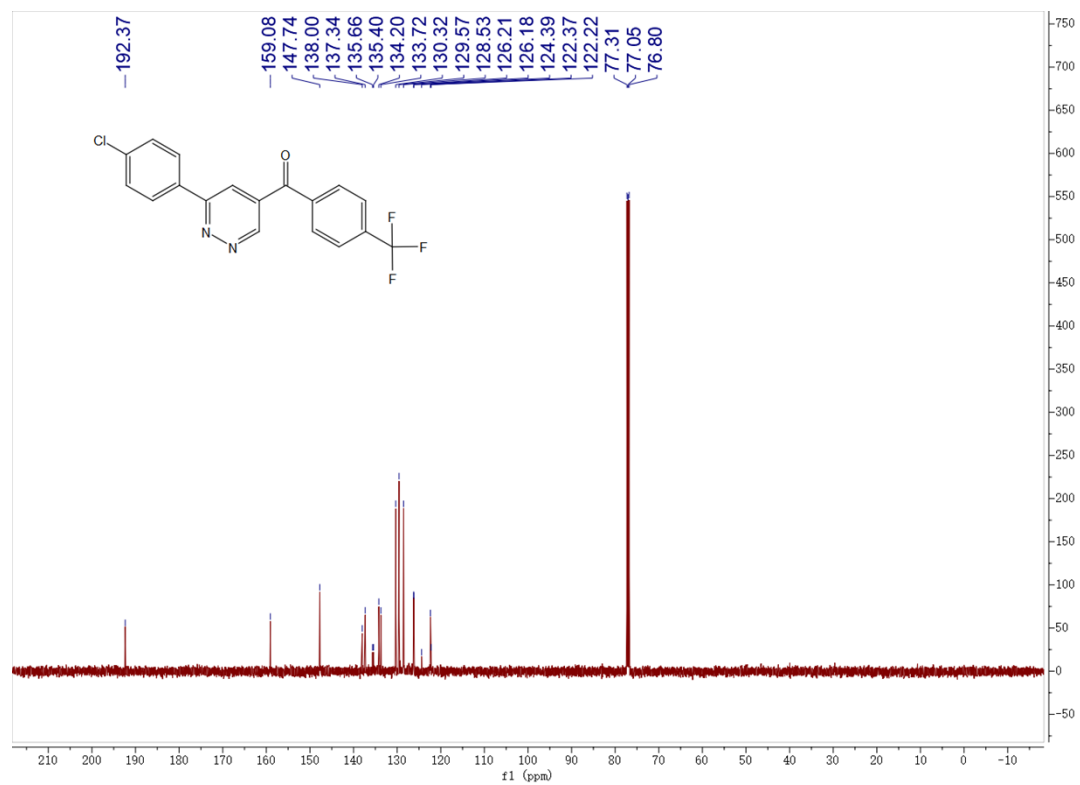

Figure S51. <sup>13</sup>C NMR (125 MHz, CDCl<sub>3</sub>) of compound 6e

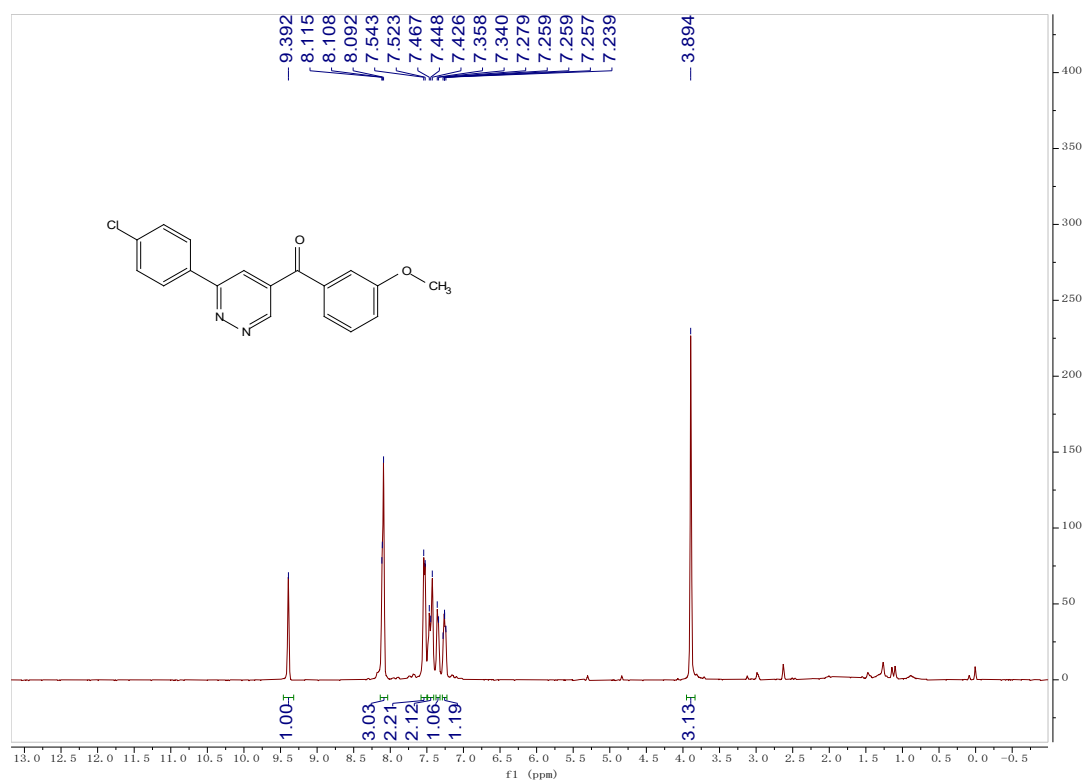

Figure S52. <sup>1</sup>H NMR (400 MHz, CDCl<sub>3</sub>) of compound 6f

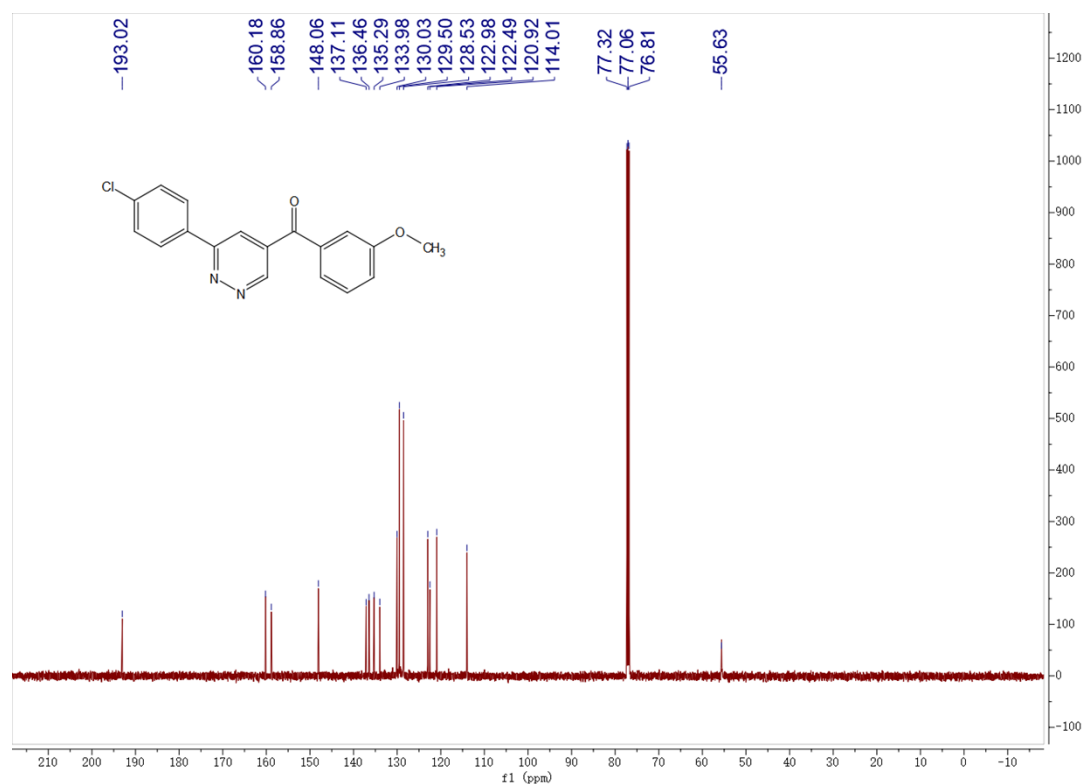

Figure S53. <sup>13</sup>C NMR (125 MHz, CDCl<sub>3</sub>) of compound 6f

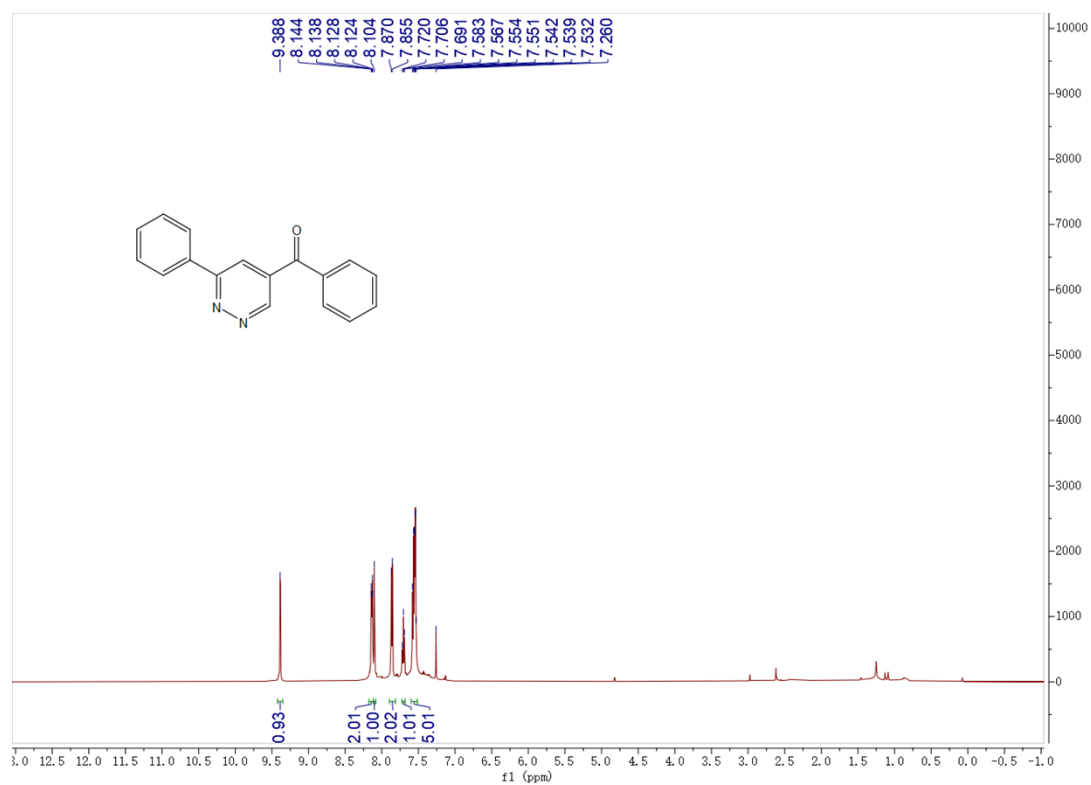

Figure S54. <sup>1</sup>H NMR (500 MHz, CDCl<sub>3</sub>) of compound 6g



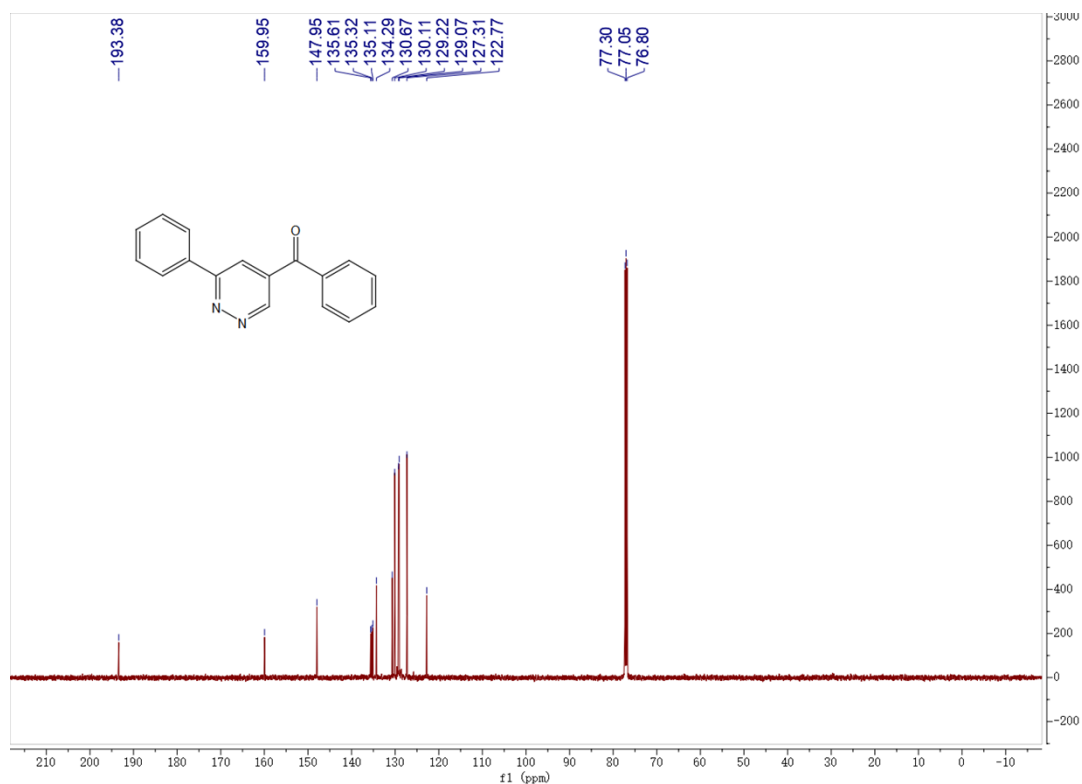

Figure S55. <sup>13</sup>C NMR (125 MHz, CDCl<sub>3</sub>) of compound 6g

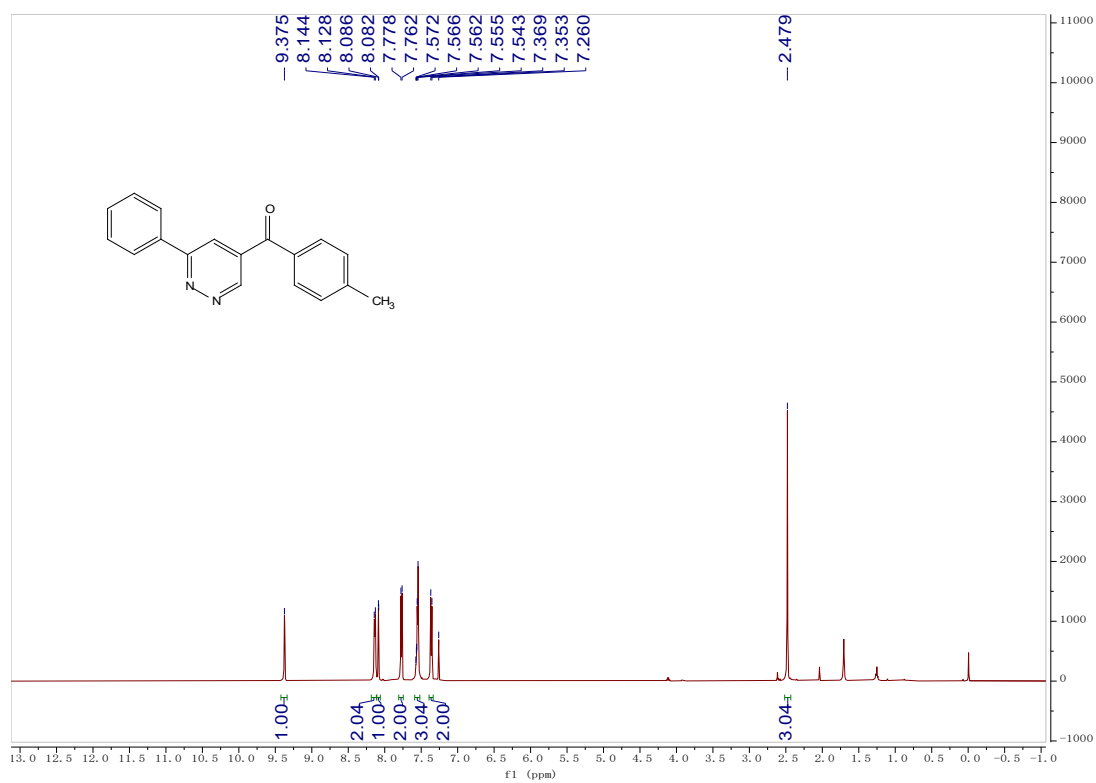

Figure S56. <sup>1</sup>H NMR (500 MHz, CDCl<sub>3</sub>) of compound 6h

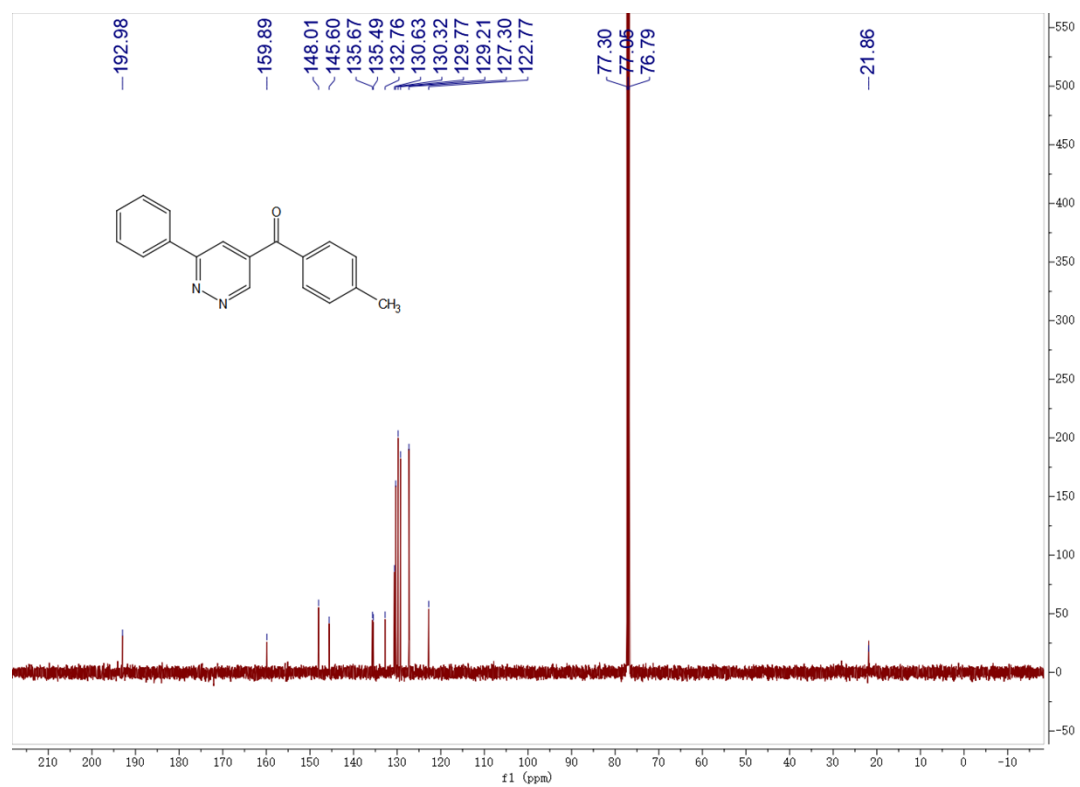

Figure S57. <sup>13</sup>C NMR (125 MHz, CDCl<sub>3</sub>) of compound 6h

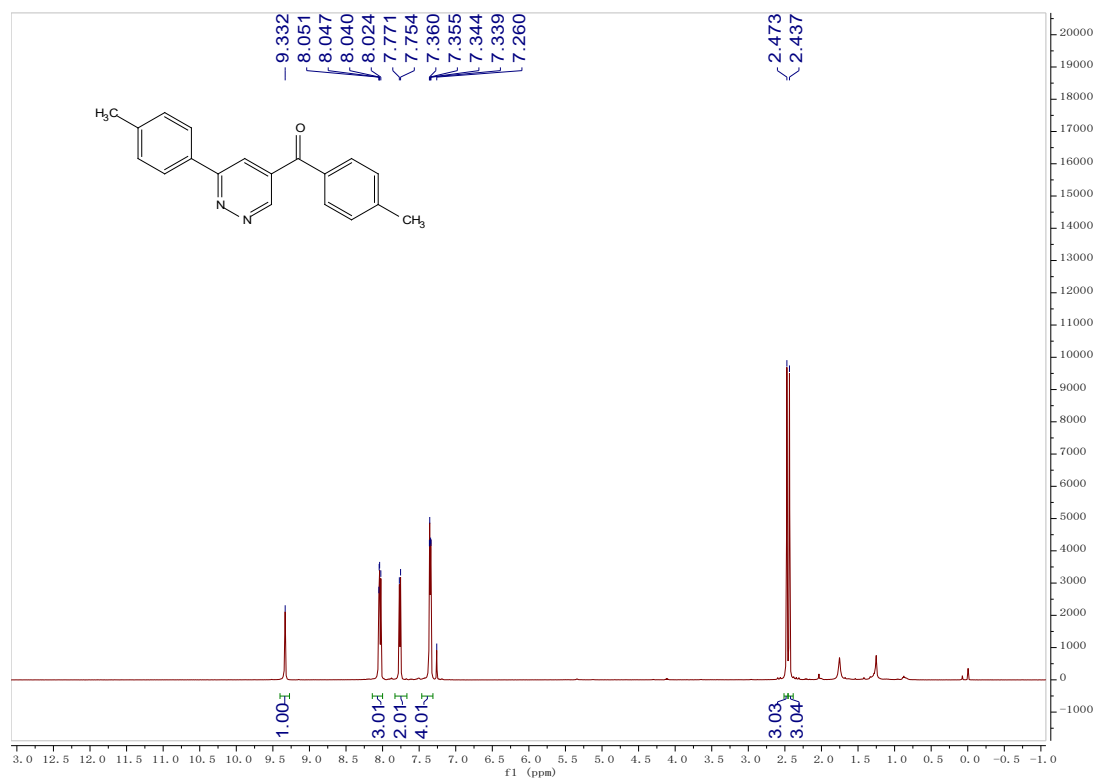

Figure S58. <sup>1</sup>H NMR (500 MHz, CDCl<sub>3</sub>) of compound 6i

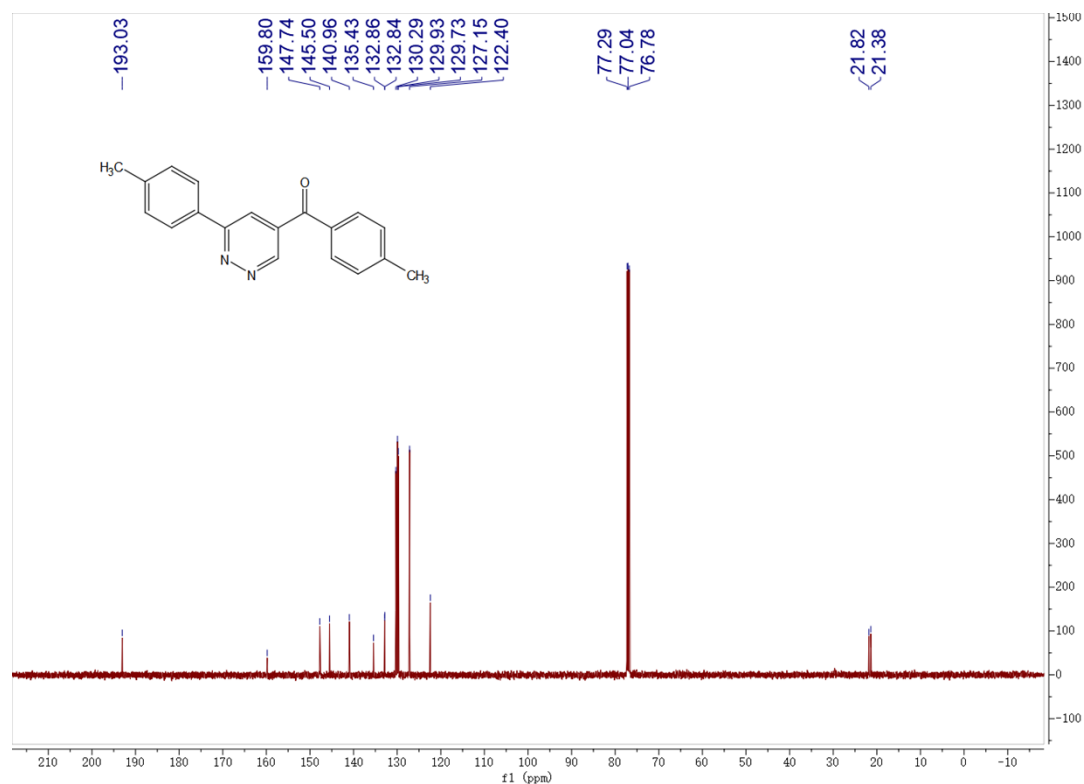

Figure S59. <sup>13</sup>C NMR (125 MHz, CDCl<sub>3</sub>) of compound **6i**

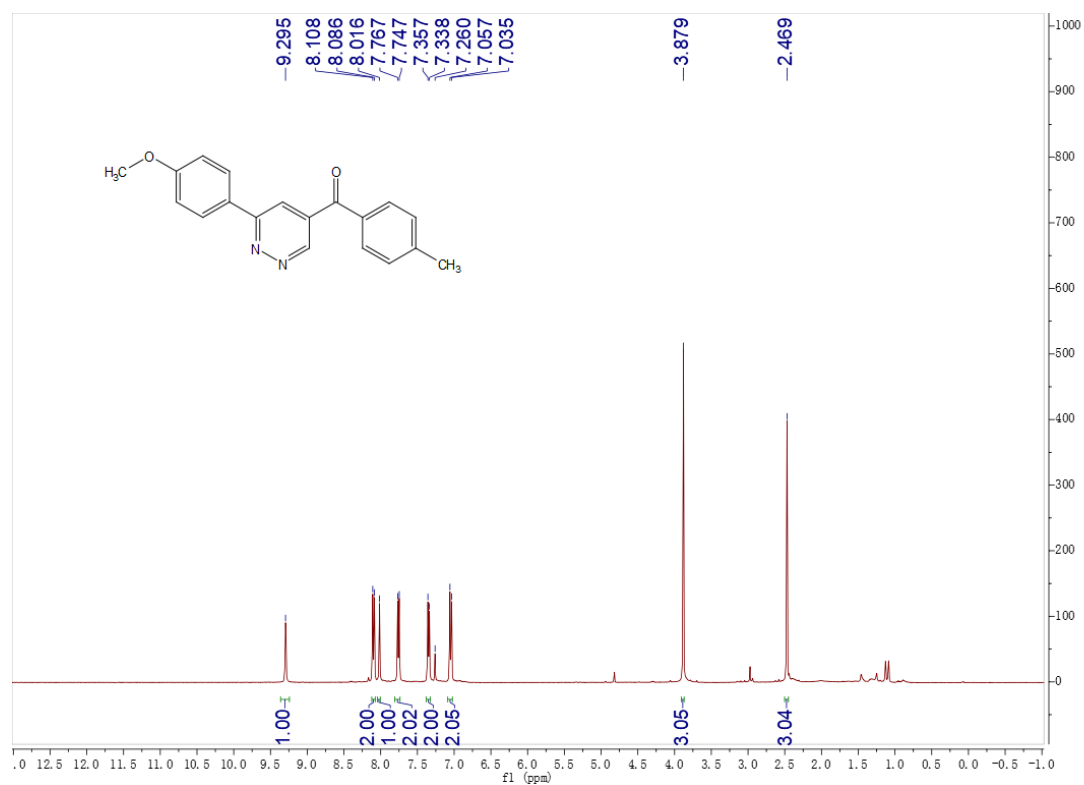

Figure S60. <sup>1</sup>H NMR (400 MHz, CDCl<sub>3</sub>) of compound **6j**

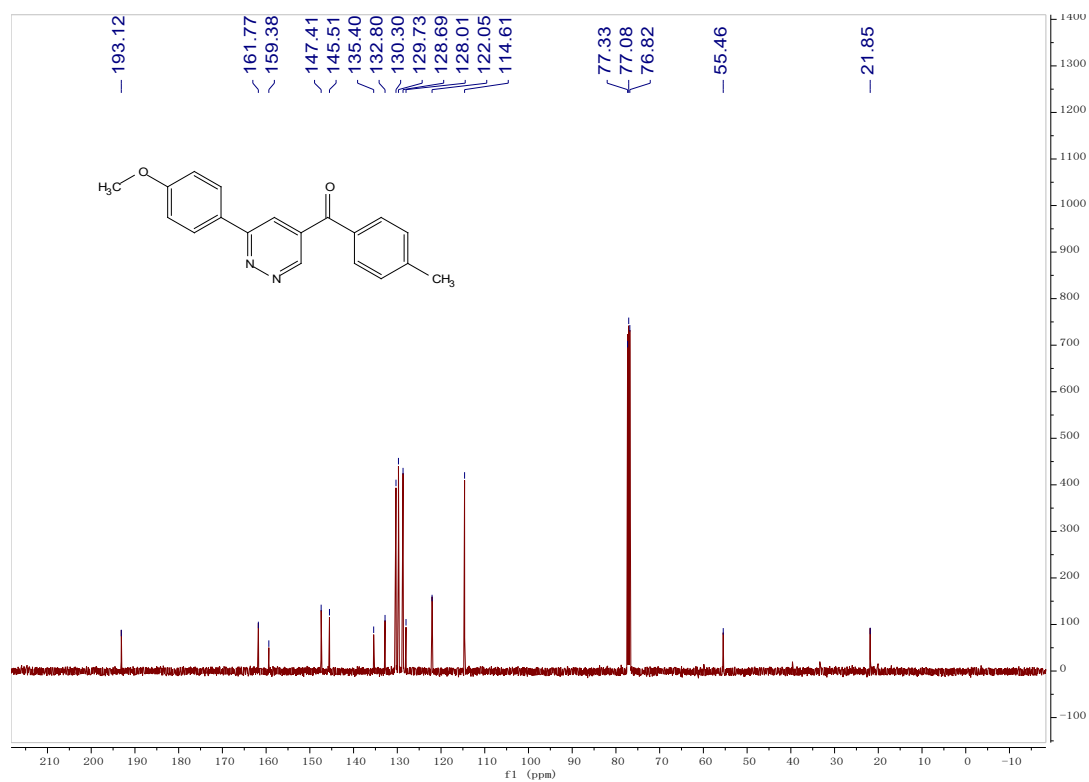

Figure S61. <sup>13</sup>C NMR (125 MHz, CDCl<sub>3</sub>) of compound 6j

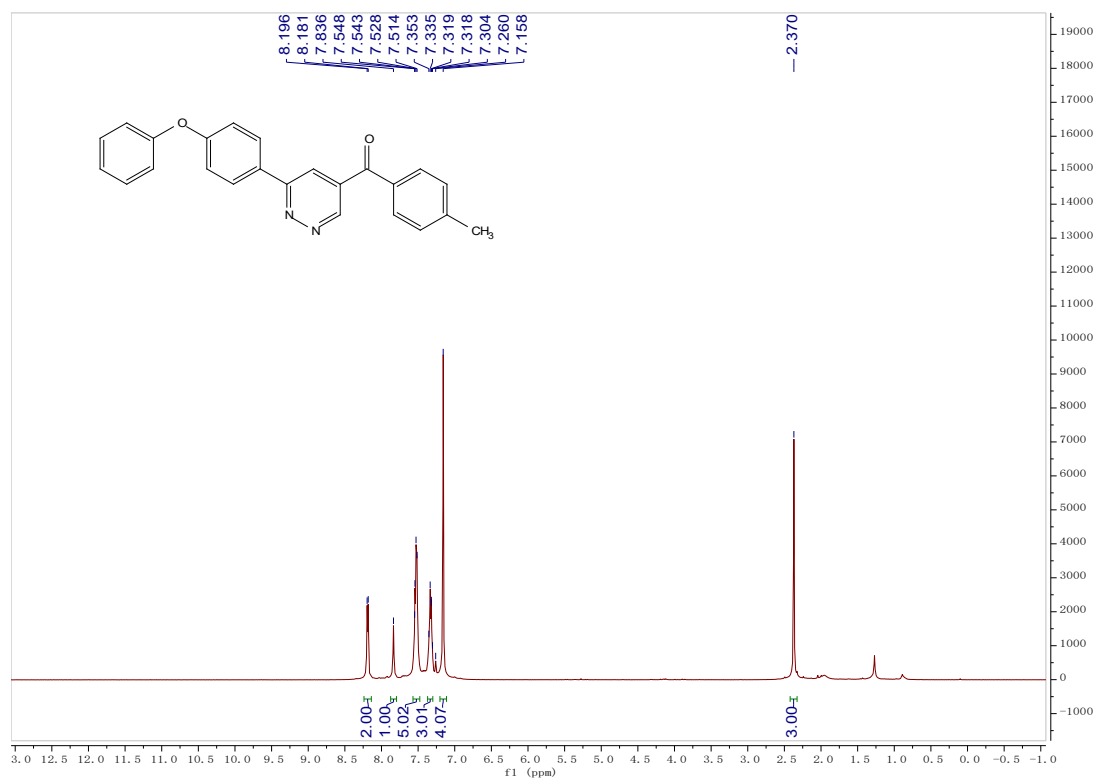

Figure S62. <sup>1</sup>H NMR (500 MHz, CDCl<sub>3</sub>) of compound 6k

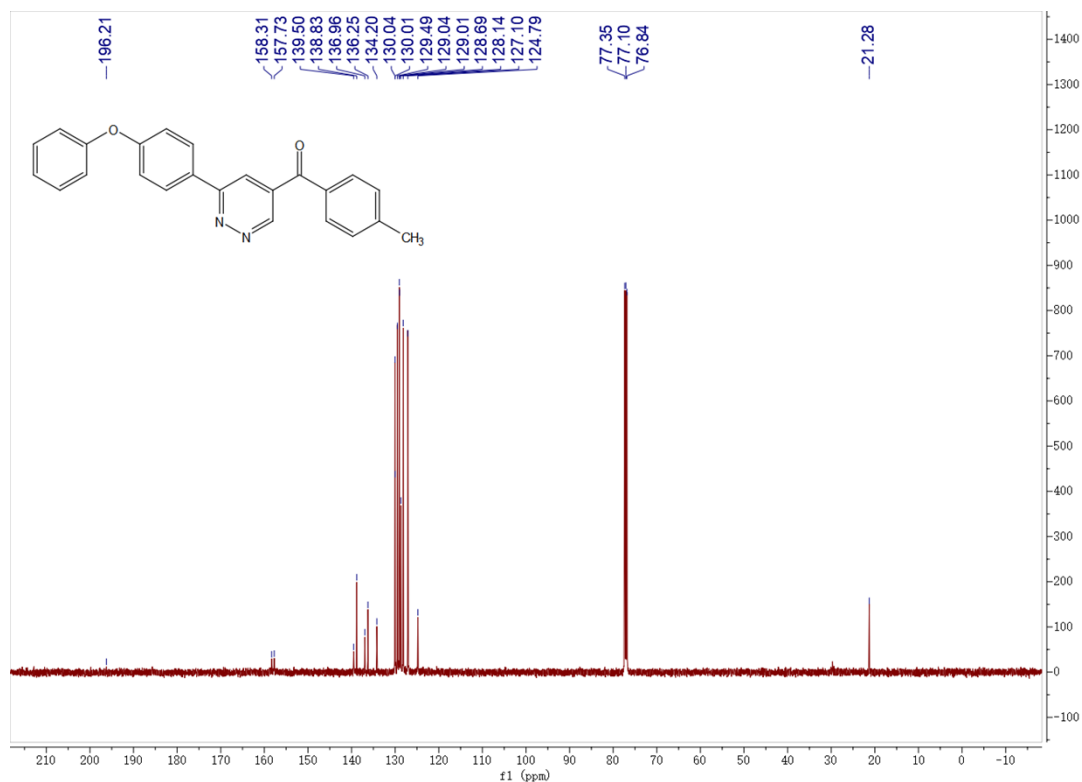

Figure S63. <sup>13</sup>C NMR (125 MHz, CDCl<sub>3</sub>) of compound 6k

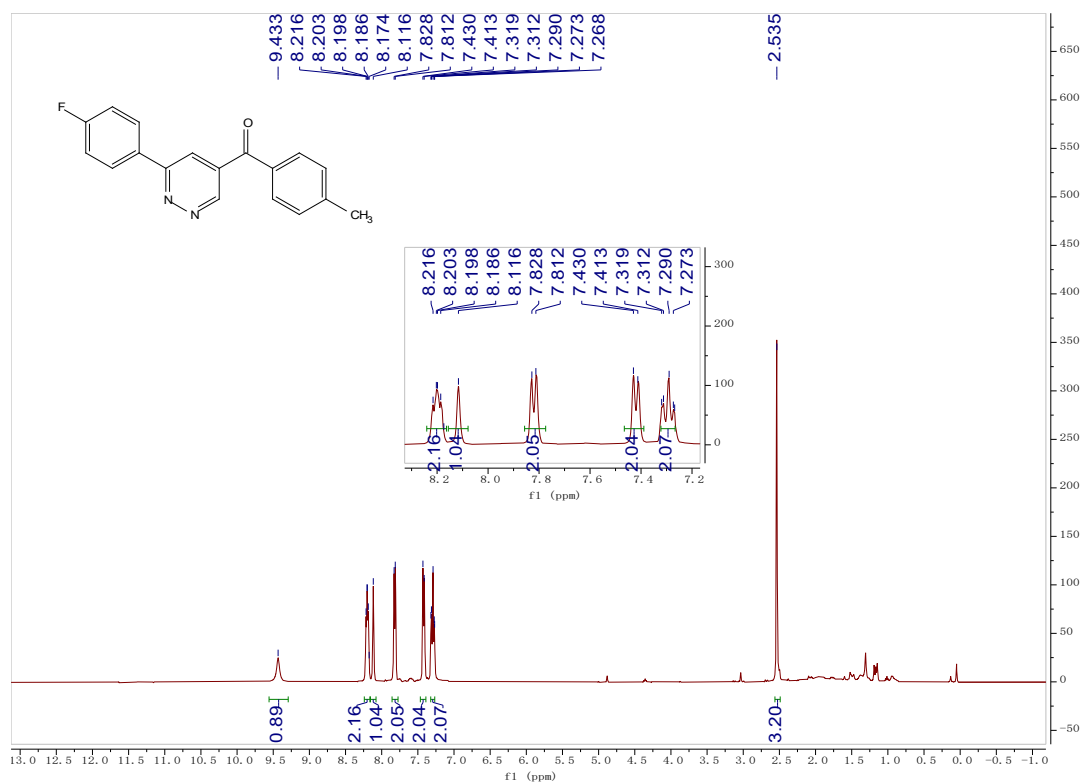

Figure S64. <sup>1</sup>H NMR (400 MHz, CDCl<sub>3</sub>) of compound 6l

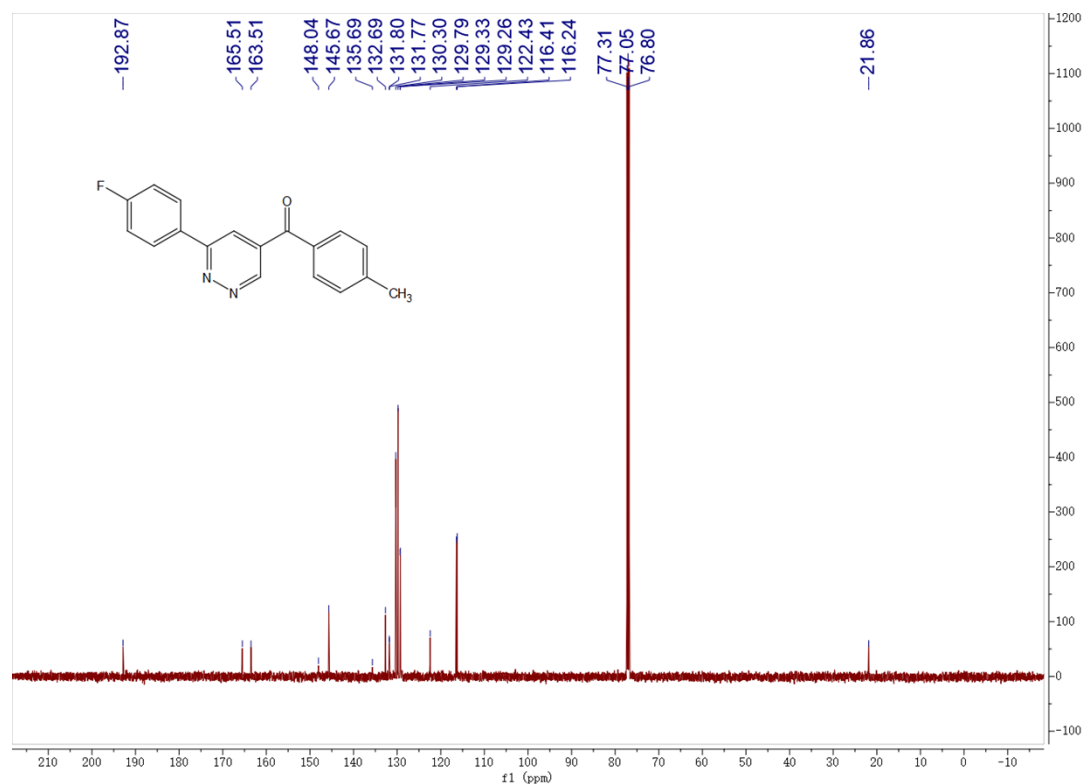

Figure S65.  $^{13}\text{C}$  NMR (125 MHz,  $\text{CDCl}_3$ ) of compound **6l**

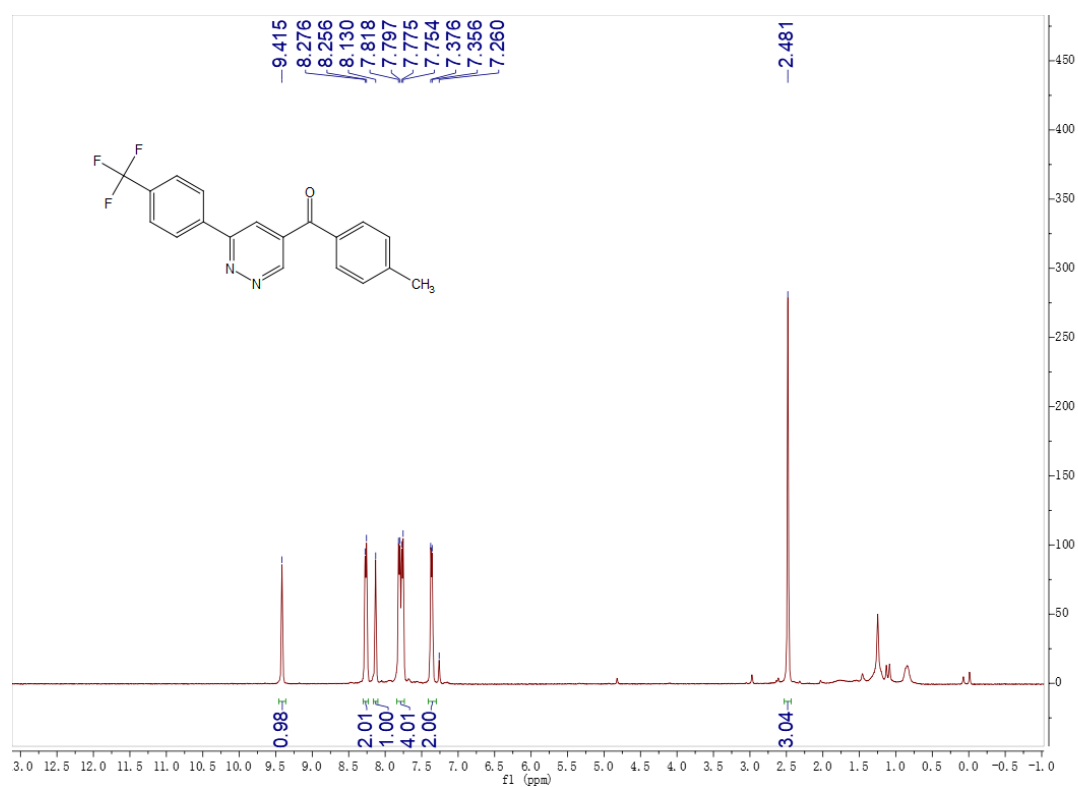

Figure S66.  $^1\text{H}$  NMR (400 MHz,  $\text{CDCl}_3$ ) of compound **6m**

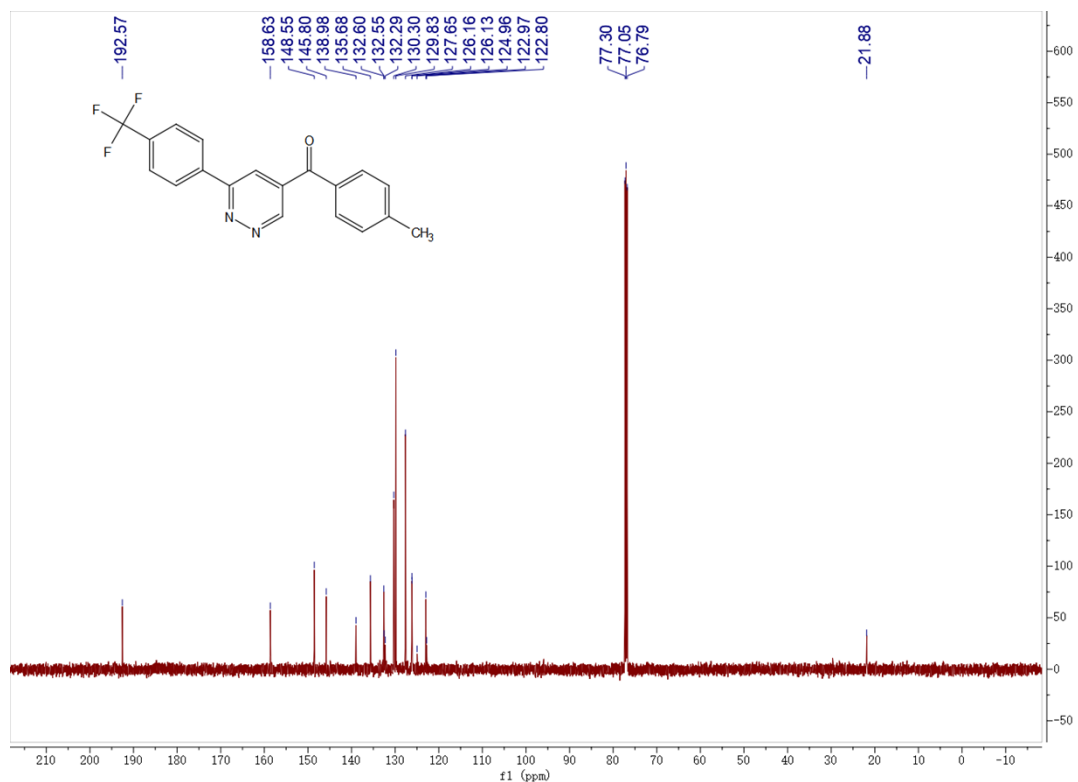

Figure S67. <sup>13</sup>C NMR (125 MHz, CDCl<sub>3</sub>) of compound 6m

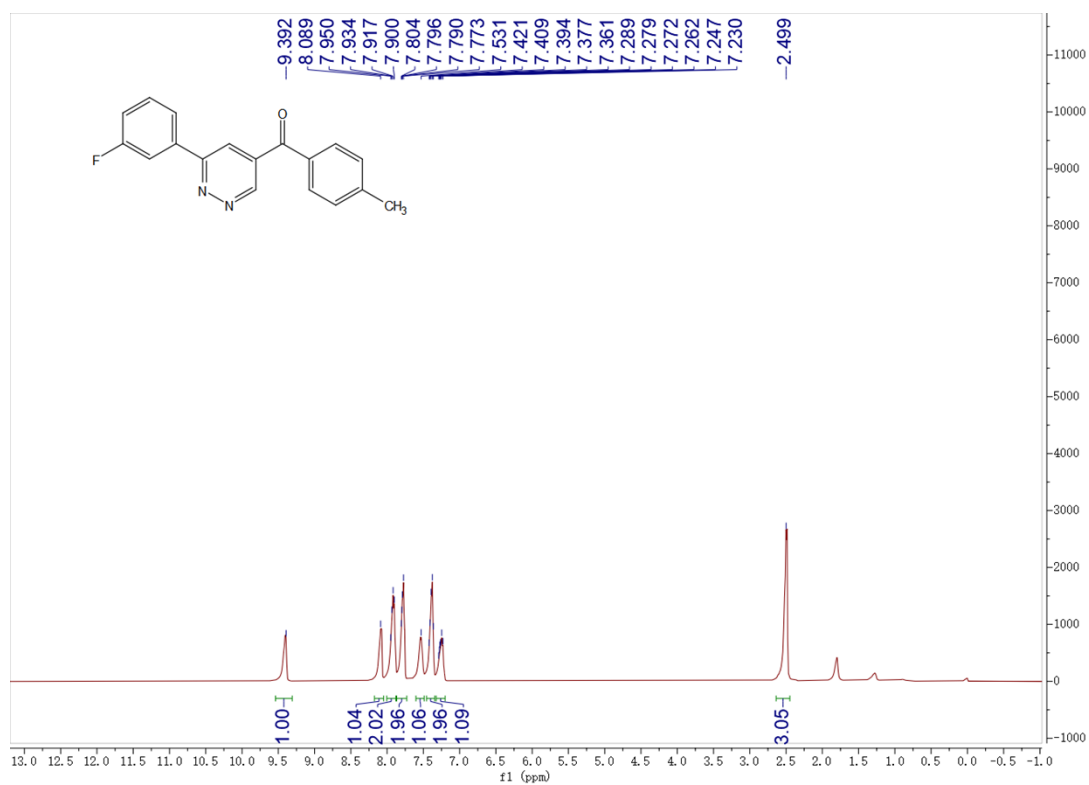

Figure S68. <sup>1</sup>H NMR (500 MHz, CDCl<sub>3</sub>) of compound 6m

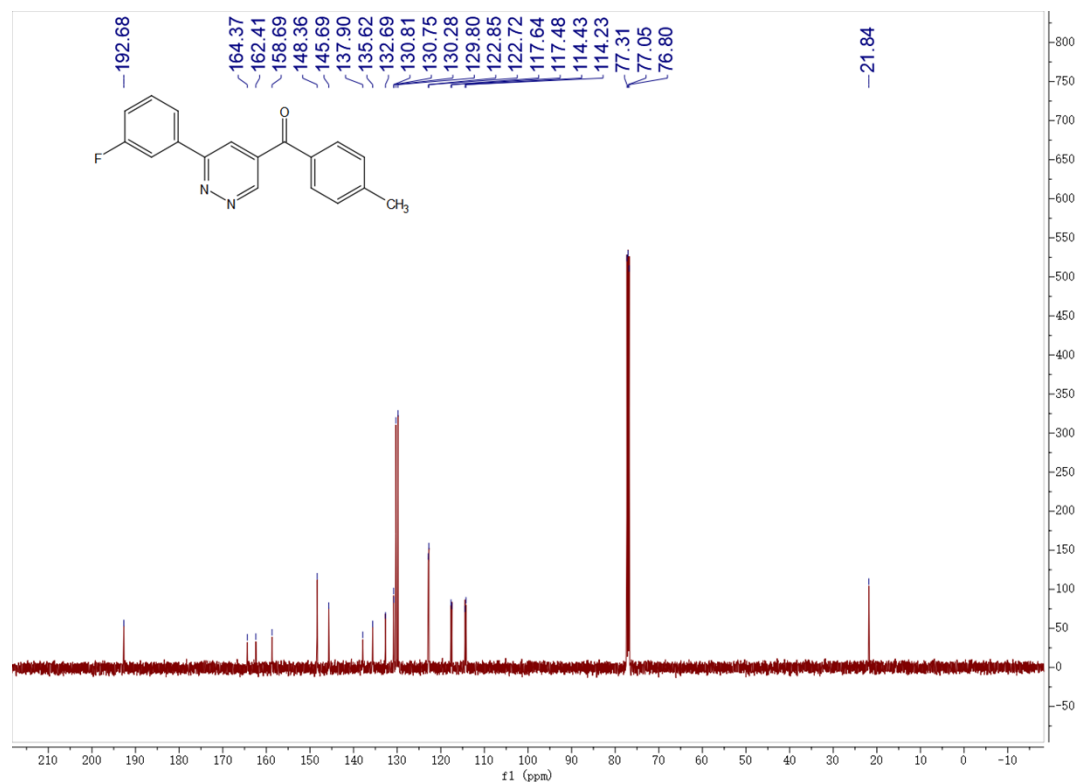

Figure S69.  $^{13}\text{C}$  NMR (125 MHz,  $\text{CDCl}_3$ ) of compound 6n

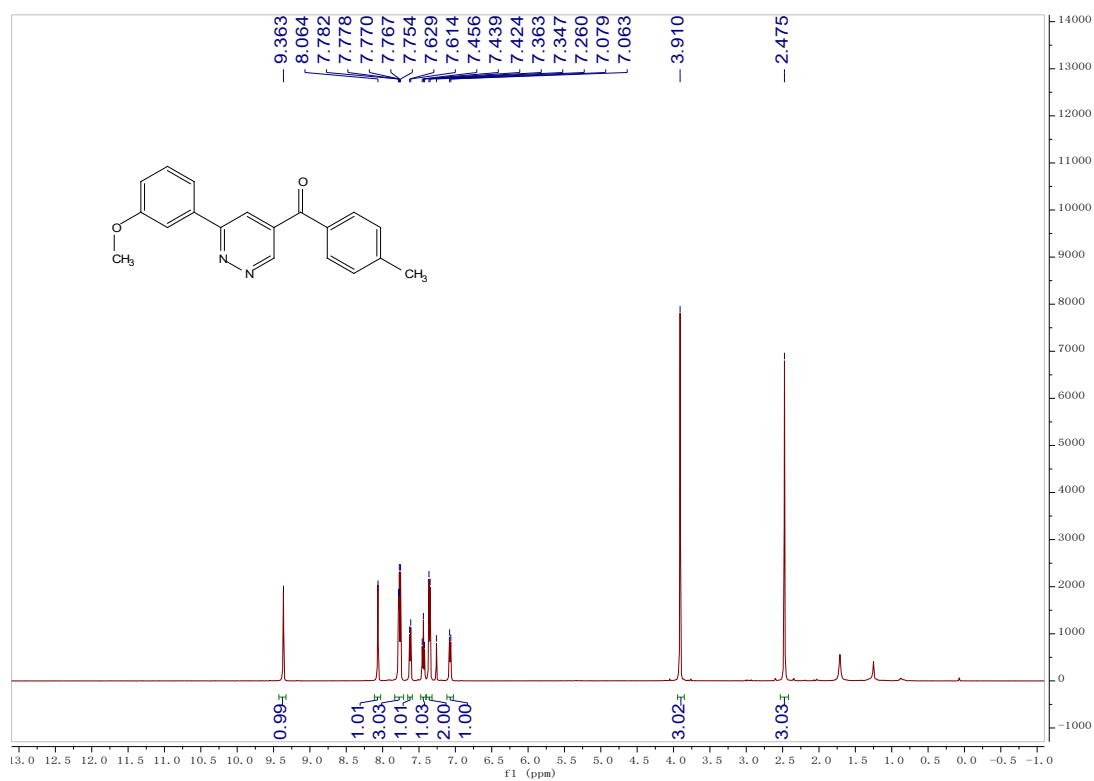

Figure S70.  $^1\text{H}$  NMR (500 MHz,  $\text{CDCl}_3$ ) of compound 6o



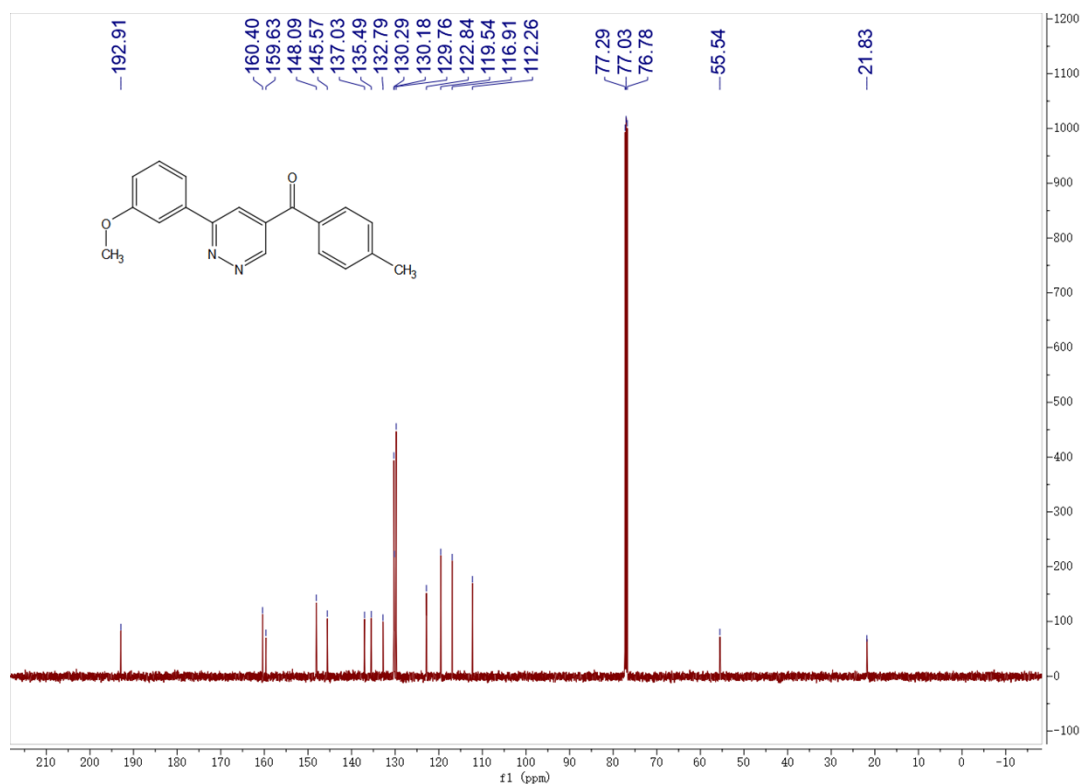

Figure S71. <sup>13</sup>C NMR (125 MHz, CDCl<sub>3</sub>) of compound 6o

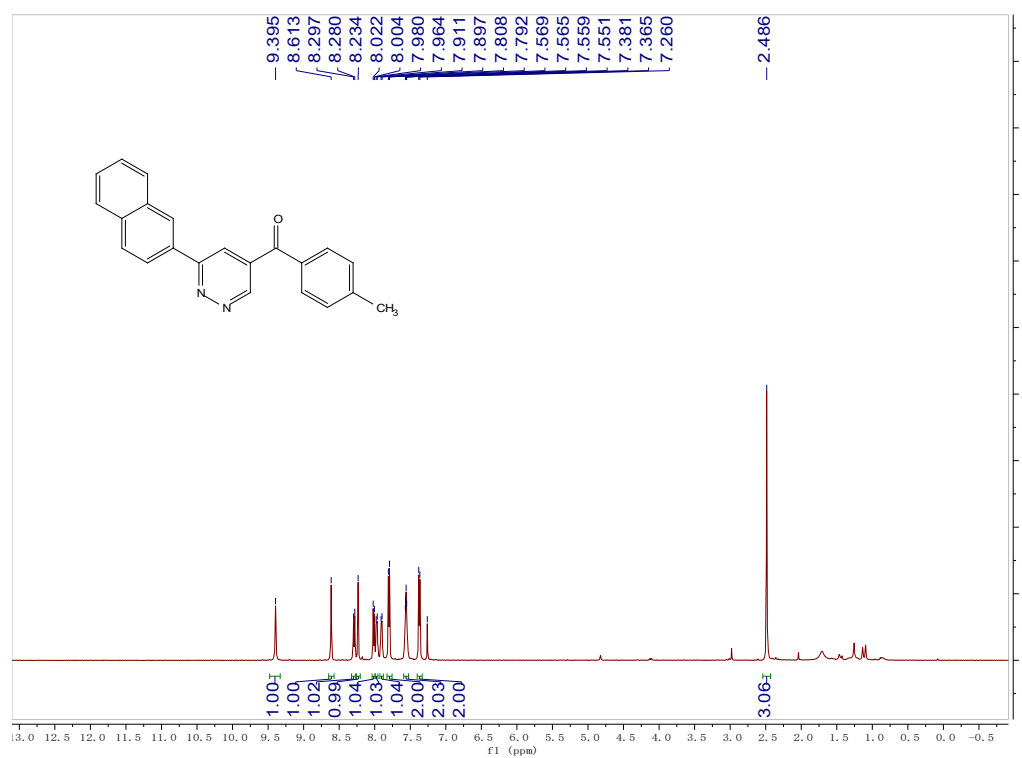

Figure S72. <sup>1</sup>H NMR (500 MHz, CDCl<sub>3</sub>) of compound 6p

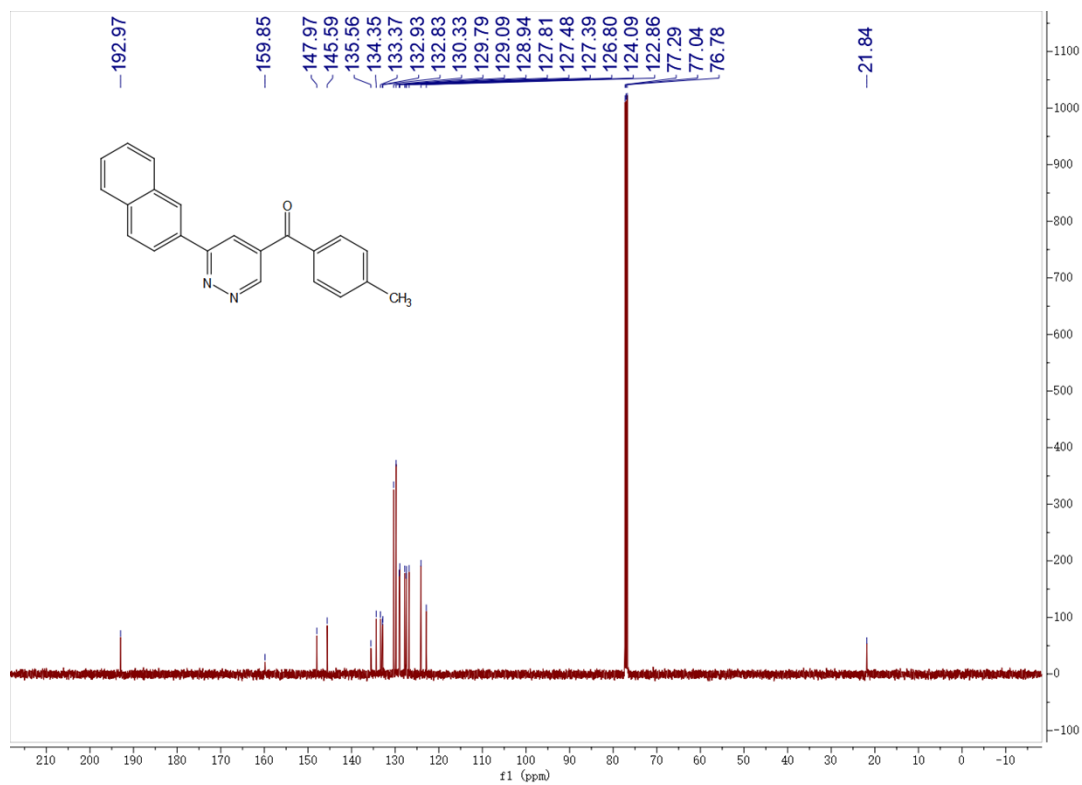

Figure S73. <sup>13</sup>C NMR (125 MHz, CDCl<sub>3</sub>) of compound 6p

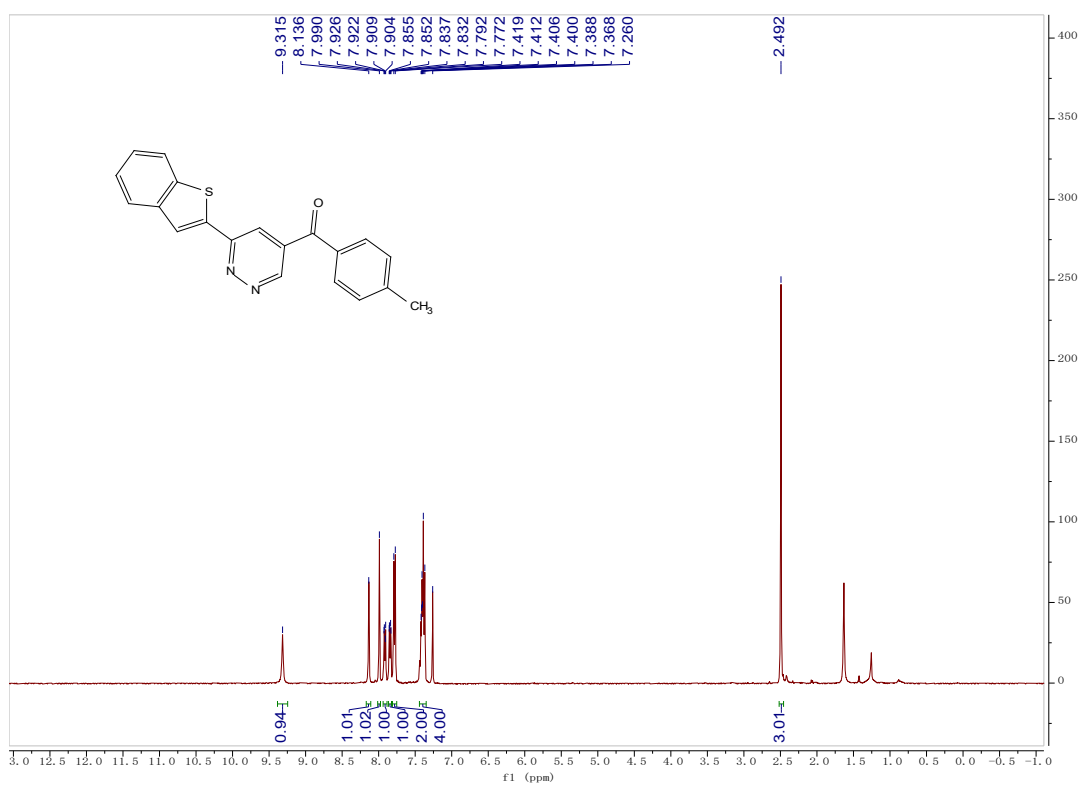

Figure S74. <sup>1</sup>H NMR (400 MHz, CDCl<sub>3</sub>) of compound 6q

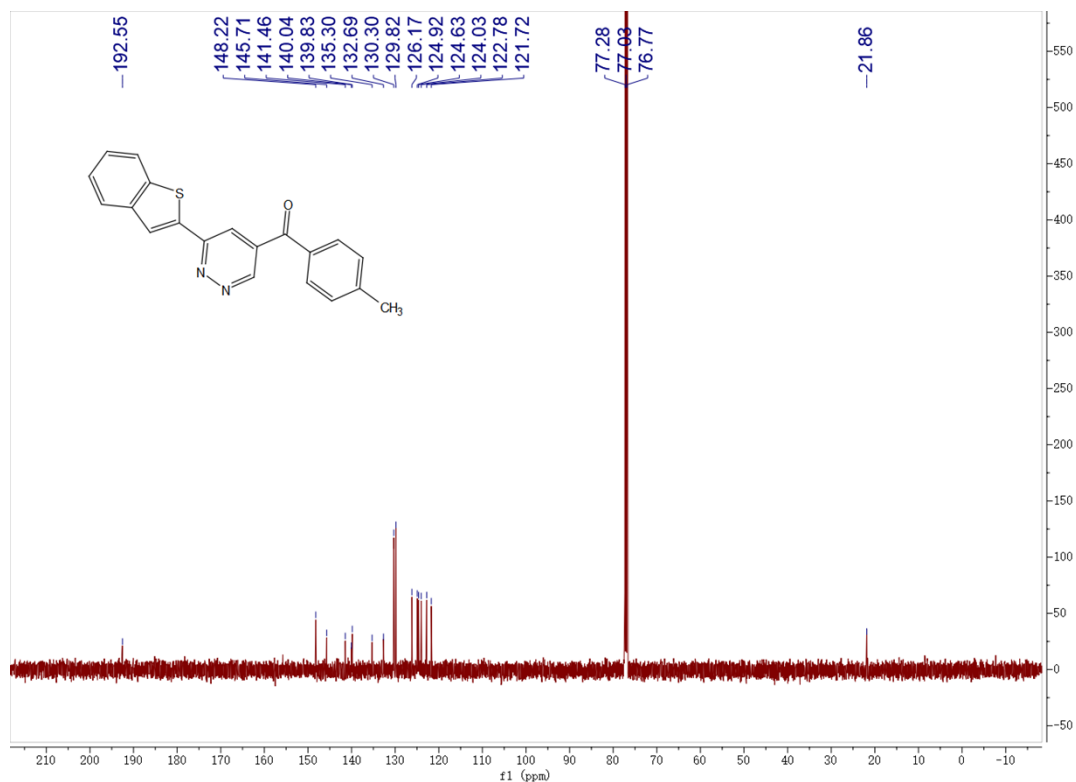

Figure S75. <sup>13</sup>C NMR (125 MHz, CDCl<sub>3</sub>) of compound 6q

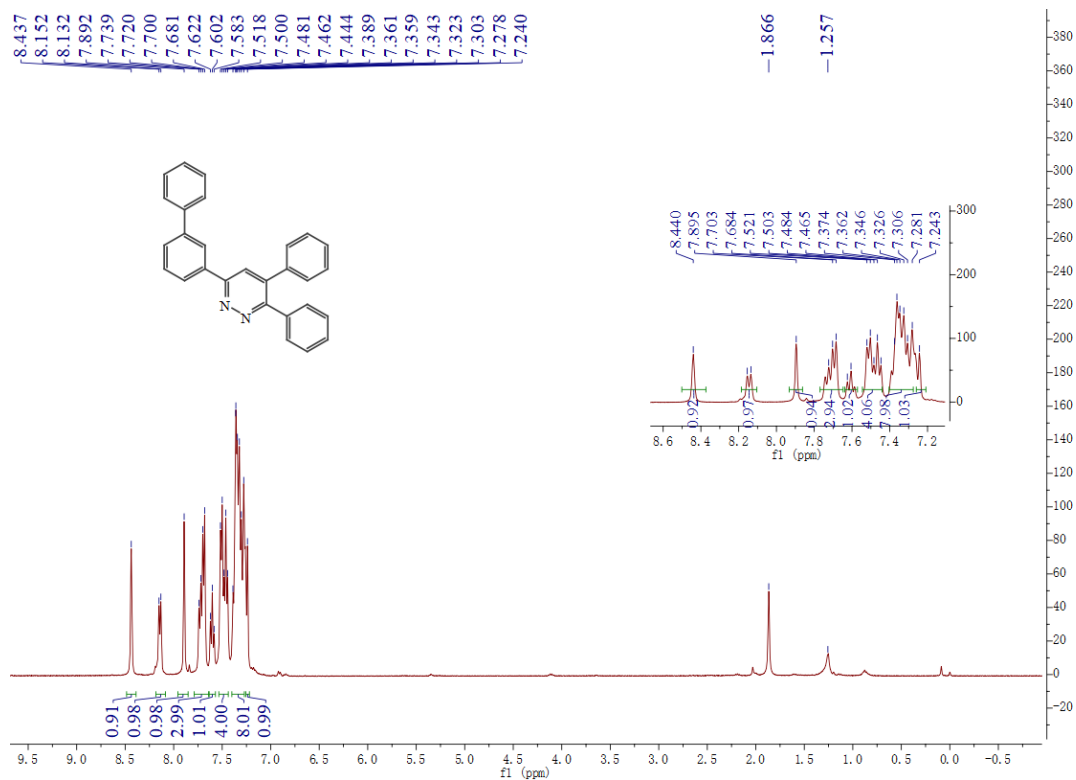

Figure S76. <sup>1</sup>H NMR (400 MHz, CDCl<sub>3</sub>) of compound 3q

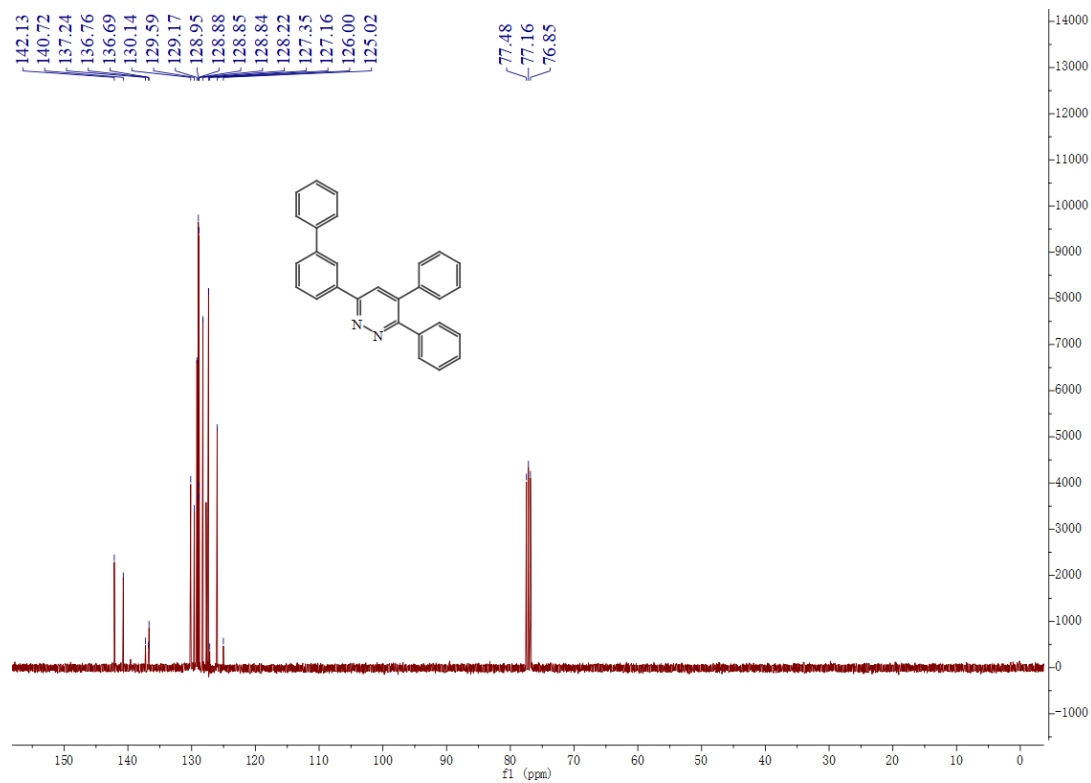

Figure S77.  $^{13}\text{C}$  NMR (100 MHz,  $\text{CDCl}_3$ ) of compound 3q

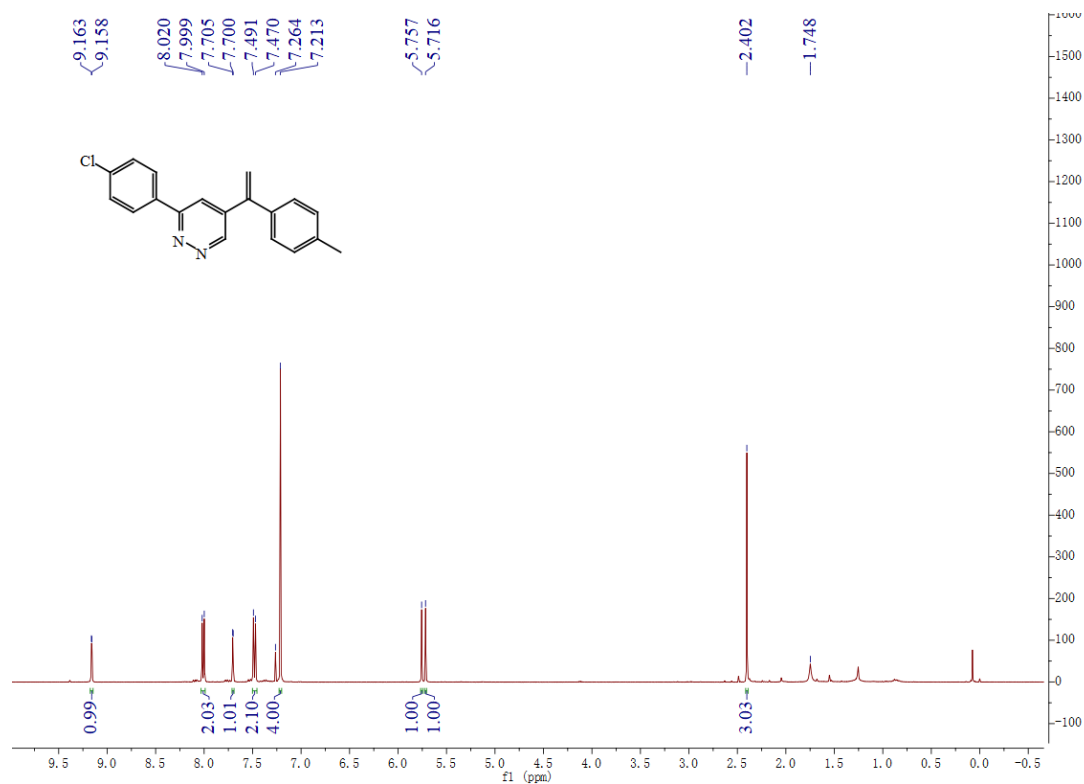

Figure S78.  $^1\text{H}$  NMR (400 MHz,  $\text{CDCl}_3$ ) of compound 6r

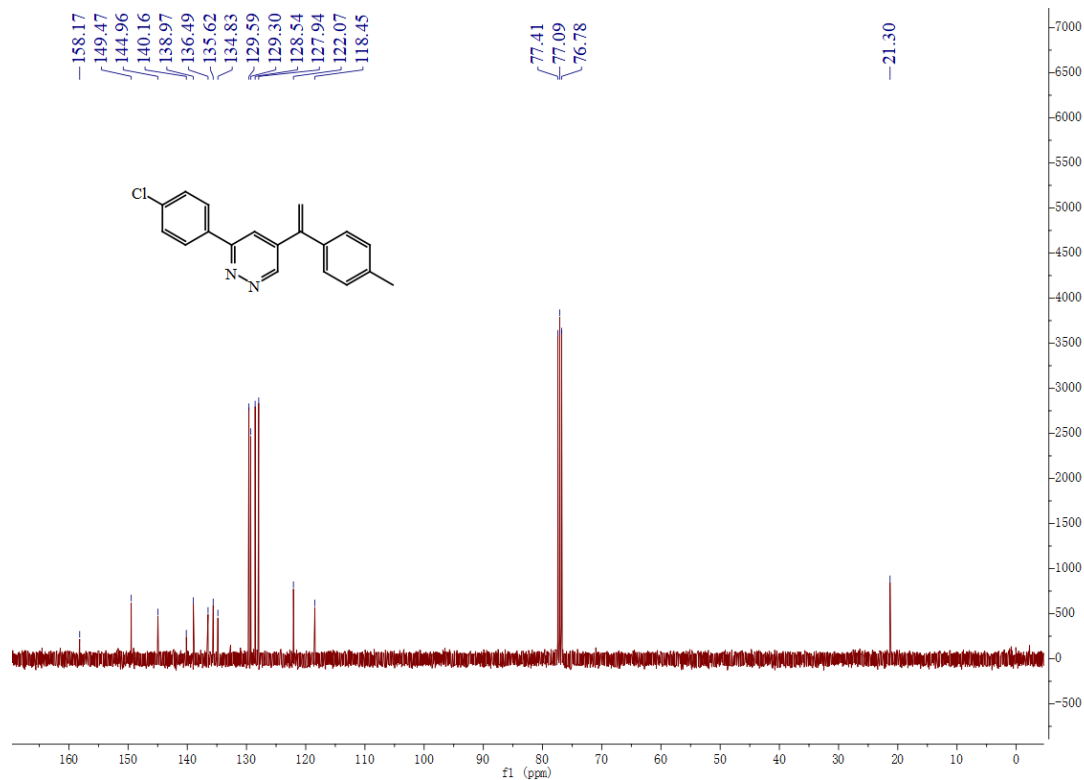

Figure S79. <sup>13</sup>C NMR (100 MHz, CDCl<sub>3</sub>) of compound 6r

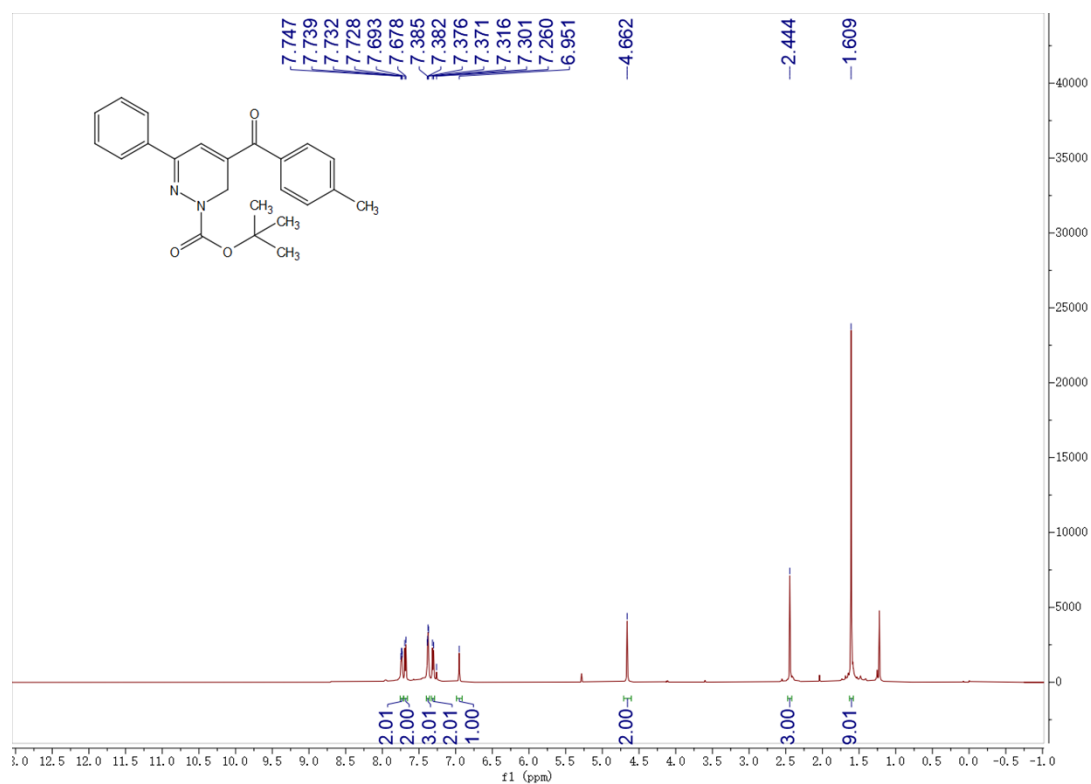

Figure S80. <sup>1</sup>H NMR (500 MHz, CDCl<sub>3</sub>) of compound 6s

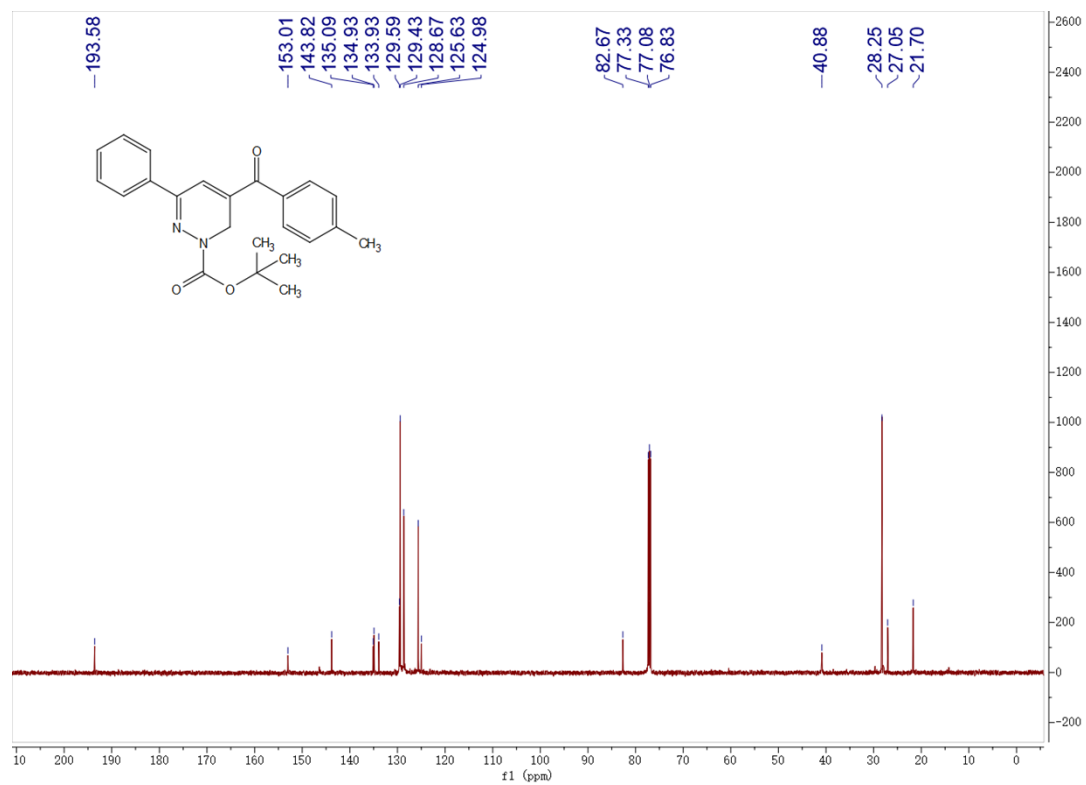

Figure S81. <sup>13</sup>C NMR (125 MHz, CDCl<sub>3</sub>) of compound 6s
